# Supplementary material for: Identification of Genomic Regions Associated with High Grain Zn Content in Polished Rice Using Genotyping-by-Sequencing (GBS)
Source: Plants (Basel). 2022 Dec 28;12(1):144. doi: 10.3390/plants12010144 (PMC9824299; doi:10.3390/plants12010144)
Supplement: Supplementary file 1 [file plants-12-00144-s001.zip › Supplementary Tables.xlsx]

## Sheet: Table S1_Epistatic QTLs 
S.No	TraitName	Chr 1st	Position1	LeftMarker1	RightMarker1	Chr 2nd	Position2	LeftMarker2	RightMarker2	LOD	PVE(%)	Add1	Add2	AddbyAdd
1	PH-Kh17	2	160	Chr2.19398520	Chr2.19955748	2	340	Chr2.12479844	Chr2.31358768	5.4956	8.7414	-0.5929	3.3603	-10.2127
2	NT-Kh17	2	370	Chr2.12479844	Chr2.31358768	5	55	Chr5.18692192	Chr5.17801641	5.037	15.38	1.0002	-0.4211	-1.3151
3	ZnBR-Kh17	2	195	Chr2.24248265	Chr2.10686645	2	340	Chr2.12479844	Chr2.31358768	6.9164	6.3238	-0.5157	0.5404	-4.292
4	ZnBR-Kh17	2	175	Chr2.25682947	Chr2.24248265	3	135	Chr3.32176877	Chr3.962276	6.6796	6.0309	-2.0475	-2.5352	2.2632
5	ZnBR-Kh17	2	195	Chr2.24248265	Chr2.10686645	5	200	Chr5.28525048	Chr5.27859206	7.7374	6.3276	-0.4813	-0.5561	4.2773
6	ZnBR-Kh17	2	175	Chr2.25682947	Chr2.24248265	12	120	Chr12.2323351	Chr12.23029491	5.1397	5.9899	-1.9613	-2.0491	2.729
7	FePR-Kh17	3	105	Chr3.32539030	Chr3.32176877	3	120	Chr3.32176877	Chr3.962276	5.7134	4.8565	-0.6139	0.5268	-1.3181
8	FePR-Kh17	5	110	Chr5.14288078	Chr5.24423261	7	40	Chr7.16541978	Chr7.14229996	6.3052	5.7362	-0.1806	-0.0704	-1.2009
9	FePR-Kh17	6	70	Chr6.24594126	Chr6.23919047	8	120	Chr8.2110221	Chr8.2243672	5.0417	3.1912	0.4985	-0.3992	-0.7154
10	FePR-Kh17	8	120	Chr8.2110221	Chr8.2243672	9	60	Chr9.12933343	Chr9.13171423	5.1442	2.9573	-0.4451	0.5731	-0.6401
11	FePR-Kh17	3	190	Chr3.9226729	Chr3.8217129	10	140	Chr10.18248511	Chr10.19304599	5.5594	3.6503	-0.4918	0.4245	-0.7503
12	FePR-Kh17	8	120	Chr8.2110221	Chr8.2243672	11	35	Chr11.27200167	Chr11.25186904	5.8871	3.4184	-0.5731	0.6113	-0.6853
13	FePR-Kh17	11	25	Chr11.18121069	Chr11.27200167	12	100	Chr12.2323351	Chr12.23029491	6.1733	3.6089	0.6307	-0.5397	-0.8316
14	FePR-Kh17	12	95	Chr12.2323351	Chr12.23029491	12	110	Chr12.2323351	Chr12.23029491	5.0806	4.038	-0.4847	0.5379	-0.9502
15	PH-Rb18	1	110	Chr1.36167427	Chr1.35471257	1	135	Chr1.12900648	Chr1.35973332	5.5515	1.0915	31.0904	20.324	-34.2296
16	PH-Rb18	1	10	Chr1.8340318	Chr1.21635281	2	255	Chr2.21906254	Chr2.24513745	7.2948	1.0917	-28.9871	22.4807	26.2558
17	PH-Rb18	2	280	Chr2.17879536	Chr2.17352695	2	315	Chr2.12479844	Chr2.31358768	7.207	1.0057	24.5876	-27.9277	26.3967
18	PH-Rb18	1	10	Chr1.8340318	Chr1.21635281	3	70	Chr3.17020332	Chr3.16726556	6.822	1.048	-29.1947	22.8344	25.8117
19	PH-Rb18	3	35	Chr3.20618562	Chr3.20618568	3	135	Chr3.32176877	Chr3.962276	6.243	1.1475	24.2785	-29.4193	24.1011
20	PH-Rb18	2	100	Chr2.15431638	Chr2.12499979	3	145	Chr3.32176877	Chr3.962276	8.3157	1.1629	21.769	-29.8849	26.2925
21	PH-Rb18	1	10	Chr1.8340318	Chr1.21635281	4	5	Chr4.24062859	Chr4.24575902	6.5497	1.0272	-29.0881	23.1597	25.6204
22	PH-Rb18	2	170	Chr2.19955797	Chr2.25682947	4	5	Chr4.24062859	Chr4.24575902	6.4139	0.9893	-27.7456	24.1307	27.1441
23	PH-Rb18	3	140	Chr3.32176877	Chr3.962276	4	5	Chr4.24062859	Chr4.24575902	6.5013	1.0471	-29.0892	23.4999	25.8234
24	PH-Rb18	4	5	Chr4.24062859	Chr4.24575902	4	10	Chr4.28186720	Chr4.24786373	6.0829	0.9839	24.9851	-28.0258	26.6905
25	PH-Rb18	5	55	Chr5.18692192	Chr5.17801641	5	85	Chr5.19331022	Chr5.18990012	7.973	0.9917	24.502	-24.7446	27.9098
26	PH-Rb18	4	5	Chr4.24062859	Chr4.24575902	5	110	Chr5.14288078	Chr5.24423261	5.9784	0.9961	23.8768	27.8572	-27.4048
27	PH-Rb18	2	255	Chr2.21906254	Chr2.24513745	5	115	Chr5.14288078	Chr5.24423261	7.109	1.079	23.0012	28.1837	-27.1852
28	PH-Rb18	3	35	Chr3.20618562	Chr3.20618568	5	160	Chr5.28525048	Chr5.27859206	6.5014	0.9677	25.0164	-26.4192	27.0703
29	PH-Rb18	1	110	Chr1.36167427	Chr1.35471257	5	225	Chr5.28525048	Chr5.27859206	7.2197	1.0243	23.5063	-28.7201	26.1705
30	PH-Rb18	4	5	Chr4.24062859	Chr4.24575902	6	70	Chr6.24594126	Chr6.23919047	6.4928	0.9865	24.214	-27.6453	27.4973
31	PH-Rb18	2	200	Chr2.10686645	Chr2.24112924	6	140	Chr6.11454555	Chr6.8179907	7.7493	1.1035	-27.8684	22.9933	28.7897
32	PH-Rb18	3	165	Chr3.882919	Chr3.9226729	6	140	Chr6.11454555	Chr6.8179907	7.3205	1.1072	-26.6573	24.0683	29.5696
33	PH-Rb18	1	175	Chr1.5234872	Chr1.5735150	6	195	Chr6.28684145	Chr6.30895032	7.0188	1.0662	-28.9034	22.6733	28.6852
34	PH-Rb18	5	225	Chr5.28525048	Chr5.27859206	6	195	Chr6.28684145	Chr6.30895032	6.8062	1.072	-29.624	22.3908	27.2222
35	PH-Rb18	6	145	Chr6.8061219	Chr6.6838634	6	195	Chr6.28684145	Chr6.30895032	6.4528	1.0783	26.7679	24.0506	-29.7871
36	PH-Rb18	1	10	Chr1.8340318	Chr1.21635281	7	110	Chr7.22879498	Chr7.1693092	6.4729	1.0287	-28.7455	23.2974	25.5123
37	PH-Rb18	7	5	Chr7.28896388	Chr7.27986253	7	110	Chr7.22879498	Chr7.1693092	6.3404	1.0298	28.3916	24.0253	-25.813
38	PH-Rb18	2	30	Chr2.27328938	Chr2.31005001	7	130	Chr7.5034762	Chr7.19372110	7.2203	0.9625	25.9454	25.7635	-26.7986
39	PH-Rb18	4	55	Chr4.34361396	Chr4.34862789	7	130	Chr7.5034762	Chr7.19372110	7.1282	0.9745	25.5367	25.7852	-27.1305
40	PH-Rb18	6	195	Chr6.28684145	Chr6.30895032	7	130	Chr7.5034762	Chr7.19372110	8.0295	1.1087	23.4734	27.3767	-30.1751
41	PH-Rb18	3	145	Chr3.32176877	Chr3.962276	7	135	Chr7.5034762	Chr7.19372110	6.6568	1.0685	-28.6509	22.8984	26.4809
42	PH-Rb18	5	110	Chr5.14288078	Chr5.24423261	7	135	Chr7.5034762	Chr7.19372110	6.9891	1.0489	27.4374	23.6493	-27.6652
43	PH-Rb18	1	110	Chr1.36167427	Chr1.35471257	8	15	Chr8.24408601	Chr8.27101175	7.1731	0.9938	24.7688	26.5729	-27.9482
44	PH-Rb18	6	195	Chr6.28684145	Chr6.30895032	8	20	Chr8.24408601	Chr8.27101175	7.0423	1.072	23.6548	27.0168	-29.5101
45	PH-Rb18	5	225	Chr5.28525048	Chr5.27859206	8	95	Chr8.18770353	Chr8.18714927	7.8922	1.0332	-28.9188	23.254	26.4239
46	PH-Rb18	8	25	Chr8.24408601	Chr8.27101175	8	95	Chr8.18770353	Chr8.18714927	7.0343	1.1038	25.7817	24.224	-29.5777
47	PH-Rb18	2	205	Chr2.10686645	Chr2.24112924	8	140	Chr8.14292717	Chr8.14584977	7.1965	0.9858	-27.4261	24.2464	27.7419
48	PH-Rb18	3	25	Chr3.23984383	Chr3.24916270	8	140	Chr8.14292717	Chr8.14584977	7.7599	0.9821	-26.7557	24.0099	28.0656
49	PH-Rb18	4	100	Chr4.34871830	Chr4.26457631	8	140	Chr8.14292717	Chr8.14584977	5.9062	0.9842	-27.6077	24.174	27.6133
50	PH-Rb18	7	115	Chr7.1075484	Chr7.1050895	8	140	Chr8.14292717	Chr8.14584977	7.5275	0.9906	-26.7768	23.4597	28.5694
51	PH-Rb18	8	100	Chr8.19121755	Chr8.19031845	9	0	Chr9.16714820	Chr9.16563040	7.4781	0.979	24.7562	-26.4731	27.6972
52	PH-Rb18	3	70	Chr3.17020332	Chr3.16726556	9	85	Chr9.7158300	Chr9.9790554	8.5093	1.0183	24.0301	27.2414	-27.9854
53	PH-Rb18	6	195	Chr6.28684145	Chr6.30895032	9	85	Chr9.7158300	Chr9.9790554	8.1204	1.0628	22.9481	28.3594	-28.7458
54	PH-Rb18	2	280	Chr2.17879536	Chr2.17352695	9	170	Chr9.10829497	Chr9.10047818	6.4695	1.0757	26.836	24.1097	-29.8641
55	PH-Rb18	7	130	Chr7.5034762	Chr7.19372110	9	170	Chr9.10829497	Chr9.10047818	6.4329	1.0464	26.4792	24.5745	-29.2712
56	PH-Rb18	9	85	Chr9.7158300	Chr9.9790554	9	170	Chr9.10829497	Chr9.10047818	7.4745	0.9893	27.2284	24.3663	-27.6135
57	PH-Rb18	1	35	Chr1.28202918	Chr1.27424849	9	175	Chr9.10829497	Chr9.10047818	6.8056	0.9733	-27.2986	24.7137	26.4432
58	PH-Rb18	5	225	Chr5.28525048	Chr5.27859206	9	185	Chr9.3990952	Chr9.4052267	7.0352	1.0286	-28.1982	23.6526	26.0285
59	PH-Rb18	4	5	Chr4.24062859	Chr4.24575902	9	245	Chr9.7256130	Chr9.10643350	5.3993	1.0145	25.1643	-28.4846	25.8974
60	PH-Rb18	5	225	Chr5.28525048	Chr5.27859206	10	60	Chr10.18761282	Chr10.18418785	5.3622	0.9913	-27.7034	24.7655	25.0602
61	PH-Rb18	3	145	Chr3.32176877	Chr3.962276	10	65	Chr10.18122916	Chr10.17994542	5.1931	1.0341	-28.3063	24.5652	23.8773
62	PH-Rb18	4	5	Chr4.24062859	Chr4.24575902	10	65	Chr10.18122916	Chr10.17994542	5.1874	0.7083	12.9645	16.6683	-17.9501
63	PH-Rb18	8	10	Chr8.12706274	Chr8.24408601	10	65	Chr10.18122916	Chr10.17994542	8.0989	0.987	24.8431	26.5132	-27.2898
64	PH-Rb18	9	170	Chr9.10829497	Chr9.10047818	10	120	Chr10.2920342	Chr10.22330309	6.2094	0.9873	24.214	-27.5564	27.4465
65	PH-Rb18	1	110	Chr1.36167427	Chr1.35471257	10	140	Chr10.18248511	Chr10.19304599	6.8224	1.0023	23.8292	-28.2187	26.4196
66	PH-Rb18	2	255	Chr2.21906254	Chr2.24513745	10	140	Chr10.18248511	Chr10.19304599	6.9547	1.0792	23.0799	-27.977	27.4503
67	PH-Rb18	7	155	Chr7.6227285	Chr7.6224199	10	140	Chr10.18248511	Chr10.19304599	6.6554	0.9881	24.8977	-27.6003	25.035
68	PH-Rb18	10	140	Chr10.18248511	Chr10.19304599	10	145	Chr10.18248511	Chr10.19304599	7.4363	1.1776	-20.9322	21.9838	31.6703
69	PH-Rb18	6	140	Chr6.11454555	Chr6.8179907	10	150	Chr10.19304599	Chr10.19575461	6.2558	1.126	23.6716	-26.6628	29.5803
70	PH-Rb18	2	255	Chr2.21906254	Chr2.24513745	11	20	Chr11.18121069	Chr11.27200167	7.0932	1.0768	22.9693	-28.283	27.0211
71	PH-Rb18	1	110	Chr1.36167427	Chr1.35471257	11	25	Chr11.18121069	Chr11.27200167	7.3404	1.0728	23.6843	-29.1696	25.2529
72	PH-Rb18	6	140	Chr6.11454555	Chr6.8179907	11	25	Chr11.18121069	Chr11.27200167	7.3738	1.1358	22.3114	-29.7167	26.6363
73	PH-Rb18	7	70	Chr7.27506380	Chr7.27585649	11	25	Chr11.18121069	Chr11.27200167	6.6914	1.0604	23.8068	-29.0267	25.1898
74	PH-Rb18	10	65	Chr10.18122916	Chr10.17994542	11	25	Chr11.18121069	Chr11.27200167	5.9191	1.0472	25.1462	-28.1244	24.0286
75	PH-Rb18	11	30	Chr11.18121069	Chr11.27200167	11	35	Chr11.27200167	Chr11.25186904	6.1468	1.0739	-26.9006	22.9596	26.698
76	PH-Rb18	4	5	Chr4.24062859	Chr4.24575902	11	40	Chr11.25186904	Chr11.23220554	7.4181	1.0608	24.4358	-28.9306	25.559
77	PH-Rb18	8	140	Chr8.14292717	Chr8.14584977	11	45	Chr11.25186904	Chr11.23220554	6.1855	1.0594	24.3933	-29.0702	25.7833
78	PH-Rb18	3	150	Chr3.32176877	Chr3.962276	11	80	Chr11.23220531	Chr11.3310516	6.4813	1.0011	-28.3073	23.873	24.5512
79	PH-Rb18	5	225	Chr5.28525048	Chr5.27859206	11	110	Chr11.8726410	Chr11.18803530	6.625	1.0021	-28.0264	24.325	25.3891
80	PH-Rb18	9	85	Chr9.7158300	Chr9.9790554	11	140	Chr11.474844	Chr11.2371366	6.4684	0.9714	25.5747	26.9373	-24.9822
81	PH-Rb18	8	15	Chr8.24408601	Chr8.27101175	12	15	Chr12.8861968	Chr12.10229338	7.5026	1.0168	26.7169	24.4063	-28.2359
82	PH-Rb18	1	160	Chr1.5234872	Chr1.5735150	12	20	Chr12.3662902	Chr12.27270676	7.8046	0.9815	-27.9993	24.9762	26.5901
83	PH-Rb18	2	75	Chr2.32029856	Chr2.31420968	12	20	Chr12.3662902	Chr12.27270676	8.3332	0.983	-26.7121	24.0684	28.0885
84	PH-Rb18	4	30	Chr4.24786373	Chr4.33251627	12	20	Chr12.3662902	Chr12.27270676	6.4892	1.0266	-28.8753	24.9969	26.0012
85	PH-Rb18	9	130	Chr9.18684863	Chr9.18915073	12	20	Chr12.3662902	Chr12.27270676	8.4417	0.9775	-27.0091	24.3998	27.7738
86	PH-Rb18	3	140	Chr3.32176877	Chr3.962276	12	45	Chr12.24019067	Chr12.21760894	7.8383	1.1933	-31.1427	21.4801	26.6813
87	PH-Rb18	5	115	Chr5.14288078	Chr5.24423261	12	45	Chr12.24019067	Chr12.21760894	7.3367	1.0664	29.3246	22.4558	-27.678
88	PH-Rb18	6	245	Chr6.6569100	Chr6.12310577	12	45	Chr12.24019067	Chr12.21760894	8.4332	1.0954	28.3223	22.4897	-29.674
89	PH-Rb18	7	5	Chr7.28896388	Chr7.27986253	12	45	Chr12.24019067	Chr12.21760894	7.7906	1.0828	29.65	22.615	-27.2326
90	PH-Rb18	10	120	Chr10.2920342	Chr10.22330309	12	45	Chr12.24019067	Chr12.21760894	7.9652	1.0444	-28.3493	23.0798	28.5431
91	PH-Rb18	11	25	Chr11.18121069	Chr11.27200167	12	45	Chr12.24019067	Chr12.21760894	7.8191	1.1374	-30.4313	22.0615	26.7279
92	PH-Rb18	12	20	Chr12.3662902	Chr12.27270676	12	130	Chr12.2323351	Chr12.23029491	7.5631	1.0634	25.0782	-25.5622	29.2216
93	NT-Rb18	1	110	Chr1.36167427	Chr1.35471257	2	305	Chr2.10731414	Chr2.15278384	5.3098	12.9935	-1.152	2.3265	-3.9731
94	NT-Rb18	1	110	Chr1.36167427	Chr1.35471257	8	150	Chr8.10695241	Chr8.5155671	5.4721	11.197	-0.8751	-2.6055	3.5783
95	FeBR-Rb18	2	310	Chr2.13409020	Chr2.12479844	3	160	Chr3.5536585	Chr3.882919	5.1736	8.1235	-2.0002	-1.8933	-2.4103
96	FeBR-Rb18	1	105	Chr1.34037082	Chr1.35010288	10	150	Chr10.19304599	Chr10.19575461	5.5499	8.1845	2.1417	-1.8344	2.3775
97	FeBR-Rb18	1	10	Chr1.8340318	Chr1.21635281	12	10	Chr12.17575057	Chr12.8861968	5.0757	7.3297	-1.9735	2.0292	2.3167
98	FePR-Rb18	2	135	Chr2.17352707	Chr2.19465834	12	0	Chr12.14104199	Chr12.17575057	5.3956	26.8313	-0.2551	-0.3272	0.3696
99	PH-Kh20	2	165	Chr2.19955797	Chr2.25682947	2	320	Chr2.12479844	Chr2.31358768	5.4794	24.4898	-1.5167	-2.7571	-9.4623
100	ZnBR-kh20	2	335	Chr2.12479844	Chr2.31358768	4	20	Chr4.24786373	Chr4.33251627	6.0983	4.3676	2.7605	-1.4161	-3.6238
101	ZnBR-kh20	3	125	Chr3.32176877	Chr3.962276	4	30	Chr4.24786373	Chr4.33251627	5.6913	4.1941	2.8409	-1.3485	-3.1326
102	ZnBR-kh20	4	30	Chr4.24786373	Chr4.33251627	5	215	Chr5.28525048	Chr5.27859206	6.2428	4.2619	-1.4987	2.8231	-3.2626
103	ZnBR-kh20	2	215	Chr2.10686645	Chr2.24112924	6	140	Chr6.11454555	Chr6.8179907	5.7383	2.6275	2.4903	-2.4155	-3.1642
104	ZnBR-kh20	5	115	Chr5.14288078	Chr5.24423261	6	140	Chr6.11454555	Chr6.8179907	5.5168	2.4518	-2.7005	-2.4814	2.9592
105	ZnBR-kh20	4	25	Chr4.24786373	Chr4.33251627	8	30	Chr8.24408601	Chr8.27101175	5.4192	4.172	-1.3751	2.7469	-3.1624
106	ZnBR-kh20	4	20	Chr4.24786373	Chr4.33251627	9	255	Chr9.7256130	Chr9.10643350	6.5628	4.5295	-1.0751	2.7061	-3.4653
107	ZnBR-kh20	4	30	Chr4.24786373	Chr4.33251627	11	25	Chr11.18121069	Chr11.27200167	7.0327	4.2958	-1.6133	2.8993	-3.5145
108	ZnBR-kh20	11	25	Chr11.18121069	Chr11.27200167	11	40	Chr11.25186904	Chr11.23220554	5.4755	3.2423	2.2416	-2.0855	-3.7442
109	ZnBR-kh20	4	20	Chr4.24786373	Chr4.33251627	12	85	Chr12.440277	Chr12.1665215	5.4753	4.173	-1.7329	-2.7664	3.6135
110	ZnPR-kh20	1	35	Chr1.28202918	Chr1.27424849	1	100	Chr1.30498731	Chr1.35060392	6.0923	1.4209	5.3173	-5.3925	-6.1642
111	ZnPR-kh20	1	35	Chr1.28202918	Chr1.27424849	2	260	Chr2.21906254	Chr2.24513745	5.8276	1.3537	5.2472	-5.5661	-5.9822
112	ZnPR-kh20	2	0	Chr2.30620280	Chr2.27571374	2	275	Chr2.29803880	Chr2.28281308	6.1327	1.3178	5.1342	-5.8853	-5.3647
113	ZnPR-kh20	1	40	Chr1.28202918	Chr1.27424849	3	35	Chr3.20618562	Chr3.20618568	6.015	1.2772	5.5726	-5.4156	-5.6934
114	ZnPR-kh20	2	180	Chr2.25682947	Chr2.24248265	3	70	Chr3.17020332	Chr3.16726556	5.188	1.7391	-2.9565	-3.1459	3.2286
115	ZnPR-kh20	3	65	Chr3.22060292	Chr3.22880259	3	70	Chr3.17020332	Chr3.16726556	5.7134	1.713	3.1075	-3.9949	-4.686
116	ZnPR-kh20	3	70	Chr3.17020332	Chr3.16726556	4	40	Chr4.24786373	Chr4.33251627	5.3335	1.8454	-2.8689	-3.3047	2.9826
117	ZnPR-kh20	1	130	Chr1.22861559	Chr1.22802909	4	110	Chr4.26457631	Chr4.26688333	5.5844	1.3671	-5.7032	5.6715	-5.0374
118	ZnPR-kh20	2	25	Chr2.27571374	Chr2.27644169	4	110	Chr4.26457631	Chr4.26688333	6.2914	1.3286	-5.4684	5.8581	-5.2712
119	ZnPR-kh20	2	0	Chr2.30620280	Chr2.27571374	5	105	Chr5.29346607	Chr5.14288078	7.1012	1.5343	6.27	-4.4474	-6.8026
120	ZnPR-kh20	3	110	Chr3.32176877	Chr3.962276	5	105	Chr5.29346607	Chr5.14288078	6.3615	1.4875	6.5161	-4.2457	-6.8039
121	ZnPR-kh20	1	80	Chr1.14730480	Chr1.33158917	5	110	Chr5.14288078	Chr5.24423261	5.5972	1.293	-5.8302	-5.2566	5.5593
122	ZnPR-kh20	4	70	Chr4.34871830	Chr4.26457631	5	110	Chr5.14288078	Chr5.24423261	7.4639	1.3822	5.3449	-5.2268	-6.0509
123	ZnPR-kh20	5	105	Chr5.29346607	Chr5.14288078	5	120	Chr5.24649725	Chr5.24499435	6.3359	1.6201	-3.9559	6.2557	-7.1918
124	ZnPR-kh20	1	130	Chr1.22861559	Chr1.22802909	6	0	Chr6.2002210	Chr6.476095	6.1827	1.3045	-5.7658	5.2042	-5.5069
125	ZnPR-kh20	5	105	Chr5.29346607	Chr5.14288078	6	0	Chr6.2002210	Chr6.476095	7.0864	1.5925	-4.3143	6.349	-6.9221
126	ZnPR-kh20	4	70	Chr4.34871830	Chr4.26457631	6	185	Chr6.30978166	Chr6.30940128	7.0602	1.3661	5.3266	-5.2935	-5.9922
127	ZnPR-kh20	2	30	Chr2.27328938	Chr2.31005001	6	200	Chr6.29953577	Chr6.30034467	5.4883	1.1237	-3.7558	-3.2681	4.1668
128	ZnPR-kh20	3	35	Chr3.20618562	Chr3.20618568	6	230	Chr6.4885394	Chr6.6569100	5.3689	1.2727	-5.4177	5.6267	-5.6056
129	ZnPR-kh20	4	60	Chr4.34589297	Chr4.35385021	7	35	Chr7.17377837	Chr7.16541978	6.99	1.7136	5.6724	-4.4783	-6.812
130	ZnPR-kh20	5	120	Chr5.24649725	Chr5.24499435	7	35	Chr7.17377837	Chr7.16541978	7.0567	1.7685	5.5708	-4.1157	-6.9943
131	ZnPR-kh20	1	160	Chr1.5234872	Chr1.5735150	7	40	Chr7.16541978	Chr7.14229996	5.649	1.305	-5.866	-5.2147	5.5122
132	ZnPR-kh20	2	0	Chr2.30620280	Chr2.27571374	7	40	Chr7.16541978	Chr7.14229996	7.0851	1.3751	5.5819	-5.1461	-6.1037
133	ZnPR-kh20	6	160	Chr6.27964147	Chr6.26419619	7	40	Chr7.16541978	Chr7.14229996	6.3596	1.3714	-5.3525	-5.4857	6.105
134	ZnPR-kh20	3	65	Chr3.22060292	Chr3.22880259	7	50	Chr7.17417964	Chr7.18516920	5.4325	1.7548	3.589	-3.6391	-5.0533
135	ZnPR-kh20	3	145	Chr3.32176877	Chr3.962276	8	20	Chr8.24408601	Chr8.27101175	5.0783	1.8296	3.1003	-3.3974	-3.1904
136	ZnPR-kh20	1	35	Chr1.28202918	Chr1.27424849	8	85	Chr8.5105036	Chr8.3532586	5.8327	1.3628	5.2726	-5.5548	-6.0274
137	ZnPR-kh20	5	110	Chr5.14288078	Chr5.24423261	8	85	Chr8.5105036	Chr8.3532586	6.6159	1.2919	-5.4522	-5.5105	5.8416
138	ZnPR-kh20	6	185	Chr6.30978166	Chr6.30940128	8	145	Chr8.10695241	Chr8.5155671	5.6287	1.2771	-5.3779	-5.6377	5.6996
139	ZnPR-kh20	7	40	Chr7.16541978	Chr7.14229996	8	145	Chr8.10695241	Chr8.5155671	5.7177	1.2921	-5.2593	-5.7369	5.7557
140	ZnPR-kh20	6	185	Chr6.30978166	Chr6.30940128	9	0	Chr9.16714820	Chr9.16563040	6.5055	1.2895	-5.3363	5.5592	-5.7975
141	ZnPR-kh20	4	20	Chr4.24786373	Chr4.33251627	9	100	Chr9.22047584	Chr9.22247246	5.2821	2.0184	-2.7181	-2.7789	3.2497
142	ZnPR-kh20	8	20	Chr8.24408601	Chr8.27101175	9	100	Chr9.22047584	Chr9.22247246	5.2616	2.0048	-3.1608	-2.6393	2.872
143	ZnPR-kh20	3	145	Chr3.32176877	Chr3.962276	9	105	Chr9.22247254	Chr9.21554288	5.5446	1.912	3.298	-2.9079	-2.9978
144	ZnPR-kh20	5	105	Chr5.29346607	Chr5.14288078	9	130	Chr9.18684863	Chr9.18915073	6.6512	1.4698	-4.4009	6.4886	-6.5847
145	ZnPR-kh20	9	235	Chr9.9387676	Chr9.7256130	9	240	Chr9.7256130	Chr9.10643350	5.6635	2.365	-3.7016	3.2076	-7.7478
146	ZnPR-kh20	7	35	Chr7.17377837	Chr7.16541978	10	35	Chr10.1472119	Chr10.1543533	5.2519	1.8522	-3.757	5.1777	-7.3954
147	ZnPR-kh20	4	75	Chr4.34871830	Chr4.26457631	10	80	Chr10.5341194	Chr10.11646220	7.0299	1.5744	3.6513	-3.7978	-4.5967
148	ZnPR-kh20	5	120	Chr5.24649725	Chr5.24499435	10	80	Chr10.5341194	Chr10.11646220	6.5023	1.4071	2.3844	-2.3048	-3.8613
149	ZnPR-kh20	9	140	Chr9.17610294	Chr9.17574808	10	80	Chr10.5341194	Chr10.11646220	6.7552	1.4266	4.2005	-3.9916	-4.1476
150	ZnPR-kh20	1	160	Chr1.5234872	Chr1.5735150	10	85	Chr10.11836920	Chr10.5440832	6.2987	1.3111	-5.863	-5.2107	5.5476
151	ZnPR-kh20	2	250	Chr2.24112841	Chr2.21558376	10	85	Chr10.11836920	Chr10.5440832	7.155	1.3781	-5.3983	-5.3658	6.0701
152	ZnPR-kh20	3	35	Chr3.20618562	Chr3.20618568	10	85	Chr10.11836920	Chr10.5440832	6.6355	1.3059	-5.5465	-5.383	5.8713
153	ZnPR-kh20	6	200	Chr6.29953577	Chr6.30034467	10	85	Chr10.11836920	Chr10.5440832	6.8277	1.3042	-5.5253	-5.4175	5.889
154	ZnPR-kh20	8	85	Chr8.5105036	Chr8.3532586	10	85	Chr10.11836920	Chr10.5440832	7.139	1.3151	-5.5088	-5.3892	5.9063
155	ZnPR-kh20	10	45	Chr10.5415122	Chr10.6735797	10	150	Chr10.19304599	Chr10.19575461	5.1297	1.2867	-5.3038	5.7033	-5.6594
156	ZnPR-kh20	10	65	Chr10.18122916	Chr10.17994542	11	25	Chr11.18121069	Chr11.27200167	5.6995	1.5671	-5.1119	5.4626	-6.4099
157	ZnPR-kh20	3	70	Chr3.17020332	Chr3.16726556	11	55	Chr11.25186904	Chr11.23220554	5.4701	1.8176	-2.9065	-3.0477	3.2299
158	ZnPR-kh20	6	195	Chr6.28684145	Chr6.30895032	11	100	Chr11.18528369	Chr11.19039587	5.2318	1.1149	-3.5832	-3.4499	4.0913
159	ZnPR-kh20	7	40	Chr7.16541978	Chr7.14229996	11	100	Chr11.18528369	Chr11.19039587	6.0475	1.3141	-5.3628	-5.5685	5.971
160	ZnPR-kh20	1	35	Chr1.28202918	Chr1.27424849	11	105	Chr11.19039587	Chr11.8726410	6.3265	1.401	5.2571	-5.4845	-6.1183
161	ZnPR-kh20	5	110	Chr5.14288078	Chr5.24423261	11	105	Chr11.19039587	Chr11.8726410	7.0041	1.3125	-5.4521	-5.4543	5.9113
162	ZnPR-kh20	5	105	Chr5.29346607	Chr5.14288078	12	0	Chr12.14104199	Chr12.17575057	7.1979	1.5453	-4.3326	6.2727	-6.7738
163	ZnPR-kh20	7	35	Chr7.17377837	Chr7.16541978	12	0	Chr12.14104199	Chr12.17575057	5.601	1.5063	-4.5753	5.9574	-6.5092
164	ZnPR-kh20	4	15	Chr4.24786373	Chr4.33251627	12	105	Chr12.2323351	Chr12.23029491	5.4255	2.0369	-2.3677	-3.0717	3.366
165	ZnPR-kh20	3	70	Chr3.17020332	Chr3.16726556	12	110	Chr12.2323351	Chr12.23029491	5.3921	1.8117	-2.8698	-3.1477	3.1107
166	ZnPR-kh20	10	80	Chr10.5341194	Chr10.11646220	12	125	Chr12.2323351	Chr12.23029491	5.645	1.4185	-3.6794	3.9236	-4.0199
167	ZnPR-kh20	11	100	Chr11.18528369	Chr11.19039587	12	130	Chr12.2323351	Chr12.23029491	5.5889	1.286	-5.3715	5.576	-5.7461
168	FeBR-kh20	4	30	Chr4.24786373	Chr4.33251627	5	130	Chr5.23987440	Chr5.23769760	5.2151	16.1628	0.5755	0.058	-0.8785
169	ZnPR-Rb20	5	90	Chr5.18990012	Chr5.18698826	10	155	Chr10.19304599	Chr10.19575461	5.1051	12.1488	-2.0482	1.8812	-2.5673
170	ZnPR-Rb20	7	175	Chr7.7815156	Chr7.8184961	11	25	Chr11.18121069	Chr11.27200167	5.5022	17.2369	-1.5073	1.4879	-2.8743

## Sheet: Table S2_Genes in 3 QTL regions
S.No	QTL	chr	locus	start	stop	Gene Description	List of genes in identified QTL regions in Chr 2,9,6
1	qZnBR.2.1	LG02	LOC_Os02g40040	24240087	24242558	expressed protein
2			LOC_Os02g40050	24254304	24255026	retrotransposon protein, putative, unclassified
3			LOC_Os02g40060	24256058	24257455	retrotransposon protein, putative, unclassified
4			LOC_Os02g40070	24261671	24266297	AP2-like ethylene-responsive transcription factor PLETHORA 2, putative, expressed
5			LOC_Os02g40080	24268151	24270021	tic20, putative, expressed
6			LOC_Os02g40090	24270234	24273675	transporter-related, putative, expressed
7			LOC_Os02g40090	24270234	24273561	transporter-related, putative, expressed
8			LOC_Os02g40090	24270234	24273525	transporter-related, putative, expressed
9			LOC_Os02g40090	24270239	24273674	transporter-related, putative, expressed
10			LOC_Os02g40100	24276308	24281041	plant protein of unknown function DUF869 domain containing protein, expressed
11			LOC_Os02g40110	24283189	24284804	expressed protein
12			LOC_Os02g40120	24288819	24289641	expressed protein
13			LOC_Os02g40130	24293135	24293959	leucine-rich, putative, expressed
14			LOC_Os02g40140	24299926	24302290	transposon protein, putative, unclassified, expressed
15			LOC_Os02g40150	24305367	24306160	retrotransposon protein, putative, unclassified, expressed
16			LOC_Os02g40160	24307348	24308709	retrotransposon protein, putative, unclassified
17			LOC_Os02g40170	24311826	24312619	retrotransposon protein, putative, unclassified, expressed
18			LOC_Os02g40180	24315760	24318863	receptor-like protein kinase 5 precursor, putative, expressed
19			LOC_Os02g40190	24323432	24324493	receptor kinase, putative, expressed
20			LOC_Os02g40200	24327114	24331291	receptor-like protein kinase precursor, putative, expressed
21			LOC_Os02g40210	24332409	24333029	expressed protein
22			LOC_Os02g40220	24333632	24334672	retrotransposon protein, putative, Ty1-copia subclass, expressed
23			LOC_Os02g40230	24335043	24338983	retrotransposon protein, putative, Ty1-copia subclass, expressed
24			LOC_Os02g40240	24350428	24354694	receptor kinase, putative, expressed
25			LOC_Os02g40240	24350428	24354694	receptor kinase, putative, expressed
26			LOC_Os02g40250	24361094	24369644	retrotransposon protein, putative, unclassified, expressed
27			LOC_Os02g40260	24372805	24374496	uncharacterized protein At4g06744 precursor, putative, expressed
28			LOC_Os02g40270	24380891	24382673	expressed protein
29			LOC_Os02g40280	24390731	24396384	piwi domain containing protein, putative, expressed
30			LOC_Os02g40300	24397531	24398769	retrotransposon protein, putative, unclassified, expressed
31			LOC_Os02g40310	24400323	24403201	retrotransposon protein, putative, unclassified, expressed
32			LOC_Os02g40320	24403529	24408504	PINHEAD, putative, expressed
33			LOC_Os02g40330	24409309	24414084	retrotransposon protein, putative, Ty3-gypsy subclass, expressed
34			LOC_Os02g40330	24409317	24414084	retrotransposon protein, putative, Ty3-gypsy subclass, expressed
35			LOC_Os02g40330	24410165	24414084	retrotransposon protein, putative, Ty3-gypsy subclass, expressed
36			LOC_Os02g40340	24432051	24435197	expressed protein
37			LOC_Os02g40340	24432055	24435197	expressed protein
38			LOC_Os02g40350	24435939	24438119	transposon protein, putative, unclassified, expressed
39			LOC_Os02g40360	24440684	24446952	retrotransposon protein, putative, unclassified, expressed
40			LOC_Os02g40370	24450180	24450419	retrotransposon protein, putative, unclassified
41			LOC_Os02g40380	24450783	24451115	retrotransposon protein, putative, unclassified
42			LOC_Os02g40390	24451753	24457908	retrotransposon protein, putative, unclassified, expressed
43			LOC_Os02g40400	24462248	24467715	expressed protein
44			LOC_Os02g40410	24471544	24477323	expressed protein
45			LOC_Os02g40410	24471545	24475653	expressed protein
46			LOC_Os02g40420	24482990	24487434	expressed protein
47			LOC_Os02g40430	24489115	24501837	HEAT repeat family protein, putative, expressed
48			LOC_Os02g40440	24516374	24518200	GDSL-like lipase/acylhydrolase, putative, expressed
49			LOC_Os02g40450	24518227	24527233	DEAD/DEAH box helicase domain containing protein, expressed
50			LOC_Os02g40454	24526907	24530961	serine/threonine protein phosphatase 2A 55 kDa regulatory subunit B, putative, expressed
51			LOC_Os02g40454	24526907	24530961	serine/threonine protein phosphatase 2A 55 kDa regulatory subunit B, putative, expressed
52			LOC_Os02g40460	24531291	24534829	S1 RNA binding domain containing protein, expressed
53			LOC_Os02g40470	24541038	24542696	retrotransposon protein, putative, unclassified, expressed
54			LOC_Os02g40480	24545445	24548588	transposon protein, putative, unclassified, expressed
55			LOC_Os02g40490	24560176	24563246	expressed protein
56			LOC_Os02g40500	24566319	24568216	OsGrx_C2.1 - glutaredoxin subgroup I, expressed
57			LOC_Os02g40510	24569294	24572560	response regulator receiver domain containing protein, expressed
58			LOC_Os02g40514	24573390	24575337	h/ACA ribonucleoprotein complex subunit 3, putative, expressed
59			LOC_Os02g40514	24573390	24575344	h/ACA ribonucleoprotein complex subunit 3, putative, expressed
60			LOC_Os02g40520	24577977	24578396	expressed protein
61			LOC_Os02g40530	24580382	24582527	MYB family transcription factor, putative, expressed
62			LOC_Os02g40540	24592336	24593477	expressed protein
63			LOC_Os02g40550	24595175	24596968	Lung seven transmembrane receptor domain containing protein, putative, expressed
64			LOC_Os02g40560	24597170	24597886	expressed protein
65			LOC_Os02g40570	24599772	24605729	retrotransposon protein, putative, Ty3-gypsy subclass, expressed
66			LOC_Os02g40580	24611775	24618279	retrotransposon protein, putative, Ty3-gypsy subclass, expressed
67			LOC_Os02g40590	24624747	24625385	expressed protein
68			LOC_Os02g40600	24627210	24627944	expressed protein
69			LOC_Os02g40610	24628895	24631310	expressed protein
70			LOC_Os02g40620	24631805	24632548	expressed protein
71			LOC_Os02g40630	24635562	24635999	expressed protein
72			LOC_Os02g40640	24641283	24641981	expressed protein
73			LOC_Os02g40650	24643393	24644058	expressed protein
74			LOC_Os02g40664	24645498	24651204	zinc finger family protein, putative, expressed
75			LOC_Os02g40680	24667251	24670792	mis12 protein, expressed
76			LOC_Os02g40690	24671195	24671954	expressed protein
77			LOC_Os02g40700	24676363	24677364	enzyme of the cupin superfamily protein, putative, expressed
78			LOC_Os02g40710	24683633	24685205	ammonium transporter protein, putative, expressed
79			LOC_Os02g40720	24686785	24687580	expressed protein
80			LOC_Os02g40730	24690884	24692884	ammonium transporter protein, putative, expressed
81			LOC_Os02g40750	24696856	24698448	pentatricopeptide domain containing protein, putative, expressed
82			LOC_Os02g40760	24700974	24701678	expressed protein
83			LOC_Os02g40770	24707985	24717301	SET domain containing protein, expressed
84			LOC_Os02g40770	24708074	24717301	SET domain containing protein, expressed
85			LOC_Os02g40784	24718047	24724120	WAX2, putative, expressed
86			LOC_Os02g40784	24718047	24724104	WAX2, putative, expressed
87			LOC_Os02g40800	24724834	24725502	expressed protein
88			LOC_Os02g40810	24728245	24733171	Zinc finger, ZZ type domain containing protein, expressed
89			LOC_Os02g40820	24736978	24739293	expressed protein
90			LOC_Os02g40820	24738041	24739293	expressed protein
91			LOC_Os02g40830	24741749	24747965	succinyl-CoA ligase beta-chain, mitochondrial precursor, putative, expressed
92			LOC_Os02g40830	24741749	24747965	succinyl-CoA ligase beta-chain, mitochondrial precursor, putative, expressed
93			LOC_Os02g40830	24742589	24747965	succinyl-CoA ligase beta-chain, mitochondrial precursor, putative, expressed
94			LOC_Os02g40840	24749442	24754919	alcohol oxidase, putative, expressed
95			LOC_Os02g40850	24762747	24765292	retrotransposon protein, putative, unclassified
96			LOC_Os02g40860	24766807	24772750	CK1_CaseinKinase_1.5 - CK1 includes the casein kinase 1 kinases, expressed
97			LOC_Os02g40870	24773421	24775040	phosphatidylinositol N-acetylglucosaminyltransferase subunit C, putative, expressed
98			LOC_Os02g40870	24773421	24775080	phosphatidylinositol N-acetylglucosaminyltransferase subunit C, putative, expressed
99			LOC_Os02g40880	24777727	24779637	ribosomal protein L14, putative, expressed
100			LOC_Os02g40880	24777727	24779637	ribosomal protein L14, putative, expressed
101			LOC_Os02g40890	24780566	24782489	GLTP domain containing protein, putative, expressed
102			LOC_Os02g40900	24783195	24786565	RNA recognition motif containing protein, putative, expressed
103			LOC_Os02g40910	24789531	24790065	hypothetical protein
104			LOC_Os02g40920	24795232	24798456	transposon protein, putative, CACTA, En/Spm sub-class, expressed
105			LOC_Os02g40930	24801352	24804309	transposon protein, putative, CACTA, En/Spm sub-class
106			LOC_Os02g40940	24807321	24811866	expressed protein
107			LOC_Os02g40950	24812593	24815335	transposon protein, putative, unclassified, expressed
108			LOC_Os02g41450	24816732	24819818	no apical meristem protein, putative, expressed
109			LOC_Os02g41460	24830541	24832108	DUF640 domain containing protein, putative, expressed
110			LOC_Os02g41470	24848174	24860112	tRNA synthetases class II domain containing protein, expressed
111			LOC_Os02g41470	24848175	24860095	tRNA synthetases class II domain containing protein, expressed
112			LOC_Os02g41470	24848175	24860095	tRNA synthetases class II domain containing protein, expressed
113			LOC_Os02g41480	24862203	24864799	OsWAK12 - OsWAK receptor-like cytoplasmic kinase OsWAK-RLCK, expressed
114			LOC_Os02g41490	24866771	24867775	expressed protein
115			LOC_Os02g41500	24871746	24874211	OsWAK13 - OsWAK receptor-like protein kinase, expressed
116			LOC_Os02g41510	24878775	24879934	MYB family transcription factor, putative, expressed
117			LOC_Os02g41520	24899523	24905062	glycosyl transferase 8 domain containing protein, putative, expressed
118			LOC_Os02g41530	24908095	24908543	expressed protein
119			LOC_Os02g41540	24911511	24912008	retrotransposon protein, putative, unclassified, expressed
120			LOC_Os02g41550	24915862	24922079	FAD binding domain of DNA photolyase domain containing protein, expressed
121			LOC_Os02g41550	24915862	24922099	FAD binding domain of DNA photolyase domain containing protein, expressed
122			LOC_Os02g41550	24915873	24922099	FAD binding domain of DNA photolyase domain containing protein, expressed
123			LOC_Os02g41550	24915990	24922099	FAD binding domain of DNA photolyase domain containing protein, expressed
124			LOC_Os02g41560	24923868	24925349	pentatricopeptide, putative, expressed
125			LOC_Os02g41570	24929804	24930299	expressed protein
126			LOC_Os02g41580	24934934	24936468	CAMK_CAMK_like.14 - CAMK includes calcium/calmodulin depedent protein kinases, expressed
127			LOC_Os02g41590	24940446	24946648	kinase, pfkB family, putative, expressed
128			LOC_Os02g41610	24953147	24960258	expressed protein
129			LOC_Os02g41620	24962439	24962880	hypothetical protein
130			LOC_Os02g41630	24973386	24977336	phenylalanine ammonia-lyase, putative, expressed
131			LOC_Os02g41640	24980704	24981717	transposon protein, putative, unclassified, expressed
132			LOC_Os02g41650	24984871	24989388	phenylalanine ammonia-lyase, putative, expressed
133			LOC_Os02g41650	24985255	24987550	phenylalanine ammonia-lyase, putative, expressed
134			LOC_Os02g41650	24985255	24989388	phenylalanine ammonia-lyase, putative, expressed
135			LOC_Os02g41670	24992827	24995414	phenylalanine ammonia-lyase, putative, expressed
136			LOC_Os02g41680	25006467	25009121	phenylalanine ammonia-lyase, putative, expressed
137			LOC_Os02g41690	25032217	25035059	retrotransposon protein, putative, unclassified, expressed
138			LOC_Os02g41696	25036493	25037608	retrotransposon protein, putative, unclassified, expressed
139			LOC_Os02g41702	25038155	25040362	retrotransposon protein, putative, unclassified, expressed
140			LOC_Os02g41710	25052171	25055256	cyclic nucleotide-gated ion channel, putative, expressed
141			LOC_Os02g41720	25074316	25083220	transposon protein, putative, unclassified, expressed
142			LOC_Os02g41730	25087539	25088644	retrotransposon protein, putative, Ty3-gypsy subclass
143			LOC_Os02g41740	25092534	25097044	retrotransposon protein, putative, Ty3-gypsy subclass, expressed
144			LOC_Os02g41750	25101145	25102301	transposon protein, putative, unclassified
145			LOC_Os02g41760	25103334	25105616	NB-ARC domain containing protein, expressed
146			LOC_Os02g41770	25109674	25113176	uncharacterized protein PA4923, putative, expressed
147			LOC_Os02g41780	25119033	25122992	transporter-related, putative, expressed
148			LOC_Os02g41790	25123547	25124742	transposon protein, putative, Ac/Ds sub-class
149			LOC_Os02g41800	25133442	25136111	auxin response factor, putative, expressed
150			LOC_Os02g41800	25133442	25136111	auxin response factor, putative, expressed
151			LOC_Os02g41810	25145462	25145722	expressed protein
152			LOC_Os02g41820	25146945	25148945	expressed protein
153			LOC_Os02g41830	25150451	25151106	expressed protein
154			LOC_Os02g41840	25153199	25154265	DUF584 domain containing protein, putative, expressed
155			LOC_Os02g41850	25156549	25161462	expressed protein
156			LOC_Os02g41860	25162543	25166550	aquaporin protein, putative, expressed
157			LOC_Os02g41860	25162543	25166617	aquaporin protein, putative, expressed
158			LOC_Os02g41860	25162874	25163965	aquaporin protein, putative, expressed
159			LOC_Os02g41860	25162874	25165844	aquaporin protein, putative, expressed
160			LOC_Os02g41870	25167258	25174175	transposon protein, putative, unclassified, expressed
161			LOC_Os02g41880	25175415	25175666	expressed protein
162			LOC_Os02g41890	25176090	25179701	phytosulfokine receptor precursor, putative, expressed
163			LOC_Os02g41900	25180740	25182491	expressed protein
164			LOC_Os02g41904	25190484	25191221	DEF7 - Defensin and Defensin-like DEFL family, expressed
165			LOC_Os02g41910	25191799	25193315	OsFBO12 - F-box and other domain containing protein, expressed
166			LOC_Os02g41920	25194429	25194887	white-brown complex homolog protein 8, putative, expressed
167			LOC_Os02g41930	25195759	25196955	OsFBX57 - F-box domain containing protein, expressed
168			LOC_Os02g41940	25197094	25198731	retrotransposon protein, putative, unclassified, expressed
169			LOC_Os02g41954	25199386	25203742	gibberellin 2-beta-dioxygenase 7, putative, expressed
170			LOC_Os02g41954	25200605	25203742	gibberellin 2-beta-dioxygenase 7, putative, expressed
171			LOC_Os02g41961	25211732	25216423	expressed protein
172			LOC_Os02g41970	25220962	25223008	retrotransposon, putative, centromere-specific
173			LOC_Os02g41980	25229203	25229673	expressed protein
174			LOC_Os02g41990	25231647	25239274	expressed protein
175			LOC_Os02g41990	25231647	25236434	expressed protein
176			LOC_Os02g42000	25239748	25241501	expressed protein
177			LOC_Os02g42020	25242411	25255337	expressed protein
178			LOC_Os02g42020	25242411	25256486	expressed protein
179			LOC_Os02g42020	25251009	25256486	expressed protein
180			LOC_Os02g42030	25262160	25262358	hypothetical protein
181			LOC_Os02g42040	25273044	25284061	MIF4G domain containing protein, putative, expressed
182			LOC_Os02g42050	25284993	25285310	expressed protein
183			LOC_Os02g42060	25286937	25287918	response regulator receiver domain containing protein, expressed
184			LOC_Os02g42070	25290616	25291047	retrotransposon protein, putative, Ty3-gypsy subclass
185			LOC_Os02g42080	25292954	25299091	retrotransposon protein, putative, Ty3-gypsy subclass, expressed
186			LOC_Os02g42090	25299939	25300370	retrotransposon protein, putative, Ty3-gypsy subclass
187			LOC_Os02g42100	25305907	25309794	expressed protein
188			LOC_Os02g42110	25317197	25321441	wall-associated receptor kinase-like 22 precursor, putative, expressed
189			LOC_Os02g42120	25322925	25323317	expressed protein
190			LOC_Os02g42134	25329183	25341941	ARF GTPase-activating domain-containing protein, putative, expressed
191			LOC_Os02g42150	25348221	25351598	OsWAK14 - OsWAK receptor-like protein kinase, expressed
192			LOC_Os02g42150	25348221	25351742	OsWAK14 - OsWAK receptor-like protein kinase, expressed
193			LOC_Os02g42160	25356746	25360011	OsWAK15 - OsWAK receptor-like protein kinase, expressed
194			LOC_Os02g42170	25364634	25365667	phospholipase, putative, expressed
195			LOC_Os02g42180	25366940	25371765	retrotransposon protein, putative, unclassified, expressed
196			LOC_Os02g42190	25374692	25377893	OsWAK16 - OsWAK receptor-like protein kinase, expressed
197			LOC_Os02g42200	25379779	25392811	transcription factor-related, putative, expressed
198			LOC_Os02g42200	25383888	25392811	transcription factor-related, putative, expressed
199			LOC_Os02g42210	25392975	25394765	membrane-associated salt-inducible protein like, putative, expressed
200			LOC_Os02g42220	25399803	25404333	transposon protein, putative, unclassified, expressed
201			LOC_Os02g42230	25404409	25408368	RPA2B - Putative single-stranded DNA binding complex subunit 2, expressed
202			LOC_Os02g42250	25411509	25412468	5-azacytidine resistance protein related, putative, expressed
203			LOC_Os02g42270	25414711	25415658	stage II sporulation protein E, putative, expressed
204			LOC_Os02g42280	25423693	25426421	UDP-glucoronosyl/UDP-glucosyl transferase family protein, putative, expressed
205			LOC_Os02g42290	25431277	25433819	OsClp3 - Putative Clp protease homologue, expressed
206			LOC_Os02g42290	25431277	25433780	OsClp3 - Putative Clp protease homologue, expressed
207			LOC_Os02g42290	25431277	25432725	OsClp3 - Putative Clp protease homologue, expressed
208			LOC_Os02g42300	25435053	25439436	expressed protein
209			LOC_Os02g42310	25442875	25450129	OsSCP8 - Putative Serine Carboxypeptidase homologue, expressed
210			LOC_Os02g42310	25447360	25450129	OsSCP8 - Putative Serine Carboxypeptidase homologue, expressed
211			LOC_Os02g42310	25447823	25450129	OsSCP8 - Putative Serine Carboxypeptidase homologue, expressed
212			LOC_Os02g42310	25447849	25450129	OsSCP8 - Putative Serine Carboxypeptidase homologue, expressed
213			LOC_Os02g42314	25450214	25454110	ubiquitin-conjugating enzyme, putative, expressed
214			LOC_Os02g42314	25450892	25454110	ubiquitin-conjugating enzyme, putative, expressed
215			LOC_Os02g42320	25454224	25458627	peptidase, T1 family, putative, expressed
216			LOC_Os02g42320	25454224	25458627	peptidase, T1 family, putative, expressed
217			LOC_Os02g42320	25454224	25458215	peptidase, T1 family, putative, expressed
218			LOC_Os02g42320	25454224	25458627	peptidase, T1 family, putative, expressed
219			LOC_Os02g42330	25459397	25462730	nitrilase, putative, expressed
220			LOC_Os02g42330	25459466	25462730	nitrilase, putative, expressed
221			LOC_Os02g42340	25463714	25464158	conserved hypothetical protein
222			LOC_Os02g42350	25465706	25469618	nitrilase, putative, expressed
223			LOC_Os02g42350	25465734	25468567	nitrilase, putative, expressed
224			LOC_Os02g42360	25480888	25481955	expressed protein
225			LOC_Os02g42370	25488084	25491732	receptor-like protein kinase 2 precursor, putative, expressed
226			LOC_Os02g42374	25491955	25494117	e2f-associated phosphoprotein, putative, expressed
227			LOC_Os02g42374	25491956	25494062	e2f-associated phosphoprotein, putative, expressed
228			LOC_Os02g42374	25491956	25494117	e2f-associated phosphoprotein, putative, expressed
229			LOC_Os02g42374	25491974	25494117	e2f-associated phosphoprotein, putative, expressed
230			LOC_Os02g42374	25493119	25494117	e2f-associated phosphoprotein, putative, expressed
231			LOC_Os02g42380	25497325	25498429	TCP family transcription factor, putative, expressed
232			LOC_Os02g42390	25504647	25505912	expressed protein
233			LOC_Os02g42400	25508403	25508925	bolA-like family protein, putative, expressed
234			LOC_Os02g42406	25510873	25513587	DEAD-box ATP-dependent RNA helicase, putative, expressed
235			LOC_Os02g42412	25514508	25515647	F-box/LRR-repeat protein 2, putative, expressed
236			LOC_Os02g42420	25518332	25522254	retrotransposon protein, putative, unclassified, expressed
237			LOC_Os02g42430	25523466	25524380	GEM, putative, expressed
238			LOC_Os02g42440	25527601	25529056	GEM, putative, expressed
239			LOC_Os02g42450	25539458	25540426	RIPER1 - Ripening-related family protein precursor, expressed
240			LOC_Os02g42460	25543368	25547409	retrotransposon protein, putative, unclassified
241			LOC_Os02g42470	25550573	25550818	expressed protein
242			LOC_Os02g42497	25561822	25562683	expressed protein
243			LOC_Os02g42506	25564010	25564587	hypothetical protein
244			LOC_Os02g42520	25565860	25569036	dehydrogenase, putative, expressed
245			LOC_Os02g42520	25565860	25569036	dehydrogenase, putative, expressed
246			LOC_Os02g42530	25569174	25574863	expressed protein
247			LOC_Os02g42530	25569174	25574908	expressed protein
248			LOC_Os02g42530	25569174	25574863	expressed protein
249			LOC_Os02g42540	25576772	25579174	expressed protein
250			LOC_Os02g42550	25579455	25582099	expressed protein
251			LOC_Os02g42560	25583470	25585697	expressed protein
252			LOC_Os02g42570	25589926	25590804	ferredoxin-thioredoxin reductase, variable chain, putative, expressed
253			LOC_Os02g42580	25591926	25595149	vacuolar protein-sorting protein bro1, putative, expressed
254			LOC_Os02g42585	25595412	25597607	AP2 domain containing protein, expressed
255			LOC_Os02g42590	25619021	25624875	WD-40 repeat family protein, putative, expressed
256			LOC_Os02g42590	25619021	25622078	WD-40 repeat family protein, putative, expressed
257			LOC_Os02g42590	25619021	25624875	WD-40 repeat family protein, putative, expressed
258			LOC_Os02g42600	25626748	25636072	double-stranded RNA binding motif containing protein, expressed
259			LOC_Os02g42610	25638202	25638628	expressed protein
260			LOC_Os02g42620	25639087	25641155	protein kinase, putative, expressed
261			LOC_Os02g42630	25644536	25644974	expressed protein
262			LOC_Os02g42640	25646625	25648091	CBS domain-containing protein, putative, expressed
263			LOC_Os02g42650	25652321	25659494	expansin precursor, putative, expressed
264			LOC_Os02g42660	25660296	25664363	sphingolipid delta desaturase, putative, expressed
265			LOC_Os02g42670	25665013	25673252	DUF1771 domain containing protein, putative, expressed
266			LOC_Os02g42690	25671123	25673590	zinc finger, C3HC4 type domain containing protein, expressed
267			LOC_Os02g42690	25671123	25677225	zinc finger, C3HC4 type domain containing protein, expressed
268			LOC_Os02g42690	25671123	25675323	zinc finger, C3HC4 type domain containing protein, expressed
269			LOC_Os02g42700	25679712	25683601	thioredoxin, putative, expressed
1	qZnBR.9.2	Chr 9	LOC_Os09g06450	3034999	3040037	retrotransposon protein, putative, unclassified, expressed
2			LOC_Os09g06464	3048020	3064571	CCT/B-box zinc finger protein, putative, expressed
3			LOC_Os09g06480	3067362	3069573	retrotransposon, putative, centromere-specific
4			LOC_Os09g06499	3073884	3085958	sulfate transporter 4.1, chloroplast precursor, putative, expressed
5			LOC_Os09g06499	3073884	3092870	sulfate transporter 4.1, chloroplast precursor, putative, expressed
6			LOC_Os09g06520	3096690	3100658	expressed protein
7			LOC_Os09g06530	3104108	3105511	expressed protein
8			LOC_Os09g06540	3109254	3111685	retrotransposon protein, putative, unclassified, expressed
9			LOC_Os09g06550	3114277	3115272	retrotransposon protein, putative, unclassified, expressed
10			LOC_Os09g06560	3118920	3125244	WD domain, G-beta repeat domain containing protein, expressed
11			LOC_Os09g06570	3126602	3127160	expressed protein
12			LOC_Os09g06580	3129207	3130193	retrotransposon protein, putative, Ty3-gypsy subclass, expressed
13			LOC_Os09g06590	3131087	3132619	retrotransposon protein, putative, Ty3-gypsy subclass, expressed
14			LOC_Os09g06600	3133719	3136097	retrotransposon protein, putative, Ty3-gypsy subclass, expressed
15			LOC_Os09g06610	3136411	3137990	retrotransposon protein, putative, Ty3-gypsy subclass, expressed
16			LOC_Os09g06620	3139076	3140371	OsFBX307 - F-box domain containing protein, expressed
17			LOC_Os09g06634	3141878	3147421	transposon protein, putative, Pong sub-class, expressed
18			LOC_Os09g06634	3145228	3147421	transposon protein, putative, Pong sub-class, expressed
19			LOC_Os09g06650	3158223	3163276	retrotransposon, putative, centromere-specific, expressed
20			LOC_Os09g06660	3163690	3164915	expressed protein
21			LOC_Os09g06670	3166948	3167453	expressed protein
22			LOC_Os09g06680	3168154	3171995	WD domain, G-beta repeat domain containing protein, expressed
23			LOC_Os09g06690	3180559	3180768	expressed protein
24			LOC_Os09g06700	3185789	3187738	transposon protein, putative, CACTA, En/Spm sub-class
25			LOC_Os09g06710	3190766	3193946	transposon protein, putative, CACTA, En/Spm sub-class, expressed
26			LOC_Os09g06719	3196606	3197534	expressed protein
27			LOC_Os09g06730	3199514	3203704	retrotransposon protein, putative, unclassified, expressed
28			LOC_Os09g06740	3205933	3207190	zinc finger, C3HC4 type domain containing protein, expressed
29			LOC_Os09g06750	3208362	3209057	expressed protein
30			LOC_Os09g06760	3225723	3226754	retrotransposon protein, putative, unclassified, expressed
31			LOC_Os09g06770	3236285	3237000	RING finger protein, putative, expressed
32			LOC_Os09g06780	3240396	3242605	transposon protein, putative, CACTA, En/Spm sub-class, expressed
33			LOC_Os09g06790	3244912	3247962	transposon protein, putative, CACTA, En/Spm sub-class, expressed
34			LOC_Os09g06800	3250591	3254338	retrotransposon protein, putative, Ty3-gypsy subclass, expressed
35			LOC_Os09g06810	3255409	3257860	retrotransposon protein, putative, Ty3-gypsy subclass
36			LOC_Os09g06820	3261024	3263925	retrotransposon protein, putative, Ty3-gypsy subclass, expressed
37			LOC_Os09g06830	3266945	3269225	hypothetical protein
38			LOC_Os09g06840	3271351	3272510	retrotransposon, putative, centromere-specific
39			LOC_Os09g06850	3284992	3285746	retrotransposon protein, putative, Ty3-gypsy subclass
40			LOC_Os09g06860	3287518	3288111	retrotransposon protein, putative, unclassified
41			LOC_Os09g06870	3290248	3292963	retrotransposon protein, putative, unclassified
42			LOC_Os09g06880	3297737	3301226	retrotransposon protein, putative, unclassified
43			LOC_Os09g06890	3303872	3307522	BTB/POZ domain containing protein, expressed
44			LOC_Os09g06900	3318012	3321815	retrotransposon protein, putative, unclassified, expressed
45			LOC_Os09g06910	3325212	3332210	retrotransposon protein, putative, unclassified, expressed
46			LOC_Os09g06920	3335140	3341666	transposon protein, putative, CACTA, En/Spm sub-class, expressed
47			LOC_Os09g06930	3343946	3344222	hypothetical protein
48			LOC_Os09g06940	3345558	3348774	expressed protein
49			LOC_Os09g06950	3355804	3356603	expressed protein
50			LOC_Os09g06960	3362805	3363047	retrotransposon protein, putative, Ty3-gypsy subclass
51			LOC_Os09g06970	3369499	3376004	transport protein particle component, Bet3, domain containing protein, expressed
52			LOC_Os09g06970	3369503	3376004	transport protein particle component, Bet3, domain containing protein, expressed
53			LOC_Os09g06970	3369503	3376004	transport protein particle component, Bet3, domain containing protein, expressed
54			LOC_Os09g06990	3387610	3387951	retrotransposon protein, putative, Ty3-gypsy subclass
55			LOC_Os09g07000	3389902	3397159	retrotransposon protein, putative, Ty3-gypsy subclass, expressed
56			LOC_Os09g07010	3399181	3403109	retrotransposon protein, putative, unclassified, expressed
57			LOC_Os09g07020	3404354	3408176	oxidoreductase, putative, expressed
58			LOC_Os09g07020	3404354	3408176	oxidoreductase, putative, expressed
59			LOC_Os09g07030	3408880	3409122	expressed protein
60			LOC_Os09g07040	3412226	3412534	retrotransposon protein, putative, Ty3-gypsy subclass
61			LOC_Os09g07050	3415876	3416427	retrotransposon, putative, centromere-specific, expressed
62			LOC_Os09g07060	3419744	3422708	retrotransposon protein, putative, unclassified, expressed
63			LOC_Os09g07070	3427082	3431880	retrotransposon protein, putative, Ty3-gypsy subclass, expressed
64			LOC_Os09g07080	3436660	3439394	retrotransposon protein, putative, Ty3-gypsy subclass, expressed
65			LOC_Os09g07090	3441945	3443759	retrotransposon protein, putative, unclassified
66			LOC_Os09g07100	3446667	3447026	hypothetical protein
67			LOC_Os09g07110	3450033	3454056	retrotransposon protein, putative, unclassified
68			LOC_Os09g07120	3456030	3467826	DNA-directed RNA polymerase 1B, mitochondrial precursor, putative, expressed
69			LOC_Os09g07120	3456030	3467826	DNA-directed RNA polymerase 1B, mitochondrial precursor, putative, expressed
70			LOC_Os09g07130	3482721	3485685	retrotransposon protein, putative, unclassified, expressed
71			LOC_Os09g07140	3486176	3488666	retrotransposon protein, putative, Ty3-gypsy subclass, expressed
72			LOC_Os09g07150	3490918	3491847	expressed protein
73			LOC_Os09g07154	3493993	3496469	expressed protein
74			LOC_Os09g07160	3500534	3505050	expressed protein
75			LOC_Os09g07170	3509853	3518481	retrotransposon protein, putative, unclassified, expressed
76			LOC_Os09g07180	3518951	3522519	retrotransposon protein, putative, unclassified, expressed
77			LOC_Os09g07190	3523247	3524032	retrotransposon protein, putative, unclassified
78			LOC_Os09g07200	3525023	3526519	transposon protein, putative, unclassified, expressed
79			LOC_Os09g07220	3532749	3534473	retrotransposon protein, putative, unclassified, expressed
80			LOC_Os09g07230	3535759	3543841	retrotransposon protein, putative, unclassified, expressed
81			LOC_Os09g07240	3549186	3550582	retrotransposon protein, putative, Ty3-gypsy subclass, expressed
82			LOC_Os09g07250	3556766	3559573	retrotransposon protein, putative, unclassified, expressed
83			LOC_Os09g07260	3559989	3560863	retrotransposon protein, putative, Ty3-gypsy subclass
84			LOC_Os09g07270	3561254	3565646	retrotransposon protein, putative, Ty3-gypsy subclass, expressed
85			LOC_Os09g07280	3577888	3580495	expressed protein
86			LOC_Os09g07290	3581289	3586049	GDSL-like lipase/acylhydrolase, putative, expressed
87			LOC_Os09g07294	3586600	3589801	purity of essence, putative, expressed
88			LOC_Os09g07300	3590118	3607830	BIG, putative, expressed
89			LOC_Os09g07310	3613475	3614459	retrotransposon protein, putative, Ty3-gypsy subclass
90			LOC_Os09g07320	3620063	3633216	ethanol tolerance protein GEKO1, putative, expressed
91			LOC_Os09g07320	3620063	3633216	ethanol tolerance protein GEKO1, putative, expressed
92			LOC_Os09g07330	3644247	3649207	transposon protein, putative, CACTA, En/Spm sub-class, expressed
93			LOC_Os09g07340	3650452	3653624	transposon protein, putative, CACTA, En/Spm sub-class, expressed
94			LOC_Os09g07350	3654972	3658804	fasciclin-like arabinogalactan protein 8 precursor, putative, expressed
95			LOC_Os09g07360	3656769	3665430	frigida, putative, expressed
96			LOC_Os09g07360	3660372	3665430	frigida, putative, expressed
97			LOC_Os09g07360	3661851	3665430	frigida, putative, expressed
98			LOC_Os09g07370	3666875	3667428	hypothetical protein
99			LOC_Os09g07380	3669979	3675560	frigida, putative, expressed
100			LOC_Os09g07390	3676722	3677558	expressed protein
101			LOC_Os09g07400	3679241	3681586	retrotransposon protein, putative, unclassified, expressed
102			LOC_Os09g07410	3682265	3687451	retrotransposon protein, putative, unclassified, expressed
103			LOC_Os09g07420	3694945	3701327	retrotransposon protein, putative, unclassified, expressed
104			LOC_Os09g07430	3710692	3715437	retrotransposon, putative, centromere-specific, expressed
105			LOC_Os09g07440	3719390	3724265	retrotransposon protein, putative, unclassified, expressed
106			LOC_Os09g07450	3726392	3730896	flavonol synthase, putative, expressed
107			LOC_Os09g07460	3732398	3734886	kelch repeat protein, putative, expressed
108			LOC_Os09g07470	3742150	3742637	hypothetical protein
109			LOC_Os09g07480	3745683	3749470	membrane associated DUF588 domain containing protein, putative, expressed
110			LOC_Os09g07490	3750054	3750551	expressed protein
111			LOC_Os09g07500	3751007	3753652	expressed protein
112			LOC_Os09g07500	3751007	3754991	expressed protein
113			LOC_Os09g07500	3751007	3753649	expressed protein
114			LOC_Os09g07510	3757920	3764491	HEAT repeat family protein, putative, expressed
115			LOC_Os09g07510	3757926	3764481	HEAT repeat family protein, putative, expressed
116			LOC_Os09g07510	3757934	3764491	HEAT repeat family protein, putative, expressed
117			LOC_Os09g07520	3770533	3770862	expressed protein
118			LOC_Os09g07530	3772215	3774590	retrotransposon protein, putative, unclassified
119			LOC_Os09g07540	3778505	3783048	retrotransposon protein, putative, unclassified, expressed
120			LOC_Os09g07550	3786706	3787191	retrotransposon protein, putative, unclassified
121			LOC_Os09g07560	3789336	3789870	expressed protein
122			LOC_Os09g07570	3792262	3796371	ferredoxin-thioredoxin reductase catalytic chain, chloroplast precursor, putative, expressed
123			LOC_Os09g07570	3792271	3796371	ferredoxin-thioredoxin reductase catalytic chain, chloroplast precursor, putative, expressed
124			LOC_Os09g07580	3797045	3802606	mla1, putative, expressed
125			LOC_Os09g07590	3803863	3805874	RGH1A, putative, expressed
126			LOC_Os09g07600	3808109	3812110	retrotransposon protein, putative, unclassified, expressed
127			LOC_Os09g07610	3815559	3823844	retrotransposon protein, putative, unclassified, expressed
128			LOC_Os09g07614	3826022	3827027	expressed protein
129			LOC_Os09g07620	3832078	3832681	expressed protein
130			LOC_Os09g07630	3837155	3838172	expressed protein
131			LOC_Os09g07640	3843922	3849038	retrotransposon protein, putative, unclassified, expressed
132			LOC_Os09g07650	3853936	3854370	expressed protein
133			LOC_Os09g07660	3855216	3862968	ELMO/CED-12 family protein, putative, expressed
134			LOC_Os09g07660	3855460	3862968	ELMO/CED-12 family protein, putative, expressed
135			LOC_Os09g07670	3866696	3869751	white-brown complex homolog protein 11, putative, expressed
136			LOC_Os09g07680	3872226	3877559	retrotransposon protein, putative, Ty3-gypsy subclass, expressed
137			LOC_Os09g07690	3878405	3881316	retrotransposon protein, putative, unclassified, expressed
138			LOC_Os09g07700	3887046	3890411	expressed protein
139			LOC_Os09g07720	3895347	3895769	expressed protein
140			LOC_Os09g07730	3898437	3900416	expressed protein
141			LOC_Os09g07740	3908395	3912298	retrotransposon protein, putative, Ty1-copia subclass, expressed
142			LOC_Os09g07750	3917742	3923897	retrotransposon protein, putative, unclassified, expressed
143			LOC_Os09g07760	3924525	3927665	retrotransposon protein, putative, unclassified, expressed
144			LOC_Os09g07764	3929804	3930561	expressed protein
145			LOC_Os09g07770	3931419	3932151	expressed protein
146			LOC_Os09g07780	3935205	3938411	pentatricopeptide repeat protein PPR986-12, putative, expressed
147			LOC_Os09g07790	3943821	3944273	hypothetical protein
148			LOC_Os09g07800	3949844	3953272	expressed protein
149			LOC_Os09g07810	3956029	3957133	hypothetical protein
150			LOC_Os09g07820	3959855	3965192	exosome complex exonuclease, putative, expressed
151			LOC_Os09g07820	3959855	3965192	exosome complex exonuclease, putative, expressed
152			LOC_Os09g07820	3959855	3965192	exosome complex exonuclease, putative, expressed
153			LOC_Os09g07830	3970052	3975828	acetyl-CoA acetyltransferase, cytosolic, putative, expressed
154			LOC_Os09g07830	3970052	3975826	acetyl-CoA acetyltransferase, cytosolic, putative, expressed
155			LOC_Os09g07830	3970052	3975828	acetyl-CoA acetyltransferase, cytosolic, putative, expressed
156			LOC_Os09g07840	3978157	3980103	retrotransposon protein, putative, unclassified, expressed
157			LOC_Os09g07850	3983802	3993543	retrotransposon protein, putative, unclassified, expressed
158			LOC_Os09g07860	3997128	3999649	retrotransposon protein, putative, unclassified
159			LOC_Os09g07870	3999931	4002868	retrotransposon protein, putative, unclassified, expressed
160			LOC_Os09g07880	4004816	4007901	retrotransposon protein, putative, Ty3-gypsy subclass, expressed
161			LOC_Os09g07890	4008882	4014467	retrotransposon protein, putative, Ty3-gypsy subclass, expressed
162			LOC_Os09g07900	4016486	4036019	ubiquitin-protein ligase 1, putative, expressed
163			LOC_Os09g07910	4037616	4038693	DNA-directed RNA polymerase subunit alpha, putative, expressed
164			LOC_Os09g07920	4042693	4045478	NOI protein, nitrate-induced, putative, expressed
165			LOC_Os09g07930	4063778	4068524	retrotransposon protein, putative, unclassified, expressed
166			LOC_Os09g07940	4074208	4077005	retrotransposon protein, putative, unclassified, expressed
167			LOC_Os09g07950	4081684	4084576	retrotransposon protein, putative, unclassified, expressed
168			LOC_Os09g07960	4086082	4093146	retrotransposon protein, putative, Ty3-gypsy subclass, expressed
169			LOC_Os09g07970	4095552	4099209	transposon protein, putative, CACTA, En/Spm sub-class, expressed
170			LOC_Os09g07980	4100992	4105937	transposon protein, putative, CACTA, En/Spm sub-class, expressed
171			LOC_Os09g07990	4114206	4115792	retrotransposon protein, putative, unclassified, expressed
172			LOC_Os09g08000	4118718	4122487	expressed protein
173			LOC_Os09g08010	4125391	4127330	retrotransposon protein, putative, unclassified, expressed
174			LOC_Os09g08020	4128221	4133305	retrotransposon protein, putative, unclassified, expressed
175			LOC_Os09g08030	4135752	4136547	nodulin MtN3 family protein, putative, expressed
176			LOC_Os09g08040	4149189	4152622	retrotransposon protein, putative, Ty3-gypsy subclass, expressed
177			LOC_Os09g08050	4153332	4154255	retrotransposon protein, putative, Ty3-gypsy subclass
178			LOC_Os09g08060	4161660	4162648	retrotransposon protein, putative, Ty3-gypsy subclass, expressed
179			LOC_Os09g08072	4165397	4170978	glycosyl hydrolases, putative, expressed
180			LOC_Os09g08100	4175696	4176079	cysteine proteinase inhibitor precursor, putative, expressed
181			LOC_Os09g08110	4186360	4186842	hypothetical protein
182			LOC_Os09g08120	4190886	4198627	beta-fructofuranosidase, insoluble isoenzyme 7 precursor, putative, expressed
183			LOC_Os09g08130	4201069	4204423	indole-3-glycerol phosphate synthase, chloroplast precursor, putative, expressed
184			LOC_Os09g08130	4201660	4204423	indole-3-glycerol phosphate synthase, chloroplast precursor, putative, expressed
185			LOC_Os09g08140	4212385	4212687	hypothetical protein
186			LOC_Os09g08150	4225923	4226420	expressed protein
187			LOC_Os09g08160	4227428	4229778	plant protein of unknown function domain containing protein, expressed
188			LOC_Os09g08170	4233040	4235194	retrotransposon protein, putative, unclassified, expressed
189			LOC_Os09g08180	4235943	4245725	retrotransposon protein, putative, Ty3-gypsy subclass, expressed
190			LOC_Os09g08190	4250758	4251917	sulfotransferase domain containing protein, expressed
191			LOC_Os09g08210	4257077	4258021	expressed protein
192			LOC_Os09g08224	4261796	4267702	retrotransposon protein, putative, Ty3-gypsy subclass, expressed
193			LOC_Os09g08240	4268223	4271181	retrotransposon protein, putative, unclassified, expressed
194			LOC_Os09g08254	4273509	4275876	expressed protein
195			LOC_Os09g08270	4276123	4276419	nodulin MtN3 family protein, putative, expressed
196			LOC_Os09g08280	4277193	4277778	expressed protein
197			LOC_Os09g08290	4286895	4288615	retrotransposon, putative, centromere-specific, expressed
198			LOC_Os09g08300	4290113	4291626	expressed protein
199			LOC_Os09g08310	4293946	4297916	retrotransposon protein, putative, Ty1-copia subclass, expressed
200			LOC_Os09g08330	4305471	4306088	hypothetical protein
201			LOC_Os09g08340	4310675	4315365	retrotransposon protein, putative, unclassified, expressed
202			LOC_Os09g08350	4319738	4322411	retrotransposon protein, putative, unclassified, expressed
203			LOC_Os09g08360	4329027	4332178	expressed protein
204			LOC_Os09g08370	4338025	4345781	retrotransposon protein, putative, Ty3-gypsy subclass, expressed
205			LOC_Os09g08370	4338025	4345781	retrotransposon protein, putative, Ty3-gypsy subclass, expressed
206			LOC_Os09g08370	4338025	4345781	retrotransposon protein, putative, Ty3-gypsy subclass, expressed
207			LOC_Os09g08379	4348090	4348513	expressed protein
208			LOC_Os09g08390	4349564	4355226	CRAL/TRIO domain containing protein, expressed
209			LOC_Os09g08390	4349564	4353322	CRAL/TRIO domain containing protein, expressed
210			LOC_Os09g08390	4349564	4355226	CRAL/TRIO domain containing protein, expressed
211			LOC_Os09g08390	4350587	4355226	CRAL/TRIO domain containing protein, expressed
212			LOC_Os09g08390	4350616	4355226	CRAL/TRIO domain containing protein, expressed
213			LOC_Os09g08400	4359015	4360123	expressed protein
214			LOC_Os09g08410	4378766	4379171	hypothetical protein
215			LOC_Os09g08420	4382992	4386627	AGC_PVPK_like_kin82y.15 - ACG kinases include homologs to PKA, PKG and PKC, expressed
216			LOC_Os09g08430	4390880	4393872	ribosomal protein L22, putative, expressed
217			LOC_Os09g08440	4401212	4407611	nodulin MtN3 family protein, putative, expressed
218			LOC_Os09g08450	4408658	4411662	ulp1 protease family, C-terminal catalytic domain containing protein, expressed
219			LOC_Os09g08460	4412239	4417051	transposon protein, putative, unclassified, expressed
220			LOC_Os09g08464	4417891	4418372	ATP synthase B chain, putative, expressed
221			LOC_Os09g08470	4420207	4426072	retrotransposon protein, putative, unclassified, expressed
222			LOC_Os09g08480	4426809	4428345	expressed protein
223			LOC_Os09g08490	4429439	4429673	seven-transmembrane-domain protein 1, putative, expressed
224			LOC_Os09g08500	4436298	4438641	expressed protein
225			LOC_Os09g08510	4439508	4441409	transposon protein, putative, Pong sub-class, expressed
226			LOC_Os09g08520	4443720	4444847	expressed protein
227			LOC_Os09g08525	4450600	4451858	expressed protein
228			LOC_Os09g08540	4454469	4460072	retrotransposon protein, putative, unclassified, expressed
229			LOC_Os09g08550	4462316	4465028	OsFBX308 - F-box domain containing protein, expressed
230			LOC_Os09g08560	4466499	4466945	hypothetical protein
231			LOC_Os09g08570	4467902	4468804	expressed protein
232			LOC_Os09g08580	4474924	4476106	expressed protein
233			LOC_Os09g08590	4478192	4481656	transposon protein, putative, unclassified, expressed
234			LOC_Os09g08600	4482037	4482798	transposon protein, putative, CACTA, En/Spm sub-class
235			LOC_Os09g08610	4488402	4489259	expressed protein
236			LOC_Os09g08620	4502955	4506806	OsFBX309 - F-box domain containing protein, expressed
237			LOC_Os09g08630	4513274	4516617	retrotransposon protein, putative, unclassified, expressed
238			LOC_Os09g08640	4517251	4523405	retrotransposon protein, putative, unclassified, expressed
239			LOC_Os09g08650	4526474	4532793	retrotransposon protein, putative, Ty3-gypsy subclass, expressed
240			LOC_Os09g08660	4534955	4543655	4-nitrophenylphosphatase, putative, expressed
241			LOC_Os09g08670	4554651	4568812	protein of unknown function DUF1296 domain containing protein, expressed
242			LOC_Os09g08690	4569163	4569663	expressed protein
243			LOC_Os09g08700	4571504	4572628	expressed protein
244			LOC_Os09g08710	4577706	4580685	expressed protein
245			LOC_Os09g08710	4577706	4580686	expressed protein
246			LOC_Os09g08710	4577706	4580686	expressed protein
247			LOC_Os09g08720	4592170	4595244	cinnamoyl CoA reductase, putative, expressed
248			LOC_Os09g08730	4600910	4605598	pumilio domain-containing protein, putative, expressed
249			LOC_Os09g08740	4608974	4610200	retrotransposon protein, putative, Ty3-gypsy subclass, expressed
250			LOC_Os09g08750	4610549	4615447	retrotransposon protein, putative, Ty3-gypsy subclass, expressed
251			LOC_Os09g08760	4622469	4622852	hypothetical protein
252			LOC_Os09g08770	4625216	4628892	expressed protein
253			LOC_Os09g08780	4631420	4634749	transposon protein, putative, CACTA, En/Spm sub-class
254			LOC_Os09g08790	4636402	4639983	transposon protein, putative, CACTA, En/Spm sub-class, expressed
255			LOC_Os09g08810	4646765	4647219	retrotransposon protein, putative, unclassified
256			LOC_Os09g08820	4651098	4652737	transposon protein, putative, CACTA, En/Spm sub-class, expressed
257			LOC_Os09g08830	4654951	4658143	transposon protein, putative, CACTA, En/Spm sub-class, expressed
258			LOC_Os09g08840	4660972	4661424	expressed protein
259			LOC_Os09g08850	4668787	4670896	transposon protein, putative, CACTA, En/Spm sub-class, expressed
260			LOC_Os09g08860	4681329	4684252	retrotransposon protein, putative, Ty3-gypsy subclass, expressed
261			LOC_Os09g08870	4684578	4690688	retrotransposon protein, putative, Ty3-gypsy subclass, expressed
262			LOC_Os09g08880	4692153	4693007	ATP synthase like protein, putative, expressed
263			LOC_Os09g08890	4704612	4707752	mitochondrial 60S ribosomal protein L5, putative, expressed
264			LOC_Os09g08900	4715030	4720860	retrotransposon protein, putative, Ty3-gypsy subclass, expressed
265			LOC_Os09g08910	4725507	4730885	ATP synthase, putative, expressed
266			LOC_Os09g08920	4737231	4737840	cytochrome P450, putative, expressed
267			LOC_Os09g08930	4748016	4751384	transposon protein, putative, CACTA, En/Spm sub-class
268			LOC_Os09g08940	4753319	4756737	transposon protein, putative, CACTA, En/Spm sub-class
269			LOC_Os09g08950	4758429	4758926	expressed protein
270			LOC_Os09g08960	4762132	4765935	retrotransposon protein, putative, unclassified, expressed
271			LOC_Os09g08970	4771408	4771953	expressed protein
272			LOC_Os09g08980	4774980	4775378	retrotransposon protein, putative, unclassified
273			LOC_Os09g08990	4775513	4778505	cytochrome P450, putative, expressed
274			LOC_Os09g09000	4782011	4800217	transposon protein, putative, CACTA, En/Spm sub-class, expressed
275			LOC_Os09g09010	4802173	4802607	retrotransposon protein, putative, unclassified, expressed
276			LOC_Os09g09020	4804997	4807684	retrotransposon protein, putative, unclassified
277			LOC_Os09g09030	4809634	4810068	retrotransposon protein, putative, unclassified, expressed
278			LOC_Os09g09040	4813300	4813923	expressed protein
279			LOC_Os09g09050	4821024	4827967	retrotransposon protein, putative, Ty3-gypsy subclass, expressed
280			LOC_Os09g09060	4834514	4838691	transposon protein, putative, CACTA, En/Spm sub-class
281			LOC_Os09g09070	4847030	4848437	retrotransposon protein, putative, unclassified, expressed
282			LOC_Os09g09080	4853608	4856383	retrotransposon protein, putative, unclassified, expressed
283			LOC_Os09g09090	4859104	4862686	retrotransposon protein, putative, Ty3-gypsy subclass
284			LOC_Os09g09100	4864645	4868635	retrotransposon protein, putative, Ty3-gypsy subclass, expressed
285			LOC_Os09g09110	4870890	4872966	retrotransposon protein, putative, Ty3-gypsy subclass, expressed
286			LOC_Os09g09120	4877438	4880470	retrotransposon protein, putative, unclassified, expressed
287			LOC_Os09g09130	4882645	4888619	retrotransposon protein, putative, Ty3-gypsy subclass, expressed
288			LOC_Os09g09140	4889786	4891039	retrotransposon protein, putative, unclassified
289			LOC_Os09g09150	4894043	4896858	transposon protein, putative, CACTA, En/Spm sub-class, expressed
290			LOC_Os09g09160	4901033	4904323	transposon protein, putative, CACTA, En/Spm sub-class, expressed
291			LOC_Os09g09170	4910504	4910958	retrotransposon protein, putative, unclassified
292			LOC_Os09g09180	4914542	4915021	expressed protein
293			LOC_Os09g09190	4917482	4918183	retrotransposon protein, putative, unclassified
294			LOC_Os09g09200	4922538	4923698	retrotransposon protein, putative, unclassified
295			LOC_Os09g09210	4929366	4932323	expressed protein
296			LOC_Os09g09220	4933507	4942200	protein kinase domain containing protein, expressed
297			LOC_Os09g09230	4943208	4943863	cinnamoyl CoA reductase, putative, expressed
298			LOC_Os09g09240	4949220	4955135	retrotransposon protein, putative, Ty3-gypsy subclass, expressed
299			LOC_Os09g09250	4955357	4958281	retrotransposon protein, putative, Ty3-gypsy subclass, expressed
300			LOC_Os09g09260	4961788	4962434	expressed protein
301			LOC_Os09g09270	4962897	4963715	dihydroflavonol-4-reductase, putative
302			LOC_Os09g09290	4972691	4980074	retrotransposon protein, putative, unclassified, expressed
303			LOC_Os09g09290	4972698	4980074	retrotransposon protein, putative, unclassified, expressed
304			LOC_Os09g09310	4983025	4983288	retrotransposon protein, putative, unclassified, expressed
305			LOC_Os09g09320	4988972	4990544	nuclear transport factor, putative, expressed
306			LOC_Os09g09320	4988974	4991687	nuclear transport factor, putative, expressed
307			LOC_Os09g09330	4992062	4997389	expressed protein
308			LOC_Os09g09330	4992062	4997394	expressed protein
309			LOC_Os09g09350	5005955	5006589	expressed protein
310			LOC_Os09g09360	5006931	5020013	esterase/lipase/thioesterase, putative, expressed
311			LOC_Os09g09370	5021748	5029574	BTBN18 - Bric-a-Brac, Tramtrack, Broad Complex BTB domain with non-phototropic hypocotyl 3 NPH3 domain, expressed
312			LOC_Os09g09370	5021748	5029479	BTBN18 - Bric-a-Brac, Tramtrack, Broad Complex BTB domain with non-phototropic hypocotyl 3 NPH3 domain, expressed
313			LOC_Os09g09370	5021748	5029470	BTBN18 - Bric-a-Brac, Tramtrack, Broad Complex BTB domain with non-phototropic hypocotyl 3 NPH3 domain, expressed
314			LOC_Os09g09380	5033798	5034265	expressed protein
315			LOC_Os09g09390	5041642	5042948	transposon protein, putative, CACTA, En/Spm sub-class
316			LOC_Os09g09400	5047339	5051853	retrotransposon protein, putative, Ty3-gypsy subclass, expressed
317			LOC_Os09g09410	5052240	5052806	retrotransposon protein, putative, Ty3-gypsy subclass
318			LOC_Os09g09420	5057137	5065493	transposon protein, putative, CACTA, En/Spm sub-class, expressed
319			LOC_Os09g09430	5074754	5076376	retrotransposon protein, putative, unclassified
320			LOC_Os09g09450	5087530	5087994	PPR repeat domain containing protein, putative, expressed
321			LOC_Os09g09460	5089760	5091228	harpin-induced protein 1 domain containing protein, expressed
322			LOC_Os09g09470	5094691	5102635	WD domain, G-beta repeat domain containing protein, expressed
323			LOC_Os09g09470	5094691	5102650	WD domain, G-beta repeat domain containing protein, expressed
324			LOC_Os09g09480	5103023	5106862	SNF7 domain containing protein, putative, expressed
325			LOC_Os09g09480	5103023	5106862	SNF7 domain containing protein, putative, expressed
326			LOC_Os09g09480	5103142	5106862	SNF7 domain containing protein, putative, expressed
327			LOC_Os09g09490	5108210	5112958	disease resistance protein RPM1, putative, expressed
328			LOC_Os09g09500	5120567	5122573	lectin-like receptor kinase, putative, expressed
329			LOC_Os09g09510	5125150	5127327	legume lectins beta domain containing protein, expressed
330			LOC_Os09g09520	5137884	5142453	transporter family protein, putative, expressed
331			LOC_Os09g09530	5143515	5145439	expressed protein
332			LOC_Os09g09540	5150258	5154230	transposon protein, putative, unclassified, expressed
333			LOC_Os09g09550	5156336	5158006	plant protein of unknown function domain containing protein, expressed
334			LOC_Os09g09560	5159460	5161957	expressed protein
335			LOC_Os09g09570	5163478	5164879	expressed protein
336			LOC_Os09g09580	5167148	5169064	retrotransposon protein, putative, Ty3-gypsy subclass, expressed
337			LOC_Os09g09590	5173915	5174313	retrotransposon protein, putative, unclassified, expressed
338			LOC_Os09g09600	5176165	5179300	expressed protein
339			LOC_Os09g09610	5182571	5183636	retrotransposon protein, putative, unclassified, expressed
340			LOC_Os09g09630	5187963	5190200	WRKY112, expressed
341			LOC_Os09g09640	5191398	5191983	transposon protein, putative, CACTA, En/Spm sub-class, expressed
342			LOC_Os09g09650	5197975	5201335	retrotransposon protein, putative, Ty3-gypsy subclass, expressed
343			LOC_Os09g09660	5202340	5205432	retrotransposon protein, putative, Ty3-gypsy subclass, expressed
344			LOC_Os09g09670	5214964	5215838	expressed protein
345			LOC_Os09g09680	5223688	5229798	retrotransposon protein, putative, Ty3-gypsy subclass, expressed
346			LOC_Os09g09690	5229996	5236346	retrotransposon protein, putative, Ty3-gypsy subclass, expressed
347			LOC_Os09g09700	5246793	5251014	retrotransposon protein, putative, Ty3-gypsy subclass, expressed
348			LOC_Os09g09710	5251641	5257235	retrotransposon protein, putative, Ty3-gypsy subclass, expressed
349			LOC_Os09g09720	5259870	5263138	retrotransposon protein, putative, unclassified
350			LOC_Os09g09730	5267881	5268918	retrotransposon protein, putative, unclassified, expressed
351			LOC_Os09g09740	5271628	5272226	hypothetical protein
352			LOC_Os09g09750	5276098	5278927	disease resistance protein RPM1, putative, expressed
353			LOC_Os09g09760	5281420	5288374	retrotransposon protein, putative, unclassified, expressed
354			LOC_Os09g09770	5290339	5296740	retrotransposon protein, putative, Ty3-gypsy subclass, expressed
355			LOC_Os09g09780	5299688	5302967	retrotransposon protein, putative, unclassified, expressed
356			LOC_Os09g09790	5306896	5309061	Fe-S metabolism associated domain containing protein, expressed
357			LOC_Os09g09800	5313449	5316317	retrotransposon protein, putative, unclassified, expressed
358			LOC_Os09g09810	5316711	5321269	retrotransposon protein, putative, Ty3-gypsy subclass, expressed
359			LOC_Os09g09820	5320875	5323838	retrotransposon protein, putative, unclassified, expressed
360			LOC_Os09g09830	5327470	5330178	heavy-metal-associated domain-containing protein, putative, expressed
361			LOC_Os09g09830	5327470	5330178	heavy-metal-associated domain-containing protein, putative, expressed
362			LOC_Os09g09850	5348275	5351915	heavy metal-associated domain containing protein
363			LOC_Os09g09860	5355577	5358536	retrotransposon protein, putative, Ty3-gypsy subclass, expressed
364			LOC_Os09g09870	5358853	5365177	retrotransposon protein, putative, Ty3-gypsy subclass, expressed
365			LOC_Os09g09880	5373522	5375477	transposon protein, putative, CACTA, En/Spm sub-class
366			LOC_Os09g09890	5376584	5377696	transposon protein, putative, CACTA, En/Spm sub-class, expressed
367			LOC_Os09g09900	5377937	5379678	expressed protein
368			LOC_Os09g09910	5385521	5389015	retrotransposon protein, putative, Ty1-copia subclass, expressed
369			LOC_Os09g09920	5391032	5392931	expressed protein
370			LOC_Os09g09930	5395173	5396935	heavy metal transport/detoxification protein, putative, expressed
371			LOC_Os09g09940	5400926	5401679	hypothetical protein
372			LOC_Os09g09944	5403280	5404107	expressed protein
373			LOC_Os09g09960	5420149	5424600	retrotransposon protein, putative, Ty3-gypsy subclass, expressed
374			LOC_Os09g09970	5426226	5428804	retrotransposon protein, putative, unclassified, expressed
375			LOC_Os09g09980	5430895	5433234	glucan endo-1,3-beta-glucosidase precursor, putative, expressed
376			LOC_Os09g09990	5435182	5442247	transposon protein, putative, unclassified, expressed
377			LOC_Os09g10000	5445591	5450231	expressed protein
378			LOC_Os09g10010	5454023	5455007	expressed protein
379			LOC_Os09g10020	5456318	5461131	transposon protein, putative, unclassified, expressed
380			LOC_Os09g10030	5463372	5469063	retrotransposon protein, putative, unclassified, expressed
381			LOC_Os09g10054	5471800	5491310	disease resistance protein RPS2, putative, expressed
382			LOC_Os09g10080	5492541	5495479	retrotransposon protein, putative, Ty3-gypsy subclass, expressed
383			LOC_Os09g10090	5498077	5499041	retrotransposon protein, putative, unclassified
384			LOC_Os09g10100	5503778	5505667	retrotransposon protein, putative, unclassified
385			LOC_Os09g10109	5507267	5508347	retrotransposon protein, putative, Ty3-gypsy subclass
386			LOC_Os09g10120	5508543	5511745	retrotransposon protein, putative, unclassified
387			LOC_Os09g10130	5514058	5515138	retrotransposon protein, putative, Ty3-gypsy subclass
388			LOC_Os09g10140	5515334	5518536	retrotransposon protein, putative, unclassified, expressed
389			LOC_Os09g10149	5520849	5521929	retrotransposon protein, putative, Ty3-gypsy subclass
390			LOC_Os09g10160	5522125	5525327	retrotransposon protein, putative, unclassified, expressed
391			LOC_Os09g10170	5527640	5533450	retrotransposon protein, putative, Ty3-gypsy subclass, expressed
392			LOC_Os09g10180	5539419	5539931	expressed protein
393			LOC_Os09g10190	5543051	5545026	transposon protein, putative, unclassified, expressed
394			LOC_Os09g10200	5554218	5555029	Skp1 family, dimerisation domain containing protein, expressed
395			LOC_Os09g10201	5555449	5556367	expressed protein
396			LOC_Os09g10204	5556531	5557872	expressed protein
397			LOC_Os09g10210	5559178	5559436	expressed protein
398			LOC_Os09g10220	5563389	5572172	transposon protein, putative, CACTA, En/Spm sub-class, expressed
399			LOC_Os09g10230	5574829	5575332	Skp1 family, dimerisation domain containing protein, expressed
400			LOC_Os09g10240	5576424	5583937	retrotransposon protein, putative, unclassified, expressed
401			LOC_Os09g10250	5585021	5585287	expressed protein
402			LOC_Os09g10260	5587916	5588413	Skp1 family, dimerisation domain containing protein, expressed
403			LOC_Os09g10270	5594786	5595304	SKP1-like protein 1B, putative, expressed
404			LOC_Os09g10274	5598644	5599857	expressed protein
405			LOC_Os09g10280	5601227	5602061	expressed protein
406			LOC_Os09g10290	5605607	5607833	retrotransposon protein, putative, Ty1-copia subclass, expressed
407			LOC_Os09g10300	5610377	5611035	Skp1 family, dimerisation domain containing protein, expressed
408			LOC_Os09g10310	5620905	5621529	retrotransposon protein, putative, Ty3-gypsy subclass
409			LOC_Os09g10320	5624093	5624416	transposon protein, putative, unclassified, expressed
410			LOC_Os09g10330	5625475	5626305	expressed protein
411			LOC_Os09g10340	5643294	5645523	cytochrome P450, putative, expressed
412			LOC_Os09g10350	5655552	5657370	transposon protein, putative, unclassified, expressed
413			LOC_Os09g10360	5657883	5661134	expressed protein
414			LOC_Os09g10370	5678215	5679699	hypothetical protein
415			LOC_Os09g10380	5681007	5681749	transposon protein, putative, unclassified, expressed
416			LOC_Os09g10390	5684077	5686877	retrotransposon protein, putative, unclassified, expressed
417			LOC_Os09g10400	5687319	5688023	transposon protein, putative, unclassified, expressed
418			LOC_Os09g10410	5690795	5692618	retrotransposon protein, putative, unclassified, expressed
419			LOC_Os09g10420	5696108	5697468	retrotransposon protein, putative, unclassified, expressed
420			LOC_Os09g10430	5697737	5699278	retrotransposon protein, putative, unclassified, expressed
421			LOC_Os09g10440	5706013	5707173	retrotransposon protein, putative, Ty3-gypsy subclass
422			LOC_Os09g10450	5709713	5712556	retrotransposon protein, putative, Ty3-gypsy subclass, expressed
423			LOC_Os09g10460	5716356	5717923	transposon protein, putative, unclassified
424			LOC_Os09g10470	5720176	5724690	retrotransposon protein, putative, Ty3-gypsy subclass, expressed
425			LOC_Os09g10480	5724945	5726845	retrotransposon protein, putative, Ty3-gypsy subclass
426			LOC_Os09g10500	5731990	5732583	retrotransposon protein, putative, Ty3-gypsy subclass
427			LOC_Os09g10510	5732932	5734125	retrotransposon protein, putative, Ty3-gypsy subclass, expressed
428			LOC_Os09g10520	5734833	5735254	hypothetical protein
429			LOC_Os09g10530	5743398	5744614	retrotransposon protein, putative, unclassified, expressed
430			LOC_Os09g10540	5748548	5754807	retrotransposon protein, putative, Ty3-gypsy subclass, expressed
431			LOC_Os09g10550	5759676	5761466	expressed protein
432			LOC_Os09g10560	5764742	5765152	expressed protein
433			LOC_Os09g10570	5765327	5770170	expressed protein
434			LOC_Os09g10580	5771360	5772539	expressed protein
435			LOC_Os09g10600	5781818	5786018	enoyl-acyl-carrier-protein reductase NADH, chloroplast precursor, expressed
436			LOC_Os09g10610	5786893	5788455	expressed protein
437			LOC_Os09g10620	5789801	5790358	seed maturation protein LEA 4, putative, expressed
438			LOC_Os09g10630	5793544	5793972	expressed protein
439			LOC_Os09g10640	5796957	5797607	retrotransposon protein, putative, unclassified, expressed
440			LOC_Os09g10650	5800256	5806941	phosphatidylinositol-4-phosphate 5-Kinase family protein, putative, expressed
441			LOC_Os09g10660	5817870	5819446	expressed protein
442			LOC_Os09g10670	5820495	5820982	hypothetical protein
443			LOC_Os09g10680	5822784	5824771	hypothetical protein
444			LOC_Os09g10690	5826195	5827229	expressed protein
445			LOC_Os09g10700	5829396	5831641	hypothetical protein
446			LOC_Os09g10710	5836661	5843910	R-interacting factor 1, putative, expressed
447			LOC_Os09g10710	5836661	5843899	R-interacting factor 1, putative, expressed
448			LOC_Os09g10710	5836661	5843910	R-interacting factor 1, putative, expressed
449			LOC_Os09g10720	5847603	5851899	AP2-associated protein kinase 1, putative, expressed
450			LOC_Os09g10730	5856194	5857151	expressed protein
451			LOC_Os09g10740	5863941	5865175	mitochondrial import inner membrane translocase subunit Tim17, putative, expressed
452			LOC_Os09g10750	5866442	5870676	rhodanese-like, putative, expressed
453			LOC_Os09g10760	5870961	5873202	RNA recognition motif containing protein, putative, expressed
454			LOC_Os09g10770	5874972	5883020	OsTOP6B - Topoisomerase 6 subunit B, expressed
455			LOC_Os09g10780	5883560	5884196	expressed protein
456			LOC_Os09g10790	5888125	5890572	retrotransposon protein, putative, unclassified, expressed
457			LOC_Os09g10800	5896338	5897113	expressed protein
458			LOC_Os09g10810	5898999	5900010	retrotransposon, putative, centromere-specific
459			LOC_Os09g10820	5900633	5905440	oxidoreductase domain protein, putative, expressed
460			LOC_Os09g10830	5906970	5907501	hypothetical protein
461			LOC_Os09g10840	5918077	5929775	transcription factor, putative, expressed
462			LOC_Os09g10840	5918077	5929775	transcription factor, putative, expressed
463			LOC_Os09g10850	5935331	5940418	meiotic coiled-coil protein 7, putative, expressed
464			LOC_Os09g10860	5943545	5943847	expressed protein
465			LOC_Os09g10865	5950962	5951439	expressed protein
466			LOC_Os09g10870	5954108	5958902	retrotransposon protein, putative, unclassified, expressed
467			LOC_Os09g10880	5961154	5966211	expressed protein
468			LOC_Os09g10890	5971976	5977219	retrotransposon protein, putative, unclassified, expressed
469			LOC_Os09g10900	5986513	5989914	retrotransposon protein, putative, unclassified, expressed
470			LOC_Os09g10910	5991120	5996533	fiber protein Fb34, putative, expressed
471			LOC_Os09g10910	5991120	5996533	fiber protein Fb34, putative, expressed
472			LOC_Os09g10910	5991120	5996533	fiber protein Fb34, putative, expressed
473			LOC_Os09g10920	6001875	6006452	retrotransposon protein, putative, Ty3-gypsy subclass
474			LOC_Os09g10930	6016388	6020410	gamma response I protein, putative, expressed
475			LOC_Os09g10930	6016446	6020410	gamma response I protein, putative, expressed
476			LOC_Os09g10940	6021898	6025706	ras-related protein, putative, expressed
477			LOC_Os09g10950	6031213	6035259	expressed protein
478			LOC_Os09g10960	6037880	6049276	SWP, putative, expressed
479			LOC_Os09g10970	6059397	6059716	expressed protein
480			LOC_Os09g10980	6061400	6066866	ZOS9-02 - C2H2 zinc finger protein, expressed
481			LOC_Os09g10990	6071436	6071951	transposon protein, putative, CACTA, En/Spm sub-class, expressed
482			LOC_Os09g11000	6084183	6084690	expressed protein
483			LOC_Os09g11005	6093906	6095176	expressed protein
484			LOC_Os09g11010	6100888	6104613	retrotransposon protein, putative, unclassified, expressed
485			LOC_Os09g11020	6117013	6123691	NBS-LRR disease resistance protein, putative, expressed
486			LOC_Os09g11030	6125907	6128820	retrotransposon protein, putative, unclassified, expressed
487			LOC_Os09g11040	6129147	6135259	retrotransposon protein, putative, Ty3-gypsy subclass, expressed
488			LOC_Os09g11050	6138083	6138478	expressed protein
489			LOC_Os09g11060	6139209	6142906	transposon protein, putative, CACTA, En/Spm sub-class, expressed
490			LOC_Os09g11070	6145539	6148870	transposon protein, putative, CACTA, En/Spm sub-class, expressed
491			LOC_Os09g11080	6149900	6150765	retrotransposon protein, putative, Ty3-gypsy subclass
492			LOC_Os09g11090	6152732	6153127	expressed protein
493			LOC_Os09g11100	6154314	6160137	retrotransposon protein, putative, Ty3-gypsy subclass, expressed
494			LOC_Os09g11110	6160766	6163707	retrotransposon protein, putative, unclassified, expressed
495			LOC_Os09g11120	6165470	6166262	expressed protein
496			LOC_Os09g11130	6167523	6168856	hypothetical protein
497			LOC_Os09g11140	6171119	6174633	expressed protein
498			LOC_Os09g11150	6176333	6179600	retrotransposon, putative, centromere-specific, expressed
499			LOC_Os09g11160	6184849	6186368	expressed protein
500			LOC_Os09g11170	6195158	6196917	protein binding protein, putative, expressed
501			LOC_Os09g11180	6197403	6197831	expressed protein
502			LOC_Os09g11190	6205643	6207169	hypothetical protein
503			LOC_Os09g11200	6208946	6209227	THION33 - Plant thionin family protein precursor, putative
504			LOC_Os09g11210	6212043	6212517	THION35 - Plant thionin family protein precursor, putative, expressed
505			LOC_Os09g11220	6218761	6225987	retrotransposon protein, putative, unclassified, expressed
506			LOC_Os09g11230	6233843	6238922	Ser/Thr protein phosphatase family protein, putative, expressed
507			LOC_Os09g11240	6243180	6245977	expressed protein
508			LOC_Os09g11250	6246237	6249750	co-chaperone GrpE protein, putative, expressed
509			LOC_Os09g11260	6250839	6251492	hypothetical protein
510			LOC_Os09g11270	6251862	6260858	enhancer of polycomb, putative, expressed
511			LOC_Os09g11280	6262724	6263591	hypothetical protein
512			LOC_Os09g11290	6266198	6266539	indole-3-acetate beta-glucosyltransferase, putative
513			LOC_Os09g11300	6271930	6274949	hypothetical protein
514			LOC_Os09g11310	6276651	6277322	hypothetical protein
515			LOC_Os09g11320	6285004	6289486	expressed protein
516			LOC_Os09g11330	6294425	6295952	hypothetical protein
517			LOC_Os09g11350	6300921	6302195	retrotransposon protein, putative, unclassified
518			LOC_Os09g11360	6305608	6311133	retrotransposon protein, putative, Ty3-gypsy subclass, expressed
519			LOC_Os09g11370	6323254	6323796	expressed protein
520			LOC_Os09g11380	6327584	6336208	expressed protein
521			LOC_Os09g11390	6336608	6342840	transposon protein, putative, unclassified, expressed
522			LOC_Os09g11400	6349892	6352986	transposon protein, putative, CACTA, En/Spm sub-class, expressed
523			LOC_Os09g11410	6354479	6356849	transposon protein, putative, CACTA, En/Spm sub-class
524			LOC_Os09g11420	6357345	6359445	transposon protein, putative, CACTA, En/Spm sub-class, expressed
525			LOC_Os09g11440	6368332	6371361	expressed protein
526			LOC_Os09g11440	6368337	6371361	expressed protein
527			LOC_Os09g11450	6373268	6383438	transporter, monovalent cation:proton antiporter-2 family, putative, expressed
528			LOC_Os09g11450	6374239	6383644	transporter, monovalent cation:proton antiporter-2 family, putative, expressed
529			LOC_Os09g11460	6387891	6389789	AP2 domain containing protein, expressed
530			LOC_Os09g11460	6387894	6389789	AP2 domain containing protein, expressed
531			LOC_Os09g11470	6392799	6393097	expressed protein
532			LOC_Os09g11480	6404474	6406039	AP2 domain containing protein, expressed
533			LOC_Os09g11480	6404474	6406039	AP2 domain containing protein, expressed
534			LOC_Os09g11490	6410064	6413354	retrotransposon protein, putative, unclassified, expressed
535			LOC_Os09g11500	6413996	6423117	retrotransposon protein, putative, unclassified, expressed
536			LOC_Os09g11510	6434549	6438925	phosphoglycerate mutase, putative, expressed
537			LOC_Os09g11520	6439622	6441905	DUF565 domain containing protein, putative, expressed
538			LOC_Os09g11530	6442329	6443669	expressed protein
539			LOC_Os09g11540	6444860	6445300	expressed protein
540			LOC_Os09g11550	6446051	6449988	retrotransposon protein, putative, Ty1-copia subclass, expressed
541			LOC_Os09g11560	6452598	6455394	expressed protein
542			LOC_Os09g11570	6456801	6458442	retrotransposon protein, putative, unclassified
543			LOC_Os09g11580	6459349	6468810	retrotransposon protein, putative, Ty3-gypsy subclass, expressed
544			LOC_Os09g11590	6470198	6470539	hypothetical protein
545			LOC_Os09g11600	6476250	6478992	retrotransposon protein, putative, unclassified, expressed
546			LOC_Os09g11610	6479408	6484267	retrotransposon protein, putative, Ty3-gypsy subclass, expressed
547			LOC_Os09g11620	6488693	6489262	retrotransposon protein, putative, Ty3-gypsy subclass
548			LOC_Os09g11630	6490598	6496754	retrotransposon protein, putative, unclassified, expressed
549			LOC_Os09g11640	6497373	6500662	retrotransposon protein, putative, unclassified, expressed
550			LOC_Os09g11650	6502444	6502707	retrotransposon protein, putative, Ty3-gypsy subclass, expressed
551			LOC_Os09g11660	6503215	6507182	expressed protein
552			LOC_Os09g11670	6510145	6510600	expressed protein
553			LOC_Os09g11680	6515815	6520248	retrotransposon protein, putative, unclassified, expressed
554			LOC_Os09g11690	6524013	6525570	transposon protein, putative, CACTA, En/Spm sub-class, expressed
555			LOC_Os09g11700	6526469	6527024	expressed protein
556			LOC_Os09g11710	6533175	6534062	retrotransposon protein, putative, unclassified
557			LOC_Os09g11720	6538316	6541870	expressed protein
558			LOC_Os09g11730	6542918	6549115	expressed protein
559			LOC_Os09g11740	6556858	6562509	retrotransposon protein, putative, Ty1-copia subclass
560			LOC_Os09g11750	6568790	6571126	transposon protein, putative, CACTA, En/Spm sub-class
561			LOC_Os09g11760	6573385	6576173	expressed protein
562			LOC_Os09g11770	6580470	6580769	hypothetical protein
563			LOC_Os09g11780	6591145	6591381	hypothetical protein
564			LOC_Os09g11790	6594470	6594871	DEFL14 - Defensin and Defensin-like DEFL family, expressed
565			LOC_Os09g11800	6596786	6598134	expressed protein
566			LOC_Os09g11810	6609276	6610132	expressed protein
567			LOC_Os09g11820	6611010	6616959	transposon protein, putative, unclassified, expressed
568			LOC_Os09g11830	6631460	6633006	expressed protein
569			LOC_Os09g11840	6639203	6641170	expressed protein
570			LOC_Os09g11850	6643023	6646354	ulp1 protease family, C-terminal catalytic domain containing protein, expressed
571			LOC_Os09g11860	6647460	6649197	ulp1 protease family, C-terminal catalytic domain containing protein, expressed
572			LOC_Os09g11870	6651255	6656572	transposon protein, putative, unclassified, expressed
573			LOC_Os09g11880	6665743	6666826	retrotransposon protein, putative, unclassified, expressed
574			LOC_Os09g11890	6673037	6678975	expressed protein
575			LOC_Os09g11900	6687845	6691306	expressed protein
576			LOC_Os09g11910	6694217	6698761	transposon protein, putative, CACTA, En/Spm sub-class, expressed
577			LOC_Os09g11920	6703072	6705049	transposon protein, putative, unclassified, expressed
578			LOC_Os09g11930	6709215	6710112	expressed protein
579			LOC_Os09g11940	6721117	6726646	retrotransposon protein, putative, Ty3-gypsy subclass, expressed
580			LOC_Os09g11950	6727667	6730490	retrotransposon protein, putative, unclassified, expressed
581			LOC_Os09g11960	6740823	6741854	retrotransposon protein, putative, unclassified, expressed
582			LOC_Os09g11970	6745873	6746376	keratin, type II cytoskeletal 2 epidermal, putative, expressed
583			LOC_Os09g11980	6751460	6754563	retrotransposon protein, putative, Ty1-copia subclass
584			LOC_Os09g11990	6756705	6757136	pc-fam-2 protein, putative, expressed
585			LOC_Os09g12000	6759298	6760348	hypothetical protein
586			LOC_Os09g12010	6761762	6763437	retrotransposon protein, putative, unclassified, expressed
587			LOC_Os09g12020	6770735	6772366	retrotransposon protein, putative, unclassified, expressed
588			LOC_Os09g12050	6803261	6806757	retrotransposon protein, putative, unclassified, expressed
589			LOC_Os09g12060	6807908	6810609	expressed protein
590			LOC_Os09g12070	6814647	6816509	retrotransposon protein, putative, unclassified, expressed
591			LOC_Os09g12080	6818035	6820807	retrotransposon protein, putative, unclassified, expressed
592			LOC_Os09g12090	6827191	6831166	retrotransposon protein, putative, Ty1-copia subclass, expressed
593			LOC_Os09g12100	6835261	6838068	transposon protein, putative, CACTA, En/Spm sub-class
594			LOC_Os09g12110	6838171	6844204	transposon protein, putative, CACTA, En/Spm sub-class, expressed
595			LOC_Os09g12130	6854205	6860359	retrotransposon protein, putative, unclassified, expressed
596			LOC_Os09g12140	6860983	6864123	retrotransposon protein, putative, unclassified, expressed
597			LOC_Os09g12150	6873236	6874621	OsFBX310 - F-box domain containing protein, expressed
598			LOC_Os09g12160	6882103	6882888	transposon protein, putative, CACTA, En/Spm sub-class
599			LOC_Os09g12170	6883145	6884931	transposon protein, putative, CACTA, En/Spm sub-class, expressed
600			LOC_Os09g12180	6885052	6887245	transposon protein, putative, CACTA, En/Spm sub-class, expressed
601			LOC_Os09g12190	6888612	6891991	transposon protein, putative, CACTA, En/Spm sub-class, expressed
602			LOC_Os09g12200	6897777	6898156	expressed protein
603			LOC_Os09g12210	6918070	6918850	hypothetical protein
604			LOC_Os09g12220	6928625	6929805	retrotransposon protein, putative, unclassified, expressed
605			LOC_Os09g12230	6947839	6951237	ubiquitin-conjugating enzyme, putative, expressed
606			LOC_Os09g12240	6954941	6959667	serine/threonine-protein kinase BRI1-like 1 precursor, putative, expressed
607			LOC_Os09g12250	6975494	6978083	expressed protein
608			LOC_Os09g12260	6988163	6988744	expressed protein
609			LOC_Os09g12270	6990893	6994473	peptidyl-prolyl cis-trans isomerase, FKBP-type, putative, expressed
610			LOC_Os09g12290	6995049	7009516	bifunctional aspartokinase/homoserine dehydrogenase, chloroplast precursor, putative, expressed
611			LOC_Os09g12300	7015998	7016707	serine/threonine-protein kinase NAK, putative, expressed
612			LOC_Os09g12310	7017623	7020985	ubiquitin-conjugating enzyme domain containing protein, expressed
613			LOC_Os09g12320	7023340	7026162	retrotransposon protein, putative, unclassified, expressed
614			LOC_Os09g12330	7026975	7031101	retrotransposon protein, putative, Ty3-gypsy subclass, expressed
615			LOC_Os09g12340	7034461	7035795	retrotransposon protein, putative, unclassified, expressed
616			LOC_Os09g12350	7045390	7054384	expressed protein
617			LOC_Os09g12360	7065368	7066024	retrotransposon protein, putative, unclassified, expressed
618			LOC_Os09g12370	7069308	7071423	transposon protein, putative, CACTA, En/Spm sub-class
619			LOC_Os09g12380	7077212	7078851	no apical meristem protein, putative, expressed
620			LOC_Os09g12390	7087048	7087810	expressed protein
621			LOC_Os09g12400	7094058	7094822	expressed protein
622			LOC_Os09g12410	7095651	7097308	hAT dimerisation domain-containing protein, putative, expressed
623			LOC_Os09g12420	7105780	7115076	transposon protein, putative, unclassified, expressed
624			LOC_Os09g12430	7116134	7117458	hypothetical protein
625			LOC_Os09g12440	7119890	7120611	retrotransposon protein, putative, unclassified, expressed
626			LOC_Os09g12450	7123716	7124150	retrotransposon protein, putative, unclassified, expressed
627			LOC_Os09g12460	7127341	7128357	retrotransposon, putative, centromere-specific, expressed
628			LOC_Os09g12470	7129773	7130316	hypothetical protein
629			LOC_Os09g12480	7133650	7145978	ulp1 protease family, C-terminal catalytic domain containing protein, expressed
630			LOC_Os09g12490	7151324	7155338	retrotransposon protein, putative, unclassified
631			LOC_Os09g12500	7166573	7171386	EMB1381, putative, expressed
632			LOC_Os09g12500	7166573	7171386	EMB1381, putative, expressed
633			LOC_Os09g12510	7172518	7173593	expressed protein
634			LOC_Os09g12520	7176508	7177211	hypothetical protein
635			LOC_Os09g12530	7179963	7181868	glycosyl transferase, group 1 domain containing protein, expressed
636			LOC_Os09g12540	7185218	7188146	chlorophyll A-B binding protein, putative, expressed
637			LOC_Os09g12550	7189540	7196751	WD domain, G-beta repeat domain containing protein, expressed
638			LOC_Os09g12560	7198633	7204750	ferrochelatase-2, chloroplast precursor, putative, expressed
639			LOC_Os09g12560	7198849	7204750	ferrochelatase-2, chloroplast precursor, putative, expressed
640			LOC_Os09g12570	7205126	7208212	ubiquitin-conjugating enzyme, putative, expressed
641			LOC_Os09g12580	7216986	7217375	expressed protein
642			LOC_Os09g12590	7218962	7220515	transporter family protein, putative, expressed
643			LOC_Os09g12600	7222175	7225657	phosphate/phosphate translocator, putative, expressed
644			LOC_Os09g12600	7222188	7225657	phosphate/phosphate translocator, putative, expressed
645			LOC_Os09g12610	7226823	7227459	expressed protein
646			LOC_Os09g12615	7228476	7229197	expressed protein
647			LOC_Os09g12620	7231650	7232571	GPI-anchored protein, putative, expressed
648			LOC_Os09g12630	7233344	7234198	expressed protein
649			LOC_Os09g12640	7235109	7235508	expressed protein
650			LOC_Os09g12650	7240238	7245003	pyrophosphate--fructose 6-phosphate 1-phosphotransferase subunit alpha, putative, expressed
651			LOC_Os09g12660	7245359	7249816	glucose-1-phosphate adenylyltransferase large subunit, chloroplast precursor, putative, expressed
652			LOC_Os09g12660	7245406	7249816	glucose-1-phosphate adenylyltransferase large subunit, chloroplast precursor, putative, expressed
653			LOC_Os09g12670	7251983	7252387	transposon protein, putative, unclassified
654			LOC_Os09g12680	7257831	7258067	expressed protein
655			LOC_Os09g12690	7265424	7267380	retrotransposon protein, putative, Ty3-gypsy subclass, expressed
656			LOC_Os09g12700	7267567	7270153	retrotransposon protein, putative, Ty3-gypsy subclass
657			LOC_Os09g12710	7271228	7276920	WD domain, G-beta repeat domain containing protein, expressed
658			LOC_Os09g12720	7277192	7282393	zinc finger, C3HC4 type domain containing protein, expressed
659			LOC_Os09g12720	7277192	7281256	zinc finger, C3HC4 type domain containing protein, expressed
660			LOC_Os09g12730	7293011	7300555	RNA recognition motif containing protein, expressed
661			LOC_Os09g12730	7293011	7300542	RNA recognition motif containing protein, expressed
662			LOC_Os09g12740	7306638	7307849	retrotransposon protein, putative, Ty3-gypsy subclass
663			LOC_Os09g12750	7316075	7322324	Myb-like DNA-binding domain containing protein, putative, expressed
664			LOC_Os09g12750	7316075	7322324	Myb-like DNA-binding domain containing protein, putative, expressed
665			LOC_Os09g12770	7329540	7333290	Myb-like DNA-binding domain containing protein, putative, expressed
666			LOC_Os09g12770	7329540	7333290	Myb-like DNA-binding domain containing protein, putative, expressed
667			LOC_Os09g12780	7334171	7335241	expressed protein
668			LOC_Os09g12790	7336374	7340496	potassium channel protein, putative, expressed
669			LOC_Os09g12800	7347438	7354032	zinc finger Ran-binding domain-containing protein 2, putative, expressed
670			LOC_Os09g12810	7366959	7369733	transposon protein, putative, CACTA, En/Spm sub-class, expressed
671			LOC_Os09g12820	7370444	7371941	retrotransposon protein, putative, Ty3-gypsy subclass, expressed
672			LOC_Os09g12830	7374109	7377673	transposon protein, putative, CACTA, En/Spm sub-class
673			LOC_Os09g12840	7378520	7380640	plant protein of unknown function domain containing protein, expressed
674			LOC_Os09g12850	7396146	7396683	hypothetical protein
675			LOC_Os09g12860	7399112	7401721	expressed protein
676			LOC_Os09g12870	7402087	7405753	transposon protein, putative, CACTA, En/Spm sub-class, expressed
677			LOC_Os09g12890	7419056	7424674	retrotransposon protein, putative, Ty3-gypsy subclass, expressed
678			LOC_Os09g12900	7429162	7429774	expressed protein
679			LOC_Os09g12910	7438727	7439686	expressed protein
680			LOC_Os09g12920	7444495	7444965	expressed protein
681			LOC_Os09g12930	7451933	7456160	retrotransposon protein, putative, Ty1-copia subclass, expressed
682			LOC_Os09g12940	7458405	7465079	retrotransposon protein, putative, Ty3-gypsy subclass, expressed
683			LOC_Os09g12950	7467242	7469075	retrotransposon protein, putative, Ty1-copia subclass
684			LOC_Os09g12970	7470846	7483169	plant protein of unknown function domain containing protein, expressed
685			LOC_Os09g12980	7484551	7486529	retrotransposon protein, putative, LINE subclass
686			LOC_Os09g12990	7494637	7495432	expressed protein
687			LOC_Os09g13000	7507155	7510207	expressed protein
688			LOC_Os09g13010	7510531	7511835	hypothetical protein
689			LOC_Os09g13020	7512402	7512710	expressed protein
690			LOC_Os09g13030	7512888	7515754	transposon protein, putative, CACTA, En/Spm sub-class, expressed
691			LOC_Os09g13040	7519040	7523188	plant protein of unknown function domain containing protein, expressed
692			LOC_Os09g13050	7525310	7525849	expressed protein
693			LOC_Os09g13060	7528906	7531974	retrotransposon protein, putative, Ty3-gypsy subclass, expressed
694			LOC_Os09g13070	7532372	7534451	retrotransposon protein, putative, Ty3-gypsy subclass, expressed
695			LOC_Os09g13080	7536822	7538000	expressed protein
696			LOC_Os09g13090	7540663	7542396	retrotransposon protein, putative, Ty3-gypsy subclass
697			LOC_Os09g13100	7542880	7546546	retrotransposon protein, putative, Ty3-gypsy subclass, expressed
698			LOC_Os09g13110	7548366	7561707	retrotransposon protein, putative, unclassified, expressed
699			LOC_Os09g13120	7565155	7565837	retrotransposon protein, putative, unclassified, expressed
700			LOC_Os09g13130	7568702	7570427	retrotransposon protein, putative, unclassified
701			LOC_Os09g13140	7571498	7574210	retrotransposon protein, putative, unclassified
702			LOC_Os09g13150	7577006	7581623	retrotransposon protein, putative, unclassified, expressed
703			LOC_Os09g13160	7582402	7584640	retrotransposon protein, putative, unclassified, expressed
704			LOC_Os09g13170	7585220	7587686	retrotransposon protein, putative, unclassified
705			LOC_Os09g13180	7589615	7593973	retrotransposon protein, putative, Ty3-gypsy subclass, expressed
706			LOC_Os09g13190	7597316	7599296	retrotransposon protein, putative, Ty3-gypsy subclass, expressed
707			LOC_Os09g13200	7608188	7610056	retrotransposon protein, putative, Ty3-gypsy subclass, expressed
708			LOC_Os09g13210	7610321	7614742	retrotransposon protein, putative, Ty3-gypsy subclass, expressed
709			LOC_Os09g13220	7615446	7615865	retrotransposon protein, putative, Ty3-gypsy subclass
710			LOC_Os09g13230	7621709	7629582	retrotransposon protein, putative, Ty3-gypsy subclass, expressed
711			LOC_Os09g13240	7636500	7637967	hypothetical protein
712			LOC_Os09g13250	7644314	7644945	expressed protein
713			LOC_Os09g13260	7651310	7652897	expressed protein
714			LOC_Os09g13280	7658654	7659334	transposon protein, putative, CACTA, En/Spm sub-class
715			LOC_Os09g13290	7662992	7663828	expressed protein
716			LOC_Os09g13300	7670703	7673379	hypothetical protein
717			LOC_Os09g13310	7675863	7677077	retrotransposon protein, putative, Ty3-gypsy subclass, expressed
718			LOC_Os09g13320	7679984	7681875	transposon protein, putative, CACTA, En/Spm sub-class, expressed
719			LOC_Os09g13330	7686328	7691305	transposon protein, putative, CACTA, En/Spm sub-class, expressed
720			LOC_Os09g13340	7693090	7696244	transposon protein, putative, CACTA, En/Spm sub-class
721			LOC_Os09g13350	7706313	7709603	transposon protein, putative, CACTA, En/Spm sub-class, expressed
722			LOC_Os09g13360	7711293	7713467	transposon protein, putative, CACTA, En/Spm sub-class, expressed
723			LOC_Os09g13370	7713929	7716136	transposon protein, putative, CACTA, En/Spm sub-class
724			LOC_Os09g13380	7717496	7720777	retrotransposon protein, putative, Ty1-copia subclass, expressed
725			LOC_Os09g13390	7727035	7727335	expressed protein
726			LOC_Os09g13400	7741162	7743971	expressed protein
727			LOC_Os09g13410	7753372	7755498	plant protein of unknown function domain containing protein, expressed
728			LOC_Os09g13420	7759918	7762038	mucin, putative
729			LOC_Os09g13430	7770806	7773168	retrotransposon protein, putative, Ty3-gypsy subclass
730			LOC_Os09g13440	7773027	7777015	expressed protein
731			LOC_Os09g13440	7775698	7777015	expressed protein
732			LOC_Os09g13450	7779360	7779914	expressed protein
733			LOC_Os09g13460	7781270	7782314	expressed protein
734			LOC_Os09g13470	7797868	7800142	plant protein of unknown function domain containing protein, expressed
735			LOC_Os09g13480	7804064	7807239	transposon protein, putative, CACTA, En/Spm sub-class, expressed
736			LOC_Os09g13490	7808303	7808764	transposon protein, putative, CACTA, En/Spm sub-class
737			LOC_Os09g13500	7810086	7813418	transposon protein, putative, CACTA, En/Spm sub-class, expressed
738			LOC_Os09g13510	7819822	7824483	retrotransposon protein, putative, unclassified, expressed
739			LOC_Os09g13520	7838204	7838970	hypothetical protein
740			LOC_Os09g13530	7843134	7844185	zinc finger C-x8-C-x5-C-x3-H type family protein, expressed
741			LOC_Os09g13540	7848313	7853098	retrotransposon protein, putative, unclassified, expressed
742			LOC_Os09g13550	7856323	7859655	transposon protein, putative, CACTA, En/Spm sub-class, expressed
743			LOC_Os09g13560	7862770	7866467	transposon protein, putative, CACTA, En/Spm sub-class, expressed
744			LOC_Os09g13570	7871403	7873655	CPuORF2 - conserved peptide uORF-containing transcript, expressed
745			LOC_Os09g13575	7872377	7873255	expressed protein
746			LOC_Os09g13590	7888126	7889225	expressed protein
747			LOC_Os09g13600	7901645	7904132	expressed protein
748			LOC_Os09g13600	7902487	7904132	expressed protein
749			LOC_Os09g13610	7914083	7925405	PFT1, putative, expressed
750			LOC_Os09g13610	7914276	7923657	PFT1, putative, expressed
751			LOC_Os09g13630	7925560	7938161	ZOS9-03 - C2H2 zinc finger protein, expressed
752			LOC_Os09g13640	7952823	7953923	retrotransposon protein, putative, unclassified
753			LOC_Os09g13650	7964046	7967919	microtubule-associated protein, putative, expressed
754			LOC_Os09g13650	7964046	7967919	microtubule-associated protein, putative, expressed
755			LOC_Os09g13650	7964046	7967919	microtubule-associated protein, putative, expressed
756			LOC_Os09g13660	7981380	7985076	transposon protein, putative, CACTA, En/Spm sub-class, expressed
757			LOC_Os09g13670	7987786	7991118	transposon protein, putative, CACTA, En/Spm sub-class, expressed
758			LOC_Os09g13680	7995738	7996963	ZOS9-04 - C2H2 zinc finger protein, expressed
759			LOC_Os09g13690	8005605	8008896	retrotransposon protein, putative, unclassified, expressed
760			LOC_Os09g13700	8009496	8015633	retrotransposon protein, putative, unclassified, expressed
761			LOC_Os09g13710	8019824	8025382	retrotransposon protein, putative, Ty3-gypsy subclass, expressed
762			LOC_Os09g13720	8026832	8030268	expressed protein
763			LOC_Os09g13740	8039176	8046950	SET domain containing protein, expressed
764			LOC_Os09g13740	8041147	8046950	SET domain containing protein, expressed
765			LOC_Os09g13750	8054384	8061110	retrotransposon protein, putative, Ty3-gypsy subclass, expressed
766			LOC_Os09g13760	8063929	8064341	retrotransposon protein, putative, unclassified
767			LOC_Os09g13770	8066658	8067308	retrotransposon protein, putative, unclassified, expressed
768			LOC_Os09g13780	8070498	8074806	retrotransposon protein, putative, unclassified, expressed
769			LOC_Os09g13790	8081459	8085415	retrotransposon protein, putative, Ty1-copia subclass, expressed
770			LOC_Os09g13800	8086717	8089094	retrotransposon protein, putative, Ty1-copia subclass, expressed
771			LOC_Os09g13810	8102792	8103018	expressed protein
772			LOC_Os09g13820	8118804	8123212	pollen signalling protein with adenylyl cyclase activity, putative, expressed
773			LOC_Os09g13830	8124640	8125409	expressed protein
774			LOC_Os09g13850	8137160	8138557	retrotransposon protein, putative, unclassified, expressed
775			LOC_Os09g13860	8139564	8141808	retrotransposon protein, putative, unclassified
776			LOC_Os09g13870	8151807	8158350	lipid phosphatase protein, putative, expressed
777			LOC_Os09g13870	8151807	8158611	lipid phosphatase protein, putative, expressed
778			LOC_Os09g13870	8151807	8158350	lipid phosphatase protein, putative, expressed
779			LOC_Os09g13870	8152619	8158350	lipid phosphatase protein, putative, expressed
780			LOC_Os09g13880	8165969	8169058	SWIM zinc finger family protein, putative, expressed
781			LOC_Os09g13890	8173211	8177505	calmodulin binding protein, putative, expressed
782			LOC_Os09g13900	8181836	8185349	transposon protein, putative, CACTA, En/Spm sub-class, expressed
783			LOC_Os09g13910	8186978	8191585	transposon protein, putative, CACTA, En/Spm sub-class, expressed
784			LOC_Os09g13920	8194300	8195567	expressed protein
785			LOC_Os09g13930	8198943	8199755	LTPL4 - Protease inhibitor/seed storage/LTP family protein precursor, expressed
786			LOC_Os09g13940	8199884	8203348	AP2 domain containing protein, expressed
787			LOC_Os09g13940	8199884	8203348	AP2 domain containing protein, expressed
788			LOC_Os09g13940	8199884	8203192	AP2 domain containing protein, expressed
789			LOC_Os09g13940	8199884	8203350	AP2 domain containing protein, expressed
790			LOC_Os09g13940	8201686	8202666	AP2 domain containing protein, expressed
791			LOC_Os09g13970	8228447	8231159	retrotransposon protein, putative, Ty3-gypsy subclass
792			LOC_Os09g13980	8234601	8237630	retrotransposon protein, putative, Ty3-gypsy subclass, expressed
793			LOC_Os09g13990	8244988	8246259	retrotransposon protein, putative, unclassified
794			LOC_Os09g14000	8247630	8248257	retrotransposon protein, putative, unclassified
795			LOC_Os09g14010	8264589	8268015	disease resistance protein RPS2, putative, expressed
796			LOC_Os09g14019	8282691	8286162	expressed protein
797			LOC_Os09g14040	8302097	8303830	transposon protein, putative, unclassified, expressed
798			LOC_Os09g14050	8309107	8309487	expressed protein
799			LOC_Os09g14060	8313344	8316031	disease resistance protein RPS2, putative, expressed
800			LOC_Os09g14070	8330216	8330974	retrotransposon protein, putative, Ty1-copia subclass
801			LOC_Os09g14080	8334202	8337590	retrotransposon protein, putative, unclassified, expressed
802			LOC_Os09g14090	8339253	8340230	retrotransposon protein, putative, unclassified
803			LOC_Os09g14100	8348957	8354350	disease resistance protein RPS2, putative, expressed
804			LOC_Os09g14110	8355913	8362135	retrotransposon protein, putative, unclassified, expressed
805			LOC_Os09g14120	8363305	8371088	retrotransposon protein, putative, unclassified, expressed
806			LOC_Os09g14130	8372187	8373272	hypothetical protein
807			LOC_Os09g14140	8376166	8377017	retrotransposon protein, putative, unclassified, expressed
808			LOC_Os09g14150	8378264	8380388	retrotransposon protein, putative, LINE subclass
809			LOC_Os09g14160	8382224	8385511	transposon protein, putative, Mutator sub-class, expressed
810			LOC_Os09g14170	8385993	8386551	expressed protein
811			LOC_Os09g14180	8388418	8390942	retrotransposon protein, putative, unclassified, expressed
812			LOC_Os09g14190	8394077	8394565	retrotransposon protein, putative, unclassified
813			LOC_Os09g14200	8394992	8397436	retrotransposon protein, putative, unclassified, expressed
814			LOC_Os09g14210	8398366	8401724	retrotransposon protein, putative, unclassified, expressed
815			LOC_Os09g14220	8411053	8412342	retrotransposon protein, putative, unclassified, expressed
816			LOC_Os09g14230	8416045	8416869	retrotransposon protein, putative, unclassified
817			LOC_Os09g14240	8418804	8419533	expressed protein
818			LOC_Os09g14250	8425819	8428327	transposon protein, putative, Pong sub-class, expressed
819			LOC_Os09g14260	8429231	8436616	transposon protein, putative, CACTA, En/Spm sub-class, expressed
820			LOC_Os09g14270	8438288	8439650	transposon protein, putative, CACTA, En/Spm sub-class, expressed
821			LOC_Os09g14280	8442207	8445152	retrotransposon protein, putative, Ty3-gypsy subclass, expressed
822			LOC_Os09g14290	8448275	8448928	retrotransposon protein, putative, Ty3-gypsy subclass, expressed
823			LOC_Os09g14300	8452141	8452900	retrotransposon protein, putative, unclassified
824			LOC_Os09g14310	8453987	8455336	retrotransposon protein, putative, Ty3-gypsy subclass
825			LOC_Os09g14320	8459044	8461424	retrotransposon protein, putative, Ty3-gypsy subclass, expressed
826			LOC_Os09g14330	8464899	8466152	retrotransposon protein, putative, unclassified
827			LOC_Os09g14340	8471287	8475690	retrotransposon protein, putative, Ty3-gypsy subclass, expressed
828			LOC_Os09g14350	8476969	8479518	retrotransposon protein, putative, Ty3-gypsy subclass
829			LOC_Os09g14360	8481463	8484915	retrotransposon protein, putative, Ty3-gypsy subclass, expressed
830			LOC_Os09g14370	8487359	8490755	retrotransposon protein, putative, unclassified, expressed
831			LOC_Os09g14380	8494471	8495840	retrotransposon protein, putative, Ty3-gypsy subclass
832			LOC_Os09g14390	8497999	8500397	transposon protein, putative, CACTA, En/Spm sub-class, expressed
833			LOC_Os09g14400	8504916	8506015	expressed protein
834			LOC_Os09g14410	8510737	8516543	expressed protein
835			LOC_Os09g14420	8519840	8520247	expressed protein
836			LOC_Os09g14430	8524346	8531954	transposon protein, putative, CACTA, En/Spm sub-class, expressed
837			LOC_Os09g14450	8537185	8541654	pollen signalling protein with adenylyl cyclase activity, putative, expressed
838			LOC_Os09g14460	8549609	8550699	retrotransposon protein, putative, unclassified
839			LOC_Os09g14470	8552278	8556713	retrotransposon protein, putative, unclassified, expressed
840			LOC_Os09g14480	8558252	8563774	transposon protein, putative, CACTA, En/Spm sub-class, expressed
841			LOC_Os09g14490	8564278	8572456	TIR-NBS type disease resistance protein, putative, expressed
842			LOC_Os09g14500	8572671	8577476	retrotransposon protein, putative, unclassified, expressed
843			LOC_Os09g14510	8585970	8589949	peroxin-3 family protein, putative, expressed
844			LOC_Os09g14510	8585970	8589949	peroxin-3 family protein, putative, expressed
845			LOC_Os09g14510	8586239	8589949	peroxin-3 family protein, putative, expressed
846			LOC_Os09g14520	8590518	8592972	integral membrane protein, putative, expressed
847			LOC_Os09g14530	8594721	8597310	hAT dimerisation domain-containing protein, putative
848			LOC_Os09g14540	8603462	8609274	protein phosphatase 2C, putative, expressed
849			LOC_Os09g14550	8613403	8618111	RNA recognition motif containing protein, putative, expressed
850			LOC_Os09g14560	8623667	8626180	expressed protein
851			LOC_Os09g14570	8629025	8629738	tropinone reductase, putative, expressed
852			LOC_Os09g14580	8630075	8633198	protein kinase domain containing protein, expressed
853			LOC_Os09g14590	8636424	8641335	proteasome maturation factor UMP1 family protein, expressed
854			LOC_Os09g14600	8644137	8646467	peroxisomal membrane protein-related, putative, expressed
855			LOC_Os09g14610	8646683	8653977	DCL2, putative, expressed
856			LOC_Os09g14610	8646683	8652037	DCL2, putative, expressed
857			LOC_Os09g14610	8646683	8655252	DCL2, putative, expressed
858			LOC_Os09g14614	8665792	8667873	serine/arginine repetitive matrix protein 1, putative, expressed
859			LOC_Os09g14614	8665792	8667873	serine/arginine repetitive matrix protein 1, putative, expressed
860			LOC_Os09g14614	8665902	8667873	serine/arginine repetitive matrix protein 1, putative, expressed
861			LOC_Os09g14620	8671529	8674279	retrotransposon protein, putative, unclassified, expressed
862			LOC_Os09g14630	8677238	8680937	retrotransposon protein, putative, unclassified, expressed
863			LOC_Os09g14640	8682708	8684765	expressed protein
864			LOC_Os09g14650	8685057	8685711	transposon protein, putative, Pong sub-class, expressed
865			LOC_Os09g14660	8689906	8691855	legume lectins beta domain containing protein, putative, expressed
866			LOC_Os09g14670	8692191	8697573	phosphoenolpyruvate carboxylase, putative, expressed
867			LOC_Os09g14680	8710149	8716892	expressed protein
868			LOC_Os09g14690	8719942	8725370	retrotransposon protein, putative, unclassified, expressed
869			LOC_Os09g14700	8726763	8729680	2-aminoethanethiol dioxygenase, putative, expressed
870			LOC_Os09g14700	8726763	8729680	2-aminoethanethiol dioxygenase, putative, expressed
871			LOC_Os09g14710	8736818	8739889	retrotransposon protein, putative, unclassified, expressed
872			LOC_Os09g14720	8740697	8746773	retrotransposon protein, putative, unclassified, expressed
873			LOC_Os09g14730	8750519	8754916	retrotransposon protein, putative, Ty3-gypsy subclass, expressed
874			LOC_Os09g14740	8755596	8758531	retrotransposon protein, putative, unclassified, expressed
875			LOC_Os09g14750	8771115	8772644	retrotransposon protein, putative, unclassified
876			LOC_Os09g14760	8776044	8776421	expressed protein
877			LOC_Os09g14770	8785748	8789645	retrotransposon protein, putative, unclassified, expressed
878			LOC_Os09g14780	8792418	8793436	retrotransposon, putative, centromere-specific, expressed
879			LOC_Os09g14790	8797539	8802090	retrotransposon protein, putative, Ty3-gypsy subclass, expressed
880			LOC_Os09g14800	8812486	8818641	transposon protein, putative, unclassified, expressed
881			LOC_Os09g14810	8819282	8822215	retrotransposon protein, putative, unclassified, expressed
882			LOC_Os09g14820	8824403	8826933	retrotransposon protein, putative, unclassified, expressed
883			LOC_Os09g14830	8838493	8844648	transposon protein, putative, unclassified, expressed
884			LOC_Os09g14840	8845291	8846940	retrotransposon protein, putative, unclassified, expressed
885			LOC_Os09g14850	8858600	8863587	retrotransposon protein, putative, unclassified, expressed
886			LOC_Os09g14860	8864338	8867727	retrotransposon protein, putative, unclassified, expressed
887			LOC_Os09g14870	8868796	8873868	expressed protein
888			LOC_Os09g14880	8879454	8883845	transposon protein, putative, Pong sub-class, expressed
889			LOC_Os09g14890	8889533	8890135	expressed protein
890			LOC_Os09g14900	8899672	8904528	retrotransposon protein, putative, unclassified
891			LOC_Os09g14910	8911419	8911959	expressed protein
892			LOC_Os09g14920	8913628	8916024	hypothetical protein
893			LOC_Os09g14930	8942335	8946762	retrotransposon protein, putative, Ty1-copia subclass, expressed
894			LOC_Os09g14940	8947350	8948123	retrotransposon protein, putative, Ty1-copia subclass
895			LOC_Os09g14950	8965293	8965775	expressed protein
896			LOC_Os09g14960	8969316	8973897	transposon protein, putative, Pong sub-class, expressed
897			LOC_Os09g14960	8969316	8973897	transposon protein, putative, Pong sub-class, expressed
898			LOC_Os09g14970	8980276	8981385	hypothetical protein
899			LOC_Os09g14980	8992835	8993662	retrotransposon protein, putative, Ty3-gypsy subclass, expressed
900			LOC_Os09g14990	8994603	8998254	retrotransposon protein, putative, Ty1-copia subclass, expressed
901			LOC_Os09g15000	9031994	9034713	retrotransposon protein, putative, unclassified, expressed
902			LOC_Os09g15010	9035177	9041126	retrotransposon protein, putative, unclassified, expressed
903			LOC_Os09g15020	9053616	9058328	retrotransposon protein, putative, unclassified, expressed
904			LOC_Os09g15030	9065872	9069946	retrotransposon protein, putative, Ty1-copia subclass, expressed
905			LOC_Os09g15040	9073688	9075130	hypothetical protein
906			LOC_Os09g15044	9087462	9088467	expressed protein
907			LOC_Os09g15050	9096555	9101314	ent-kaurene synthase A, chloroplast precursor, putative, expressed
908			LOC_Os09g15060	9105917	9111420	expressed protein
909			LOC_Os09g15070	9120451	9122146	expressed protein
910			LOC_Os09g15090	9146533	9151236	transposon protein, putative, CACTA, En/Spm sub-class, expressed
911			LOC_Os09g15100	9152783	9154214	retrotransposon protein, putative, unclassified, expressed
912			LOC_Os09g15120	9176902	9179869	retrotransposon protein, putative, Ty3-gypsy subclass, expressed
913			LOC_Os09g15130	9180361	9182567	retrotransposon protein, putative, Ty3-gypsy subclass, expressed
914			LOC_Os09g15140	9183379	9186303	retrotransposon protein, putative, unclassified, expressed
915			LOC_Os09g15150	9198452	9198768	expressed protein
916			LOC_Os09g15160	9202210	9204453	retrotransposon protein, putative, unclassified
917			LOC_Os09g15170	9206558	9211740	nucleobase-ascorbate transporter, putative, expressed
918			LOC_Os09g15180	9215023	9219388	transposon protein, putative, unclassified, expressed
919			LOC_Os09g15190	9220535	9221635	expressed protein
920			LOC_Os09g15200	9228998	9231566	ankyrin repeat family protein, putative, expressed
921			LOC_Os09g15210	9233699	9234598	retrotransposon protein, putative, unclassified, expressed
922			LOC_Os09g15220	9238165	9243849	retrotransposon protein, putative, unclassified, expressed
923			LOC_Os09g15230	9245915	9246868	expressed protein
924			LOC_Os09g15240	9251214	9255028	carotenoid cleavage dioxygenase, putative, expressed
925			LOC_Os09g15250	9264206	9269416	retrotransposon protein, putative, unclassified, expressed
926			LOC_Os09g15260	9283477	9284036	hypothetical protein
927			LOC_Os09g15270	9309122	9314851	retrotransposon protein, putative, unclassified, expressed
928			LOC_Os09g15280	9315702	9316655	retrotransposon protein, putative, unclassified, expressed
929			LOC_Os09g15284	9319983	9322013	expressed protein
930			LOC_Os09g15290	9322662	9322981	expressed protein
931			LOC_Os09g15300	9326004	9334888	transposon protein, putative, CACTA, En/Spm sub-class, expressed
932			LOC_Os09g15310	9341115	9341720	expressed protein
933			LOC_Os09g15320	9357955	9362416	ubiquitin-conjugating enzyme, putative, expressed
934			LOC_Os09g15320	9357985	9362416	ubiquitin-conjugating enzyme, putative, expressed
935			LOC_Os09g15330	9366323	9370328	transporter family protein, putative, expressed
936			LOC_Os09g15330	9366323	9370327	transporter family protein, putative, expressed
937			LOC_Os09g15340	9379745	9383838	hydrolase, NUDIX family, domain containing protein, expressed
938			LOC_Os09g15350	9385267	9387226	expressed protein
939			LOC_Os09g15350	9385278	9387636	expressed protein
940			LOC_Os09g15360	9389783	9391402	hypothetical protein
1	qZnPR.6.2	LG06	LOC_Os06g47320	28682052	28687078	T-complex protein, putative, expressed
2			LOC_Os06g47330	28688794	28694061	dynamin family protein, putative, expressed
3			LOC_Os06g47330	28688837	28694061	dynamin family protein, putative, expressed
4			LOC_Os06g47340	28694851	28698503	glycosyltransferase family 43 protein, putative, expressed
5			LOC_Os06g47350	28699601	28706489	RNA polymerase I specific transcription initiation factor RRN3 family protein, putative, expressed
6			LOC_Os06g47350	28699602	28706489	RNA polymerase I specific transcription initiation factor RRN3 family protein, putative, expressed
7			LOC_Os06g47360	28707248	28708381	beta-expansin precursor, putative, expressed
8			LOC_Os06g47370	28710013	28712974	retrotransposon protein, putative, Ty3-gypsy subclass
9			LOC_Os06g47380	28713291	28719380	retrotransposon protein, putative, Ty3-gypsy subclass, expressed
10			LOC_Os06g47390	28720939	28721585	conserved hypothetical protein
11			LOC_Os06g47400	28723595	28724356	OsFBX204 - F-box domain containing protein, expressed
12			LOC_Os06g47410	28725241	28726529	expressed protein
13			LOC_Os06g47420	28726645	28728264	transposon protein, putative, unclassified, expressed
14			LOC_Os06g47430	28732632	28734315	expressed protein
15			LOC_Os06g47440	28736300	28738620	expressed protein
16			LOC_Os06g47450	28742344	28742708	hypothetical protein
17			LOC_Os06g47460	28742939	28747112	expressed protein
18			LOC_Os06g47470	28752549	28757410	TKL_IRAK_DUF26-lh.2 - DUF26 kinases have homology to DUF26 containing loci, expressed
19			LOC_Os06g47480	28758887	28759375	expressed protein
20			LOC_Os06g47490	28759949	28761041	expressed protein
21			LOC_Os06g47500	28762360	28762870	retrotransposon protein, putative, Ty3-gypsy subclass
22			LOC_Os06g47510	28763054	28766010	retrotransposon protein, putative, Ty3-gypsy subclass, expressed
23			LOC_Os06g47520	28768494	28771067	expressed protein
24			LOC_Os06g47530	28769505	28774431	TKL_IRAK_DUF26-lh.6 - DUF26 kinases have homology to DUF26 containing loci, expressed
25			LOC_Os06g47540	28777681	28779892	expressed protein
26			LOC_Os06g47544	28787764	28788344	expressed protein
27			LOC_Os06g47550	28789015	28797545	cadmium/zinc-transporting ATPase, putative, expressed
28			LOC_Os06g47550	28789015	28797545	cadmium/zinc-transporting ATPase, putative, expressed
29			LOC_Os06g47550	28789015	28797545	cadmium/zinc-transporting ATPase, putative, expressed
30			LOC_Os06g47560	28799017	28799513	expressed protein
31			LOC_Os06g47570	28801751	28804726	PPR repeat containing protein, expressed
32			LOC_Os06g47580	28806701	28816144	REV1, putative, expressed
33			LOC_Os06g47580	28806701	28816144	REV1, putative, expressed
34			LOC_Os06g47580	28806781	28816144	REV1, putative, expressed
35			LOC_Os06g47590	28818162	28819180	AP2 domain containing protein, expressed
36			LOC_Os06g47600	28825830	28827036	thaumatin family domain containing protein, expressed
37			LOC_Os06g47610	28830640	28831503	transposon protein, putative, unclassified, expressed
38			LOC_Os06g47620	28831589	28837128	peptidase, putative, expressed
39			LOC_Os06g47630	28846112	28846936	expressed protein
40			LOC_Os06g47640	28847257	28848022	OsCML29 - Calmodulin-related calcium sensor protein, expressed
41			LOC_Os06g47650	28853371	28856936	phytosulfokine receptor precursor, putative, expressed
42			LOC_Os06g47670	28857672	28858259	hypothetical protein
43			LOC_Os06g47680	28859088	28860392	OsFBX205 - F-box domain containing protein, expressed
44			LOC_Os06g47690	28863875	28864998	expressed protein
45			LOC_Os06g47700	28867475	28871006	serine/threonine-protein kinase BRI1-like 2 precursor, putative, expressed
46			LOC_Os06g47710	28872387	28873805	leucine-rich repeat receptor-like kinase, putative, expressed
47			LOC_Os06g47720	28874838	28878068	serine/threonine-protein kinase BRI1-like 2 precursor, putative, expressed
48			LOC_Os06g47730	28881108	28887001	retrotransposon protein, putative, Ty1-copia subclass, expressed
49			LOC_Os06g47740	28888959	28892150	phytosulfokine receptor precursor, putative, expressed
50			LOC_Os06g47750	28898441	28901943	phytosulfokine receptor precursor, putative, expressed
51			LOC_Os06g47760	28905577	28909089	phytosulfokine receptor precursor, putative, expressed
52			LOC_Os06g47770	28910275	28914944	expressed protein
53			LOC_Os06g47780	28918691	28923568	TKL_IRAK_DUF26-lh.3 - DUF26 kinases have homology to DUF26 containing loci, expressed
54			LOC_Os06g47800	28926195	28930077	disease resistance protein RGA3, putative, expressed
55			LOC_Os06g47810	28935216	28939457	retrotransposon protein, putative, Ty1-copia subclass, expressed
56			LOC_Os06g47820	28941271	28943704	protein kinase domain containing protein, expressed
57			LOC_Os06g47830	28946879	28950601	RPA2C - Putative single-stranded DNA binding complex subunit 2, expressed
58			LOC_Os06g47834	28950823	28953456	expressed protein
59			LOC_Os06g47834	28952913	28953456	expressed protein
60			LOC_Os06g47840	28954541	28957840	ZOS6-08 - C2H2 zinc finger protein, expressed
61			LOC_Os06g47850	28958626	28960418	zinc finger family protein, putative, expressed
62			LOC_Os06g47860	28962559	28964770	expressed protein
63			LOC_Os06g47860	28962559	28965940	expressed protein
64			LOC_Os06g47870	28966758	28967624	expressed protein
65			LOC_Os06g47880	28967974	28969110	cell division control protein 2 homolog 3, putative, expressed
66			LOC_Os06g47890	28969488	28974576	OsFBO9 - F-box and other domain containing protein, expressed
67			LOC_Os06g47890	28969532	28974576	OsFBO9 - F-box and other domain containing protein, expressed
68			LOC_Os06g47900	28977492	28980804	expressed protein
69			LOC_Os06g47900	28977492	28978790	expressed protein
70			LOC_Os06g47900	28977492	28980784	expressed protein
71			LOC_Os06g47900	28977492	28980804	expressed protein
72			LOC_Os06g47910	28981124	28983436	GDSL-like lipase/acylhydrolase, putative, expressed
73			LOC_Os06g47920	28985775	28987849	pentatricopeptide repeat domain containing protein, putative, expressed
74			LOC_Os06g47930	28988077	28990335	expressed protein
75			LOC_Os06g47940	28993796	28995033	nifU, putative, expressed
76			LOC_Os06g47950	28995477	28997357	tetratricopeptide-like helical, putative, expressed
77			LOC_Os06g47960	28998828	28999481	nucleic acid binding protein, putative, expressed
78			LOC_Os06g47970	29002132	29003608	expressed protein
79			LOC_Os06g47980	29011061	29011585	expressed protein
80			LOC_Os06g47990	29013147	29019044	transposon protein, putative, unclassified, expressed
81			LOC_Os06g48000	29021793	29023492	peroxidase precursor, putative, expressed
82			LOC_Os06g48010	29027003	29028481	peroxidase precursor, putative, expressed
83			LOC_Os06g48020	29035686	29038299	peroxidase precursor, putative, expressed
84			LOC_Os06g48030	29050768	29054613	peroxidase precursor, putative, expressed
85			LOC_Os06g48030	29050768	29054613	peroxidase precursor, putative, expressed
86			LOC_Os06g48040	29059687	29063780	zinc finger, C3HC4 type domain containing protein, expressed
87			LOC_Os06g48050	29068582	29071757	expressed protein
88			LOC_Os06g48050	29068772	29071757	expressed protein
89			LOC_Os06g48060	29072350	29076031	ABC transporter, ATP-binding protein, putative, expressed
90			LOC_Os06g48065	29078353	29080307	Zinc finger, C3HC4 type domain containing protein, expressed
91			LOC_Os06g48070	29086083	29089669	retrotransposon protein, putative, Ty3-gypsy subclass, expressed
92			LOC_Os06g48080	29093082	29094766	retrotransposon protein, putative, Ty3-gypsy subclass, expressed
93			LOC_Os06g48090	29095903	29102041	retrotransposon protein, putative, unclassified, expressed
94			LOC_Os06g48100	29102669	29105811	retrotransposon protein, putative, unclassified, expressed
95			LOC_Os06g48110	29111102	29115616	retrotransposon protein, putative, Ty3-gypsy subclass, expressed
96			LOC_Os06g48120	29115871	29117852	retrotransposon protein, putative, Ty3-gypsy subclass
97			LOC_Os06g48130	29119041	29120854	retrotransposon protein, putative, Ty3-gypsy subclass
98			LOC_Os06g48140	29121166	29124344	retrotransposon protein, putative, Ty3-gypsy subclass, expressed
99			LOC_Os06g48150	29126047	29126379	expressed protein
100			LOC_Os06g48160	29133001	29134771	glycosyl hydrolases family 16, putative, expressed
101			LOC_Os06g48170	29137237	29139250	glycosyl hydrolases family 16, putative, expressed
102			LOC_Os06g48180	29144888	29146562	glycosyl hydrolases family 16, putative, expressed
103			LOC_Os06g48180	29144888	29146562	glycosyl hydrolases family 16, putative, expressed
104			LOC_Os06g48190	29147379	29148622	expressed protein
105			LOC_Os06g48200	29156425	29157883	glycosyl hydrolases family 16, putative, expressed
106			LOC_Os06g48210	29163789	29166834	DEAD-box ATP-dependent RNA helicase, putative, expressed
107			LOC_Os06g48220	29171334	29172170	expressed protein
108			LOC_Os06g48230	29173195	29175608	DNA-directed RNA polymerases I, II, and III subunit RPABC3, putative, expressed
109			LOC_Os06g48230	29173937	29175608	DNA-directed RNA polymerases I, II, and III subunit RPABC3, putative, expressed
110			LOC_Os06g48235	29175691	29177070	expressed protein
111			LOC_Os06g48240	29180250	29181960	AAA ATPase, putative, expressed
112			LOC_Os06g48250	29184362	29186298	ATPase, putative, expressed
113			LOC_Os06g48260	29187077	29187280	expressed protein
114			LOC_Os06g48270	29189143	29191425	expressed protein
115			LOC_Os06g48280	29193773	29194966	expressed protein
116			LOC_Os06g48290	29198270	29199356	homeobox associated leucine zipper, putative, expressed
117			LOC_Os06g48300	29208086	29210947	protein phosphatase 2C, putative, expressed
118			LOC_Os06g48310	29211701	29212000	RNA recognition motif containing protein, expressed
119			LOC_Os06g48320	29215231	29219166	EDR2, putative, expressed
120			LOC_Os06g48320	29217410	29219166	EDR2, putative, expressed
121			LOC_Os06g48330	29231004	29233944	ATEXO70G1, putative, expressed
122			LOC_Os06g48340	29234080	29234402	hypothetical protein
123			LOC_Os06g48350	29234804	29238557	CPuORF14 - conserved peptide uORF-containing transcript, expressed
124			LOC_Os06g48355	29235212	29236564	expressed protein
125			LOC_Os06g48360	29242624	29243391	retrotransposon protein, putative, Ty3-gypsy subclass
126			LOC_Os06g48370	29246544	29252250	retrotransposon protein, putative, Ty3-gypsy subclass, expressed
127			LOC_Os06g48380	29255938	29261644	retrotransposon protein, putative, Ty3-gypsy subclass, expressed
128			LOC_Os06g48390	29265333	29268578	retrotransposon protein, putative, Ty3-gypsy subclass, expressed
129			LOC_Os06g48400	29272065	29274294	retrotransposon protein, putative, Ty3-gypsy subclass, expressed
130			LOC_Os06g48410	29281206	29282555	retrotransposon protein, putative, Ty3-gypsy subclass
131			LOC_Os06g48420	29287813	29289162	retrotransposon protein, putative, Ty3-gypsy subclass
132			LOC_Os06g48430	29293399	29299946	retrotransposon protein, putative, Ty3-gypsy subclass, expressed
133			LOC_Os06g48440	29302715	29312084	retrotransposon protein, putative, Ty3-gypsy subclass, expressed
134			LOC_Os06g48450	29314791	29317299	retrotransposon protein, putative, Ty3-gypsy subclass
135			LOC_Os06g48460	29318877	29321817	retrotransposon protein, putative, Ty3-gypsy subclass, expressed
136			LOC_Os06g48470	29322134	29328223	retrotransposon protein, putative, Ty3-gypsy subclass
137			LOC_Os06g48480	29328606	29329058	retrotransposon protein, putative, Ty3-gypsy subclass
138			LOC_Os06g48490	29334885	29337233	retrotransposon protein, putative, unclassified
139			LOC_Os06g48500	29341864	29343967	expressed protein
140			LOC_Os06g48500	29341864	29343967	expressed protein
141			LOC_Os06g48510	29347847	29352146	choline monooxygenase, chloroplast precursor, putative, expressed
142			LOC_Os06g48520	29352930	29356136	disease resistance protein RPM1, putative, expressed
143			LOC_Os06g48530	29357512	29364555	ZOS6-09 - C2H2 zinc finger protein, expressed
144			LOC_Os06g48534	29365981	29370366	GATA transcription factor 25, putative, expressed
145			LOC_Os06g48540	29375614	29376222	retrotransposon protein, putative, Ty3-gypsy subclass
146			LOC_Os06g48550	29377996	29378951	expressed protein
147			LOC_Os06g48560	29381137	29382655	transferase family protein, putative, expressed
148			LOC_Os06g48570	29383237	29386915	Ser/Thr protein phosphatase family protein, putative, expressed
149			LOC_Os06g48580	29390779	29394945	retrotransposon protein, putative, unclassified, expressed
150			LOC_Os06g48590	29398207	29402539	CGMC_MAPKCMGC_2_SLT2y_ERK.2 - CGMC includes CDA, MAPK, GSK3, and CLKC kinases, expressed
151			LOC_Os06g48590	29398895	29402631	CGMC_MAPKCMGC_2_SLT2y_ERK.2 - CGMC includes CDA, MAPK, GSK3, and CLKC kinases, expressed
152			LOC_Os06g48600	29402705	29403741	macrophage migration inhibitory factor, putative, expressed
153			LOC_Os06g48610	29407744	29412038	CCT motif family protein, expressed
154			LOC_Os06g48620	29413392	29418992	4-amino-4-deoxychorismate synthase, putative, expressed
155			LOC_Os06g48630	29419862	29422851	ANTH/ENTH domain containing protein, putative, expressed
156			LOC_Os06g48640	29423023	29431646	proteasome/cyclosome repeat containing protein, expressed
157			LOC_Os06g48640	29423023	29431646	proteasome/cyclosome repeat containing protein, expressed
158			LOC_Os06g48640	29423023	29431646	proteasome/cyclosome repeat containing protein, expressed
159			LOC_Os06g48650	29434356	29441106	OsSub52 - Putative Subtilisin homologue, expressed
160			LOC_Os06g48650	29434401	29441099	OsSub52 - Putative Subtilisin homologue, expressed
161			LOC_Os06g48650	29435100	29441099	OsSub52 - Putative Subtilisin homologue, expressed
162			LOC_Os06g48660	29441619	29444248	DEFL21 - Defensin and Defensin-like DEFL family, expressed
163			LOC_Os06g48665	29443363	29443809	expressed protein
164			LOC_Os06g48680	29446623	29447535	expressed protein
165			LOC_Os06g48690	29460031	29460944	DEFL12 - Defensin and Defensin-like DEFL family, expressed
166			LOC_Os06g48700	29462262	29467332	DNA binding protein, putative, expressed
167			LOC_Os06g48710	29468257	29470437	transposon protein, putative, unclassified
168			LOC_Os06g48720	29477949	29480905	cadmium/zinc-transporting ATPase 4, putative, expressed
169			LOC_Os06g48730	29497450	29498007	transposon protein, putative, CACTA, En/Spm sub-class, expressed
170			LOC_Os06g48740	29501751	29502835	expressed protein
171			LOC_Os06g48750	29503679	29507318	DEAD-box ATP-dependent RNA helicase, putative, expressed
172			LOC_Os06g48750	29503679	29507318	DEAD-box ATP-dependent RNA helicase, putative, expressed
173			LOC_Os06g48750	29503679	29507314	DEAD-box ATP-dependent RNA helicase, putative, expressed
174			LOC_Os06g48760	29508824	29515309	UTP--glucose-1-phosphate uridylyltransferase, putative, expressed
175			LOC_Os06g48760	29508824	29515309	UTP--glucose-1-phosphate uridylyltransferase, putative, expressed
176			LOC_Os06g48770	29516243	29523983	OsSBeL1 - Putative Serine Beta-Lactamase homologue, expressed
177			LOC_Os06g48770	29516243	29523982	OsSBeL1 - Putative Serine Beta-Lactamase homologue, expressed
178			LOC_Os06g48780	29527352	29528953	60S acidic ribosomal protein, putative, expressed
179			LOC_Os06g48790	29530045	29533720	expressed protein
180			LOC_Os06g48800	29534805	29536553	OsHKT2;4 - Na+ transporter, expressed
181			LOC_Os06g48810	29538934	29541219	OsHKT2;1 - Na+ transporter, expressed
182			LOC_Os06g48820	29547211	29547690	retrotransposon protein, putative, unclassified
183			LOC_Os06g48830	29554258	29555028	hypothetical protein
184			LOC_Os06g48850	29577974	29578378	OsSAUR27 - Auxin-responsive SAUR gene family member, expressed
185			LOC_Os06g48860	29580155	29580898	OsSAUR28 - Auxin-responsive SAUR gene family member, expressed
186			LOC_Os06g48870	29590658	29595770	methyl-binding domain protein MBD, putative, expressed
187			LOC_Os06g48880	29596074	29598295	expressed protein
188			LOC_Os06g48900	29604897	29611069	retrotransposon protein, putative, Ty3-gypsy subclass, expressed
189			LOC_Os06g48889	29611917	29612348	retrotransposon protein, putative, Ty3-gypsy subclass
190			LOC_Os06g48920	29616223	29619289	expressed protein
191			LOC_Os06g48930	29620476	29622473	expressed protein
192			LOC_Os06g48940	29626216	29634689	GHMP kinases ATP-binding protein, putative, expressed
193			LOC_Os06g48950	29656969	29665195	auxin response factor 19, putative, expressed
194			LOC_Os06g48960	29665219	29667372	AIG2-like family domain containing protein, expressed
195			LOC_Os06g48970	29670435	29673508	expressed protein
196			LOC_Os06g48970	29670680	29673508	expressed protein
197			LOC_Os06g48980	29675090	29678081	protein kinase APK1B, chloroplast precursor, putative, expressed
198			LOC_Os06g48990	29679380	29690111	Leucine Rich Repeat family protein, expressed
199			LOC_Os06g48990	29679418	29690111	Leucine Rich Repeat family protein, expressed
200			LOC_Os06g49000	29696560	29702353	expressed protein
201			LOC_Os06g49000	29696580	29703216	expressed protein
202			LOC_Os06g49010	29703530	29708554	OsSPL12 - SBP-box gene family member, expressed
203			LOC_Os06g49010	29703530	29708350	OsSPL12 - SBP-box gene family member, expressed
204			LOC_Os06g49010	29703530	29707971	OsSPL12 - SBP-box gene family member, expressed
205			LOC_Os06g49010	29703530	29707989	OsSPL12 - SBP-box gene family member, expressed
206			LOC_Os06g49010	29703530	29708687	OsSPL12 - SBP-box gene family member, expressed
207			LOC_Os06g49010	29703530	29708260	OsSPL12 - SBP-box gene family member, expressed
208			LOC_Os06g49020	29711341	29712715	26S proteasome non-ATPase regulatory subunit 14, putative, expressed
209			LOC_Os06g49030	29713411	29717017	activator of 90 kDa heat shock protein ATPase homolog, putative, expressed
210			LOC_Os06g49030	29713411	29717017	activator of 90 kDa heat shock protein ATPase homolog, putative, expressed
211			LOC_Os06g49040	29723457	29727122	Myb-like DNA-binding domain containing protein, putative, expressed
212			LOC_Os06g49050	29727335	29731975	hAT dimerisation domain containing protein, expressed
213			LOC_Os06g49060	29733805	29737192	ternary complex factor MIP1, putative, expressed
214			LOC_Os06g49070	29737484	29738307	expressed protein
215			LOC_Os06g49080	29738880	29742503	zinc finger C-x8-C-x5-C-x3-H type family protein, expressed
216			LOC_Os06g49090	29744300	29750636	transposon protein, putative, unclassified, expressed
217			LOC_Os06g49090	29744300	29750632	transposon protein, putative, unclassified, expressed
218			LOC_Os06g49100	29754545	29756479	retrotransposon protein, putative, unclassified, expressed
219			LOC_Os06g49110	29757045	29761643	delta-aminolevulinic acid dehydratase, chloroplast precursor, putative, expressed
220			LOC_Os06g49110	29757045	29761659	delta-aminolevulinic acid dehydratase, chloroplast precursor, putative, expressed
221			LOC_Os06g49110	29757045	29761835	delta-aminolevulinic acid dehydratase, chloroplast precursor, putative, expressed
222			LOC_Os06g49120	29762519	29766745	Complex I intermediate-associated protein 30 domain containing protein, putative, expressed
223			LOC_Os06g49120	29762519	29766745	Complex I intermediate-associated protein 30 domain containing protein, putative, expressed
224			LOC_Os06g49130	29767892	29781103	TAZ zinc finger family protein, expressed
225			LOC_Os06g49130	29770614	29781103	TAZ zinc finger family protein, expressed
226			LOC_Os06g49140	29782067	29784932	ribosomal RNA large subunit methyltransferase J, putative, expressed
227			LOC_Os06g49150	29786288	29788682	exostosin, putative, expressed
228			LOC_Os06g49160	29789098	29790677	thylakoid lumenal 16.5 kDa protein, chloroplast precursor, putative, expressed
229			LOC_Os06g49170	29791163	29795253	OsWAK64 - OsWAK receptor-like protein kinase, expressed
230			LOC_Os06g49180	29798150	29801547	plant-specific domain TIGR01589 family protein, putative, expressed
231			LOC_Os06g49185	29802051	29803832	expressed protein
232			LOC_Os06g49190	29807815	29808464	LTPL154 - Protease inhibitor/seed storage/LTP family protein precursor, expressed
233			LOC_Os06g49200	29808493	29811842	expressed protein
234			LOC_Os06g49210	29814603	29821246	retrotransposon protein, putative, unclassified, expressed
235			LOC_Os06g49220	29824343	29826786	peptide transporter, putative, expressed
236			LOC_Os06g49230	29828470	29829090	peptide transporter, putative, expressed
237			LOC_Os06g49240	29829475	29831124	PTR-like peptide transporter, putatuve, expressed
238			LOC_Os06g49250	29838283	29841400	peptide transporter PTR2, putative, expressed
239			LOC_Os06g49250	29838283	29841400	peptide transporter PTR2, putative, expressed
240			LOC_Os06g49250	29838283	29841400	peptide transporter PTR2, putative, expressed
241			LOC_Os06g49250	29838298	29841400	peptide transporter PTR2, putative, expressed
242			LOC_Os06g49250	29838298	29841400	peptide transporter PTR2, putative, expressed
243			LOC_Os06g49260	29850302	29855921	OsWAK65 - OsWAK receptor-like protein kinase, expressed
244			LOC_Os06g49270	29856652	29860635	retrotransposon protein, putative, Ty1-copia subclass, expressed
245			LOC_Os06g49280	29869310	29869750	retrotransposon protein, putative, Ty1-copia subclass, expressed
246			LOC_Os06g49290	29871178	29871775	acanthoscurrin-1 precursor, putative, expressed
247			LOC_Os06g49300	29872383	29874424	glycosyltransferase protein, putative, expressed
248			LOC_Os06g49310	29877099	29885249	MATE efflux family protein, putative, expressed
249			LOC_Os06g49310	29877099	29885249	MATE efflux family protein, putative, expressed
250			LOC_Os06g49320	29882897	29886728	glycosyltransferase, putative, expressed
251			LOC_Os06g49330	29889939	29890544	expressed protein
252			LOC_Os06g49340	29891030	29892949	OsFBDUF35 - F-box and DUF domain containing protein, expressed
253			LOC_Os06g49350	29897280	29904443	retrotransposon protein, putative, unclassified, expressed
254			LOC_Os06g49360	29905060	29907314	NBS-LRR disease resistance protein, putative, expressed
255			LOC_Os06g49370	29911415	29913078	transposon protein, putative, unclassified, expressed
256			LOC_Os06g49380	29917712	29924540	NBS-LRR disease resistance protein, putative, expressed
257			LOC_Os06g49380	29917712	29924540	NBS-LRR disease resistance protein, putative, expressed
258			LOC_Os06g49380	29917712	29924540	NBS-LRR disease resistance protein, putative, expressed
259			LOC_Os06g49380	29917712	29924540	NBS-LRR disease resistance protein, putative, expressed
260			LOC_Os06g49380	29917712	29924540	NBS-LRR disease resistance protein, putative, expressed
261			LOC_Os06g49380	29917712	29924540	NBS-LRR disease resistance protein, putative, expressed
262			LOC_Os06g49390	29926770	29931821	NBS-LRR disease resistance protein, putative, expressed
263			LOC_Os06g49410	29938344	29938932	expressed protein
264			LOC_Os06g49420	29939757	29948040	retrotransposon protein, putative, unclassified, expressed
265			LOC_Os06g49430	29949829	29954874	CGMC_MAPKCMGC_2.11 - CGMC includes CDA, MAPK, GSK3, and CLKC kinases, expressed
266			LOC_Os06g49430	29950569	29954874	CGMC_MAPKCMGC_2.11 - CGMC includes CDA, MAPK, GSK3, and CLKC kinases, expressed
267			LOC_Os06g49440	29955438	29960777	serine esterase, putative, expressed
268			LOC_Os06g49450	29961036	29967295	expressed protein
269			LOC_Os06g49450	29961036	29967489	expressed protein
270			LOC_Os06g49450	29961036	29967295	expressed protein
271			LOC_Os06g49460	29967952	29970514	Rer1 protein, putative, expressed
272			LOC_Os06g49470	29970999	29973195	peptidyl-prolyl cis-trans isomerase, putative, expressed
273			LOC_Os06g49480	29973845	29976322	peptidyl-prolyl cis-trans isomerase, putative, expressed
274			LOC_Os06g49480	29973886	29976322	peptidyl-prolyl cis-trans isomerase, putative, expressed
275			LOC_Os06g49490	29976868	29977668	ZOS6-10 - C2H2 zinc finger protein, expressed
276			LOC_Os06g49500	29978812	29981991	integral membrane protein, putative, expressed
277			LOC_Os06g49500	29978859	29981991	integral membrane protein, putative, expressed
278			LOC_Os06g49500	29978862	29981991	integral membrane protein, putative, expressed
279			LOC_Os06g49505	29988040	29989101	arogenate dehydrogenase 1, chloroplast precursor, putative, expressed
280			LOC_Os06g49510	29989930	29994451	zinc knuckle family protein, putative, expressed
281			LOC_Os06g49510	29990034	29992228	zinc knuckle family protein, putative, expressed
282			LOC_Os06g49520	29994592	29996123	arogenate dehydrogenase 1, chloroplast precursor, putative, expressed
283			LOC_Os06g49530	29996311	29999223	OsFBX206 - F-box domain containing protein, expressed
284			LOC_Os06g49540	30000122	30006102	transposon protein, putative, unclassified, expressed
285			LOC_Os06g49550	30008093	30010586	transposon protein, putative, unclassified, expressed
286			LOC_Os06g49560	30012985	30016023	transposon protein, putative, CACTA, En/Spm sub-class
287			LOC_Os06g49570	30017942	30018559	expressed protein
288			LOC_Os06g49580	30019077	30022364	transposon protein, putative, CACTA, En/Spm sub-class, expressed
289			LOC_Os06g49590	30023179	30023391	hypothetical protein
290			LOC_Os06g49600	30023777	30024530	hypothetical protein
291			LOC_Os06g49610	30026712	30026924	hypothetical protein
292			LOC_Os06g49620	30028720	30029109	expressed protein
293			LOC_Os06g49640	30034712	30037742	uncharacterized UPF0114 domain containing protein, expressed
294			LOC_Os06g49640	30035844	30037729	uncharacterized UPF0114 domain containing protein, expressed
295			LOC_Os06g49640	30035844	30037742	uncharacterized UPF0114 domain containing protein, expressed
296			LOC_Os06g49640	30035844	30037742	uncharacterized UPF0114 domain containing protein, expressed
297			LOC_Os06g49640	30035844	30037742	uncharacterized UPF0114 domain containing protein, expressed
298			LOC_Os06g49640	30035963	30037742	uncharacterized UPF0114 domain containing protein, expressed
299			LOC_Os06g49650	30038569	30039576	harpin-induced protein 1 domain containing protein, expressed
300			LOC_Os06g49660	30051702	30053355	transferase family protein, putative, expressed
301			LOC_Os06g49670	30059823	30062860	pentatricopeptide, putative, expressed
302			LOC_Os06g49670	30059823	30062999	pentatricopeptide, putative, expressed
303			LOC_Os06g49680	30064110	30065313	expressed protein
304			LOC_Os06g49690	30066045	30066843	expressed protein
305			LOC_Os06g49700	30069648	30073756	expressed protein
306			LOC_Os06g49700	30069648	30071912	expressed protein
307			LOC_Os06g49710	30074600	30075499	expressed protein
308			LOC_Os06g49720	30079058	30081576	retrotransposon protein, putative, unclassified, expressed
309			LOC_Os06g49730	30084828	30085115	expressed protein
310			LOC_Os06g49740	30087158	30089572	pre-mRNA-splicing factor syf2, putative, expressed
311			LOC_Os06g49740	30087162	30089572	pre-mRNA-splicing factor syf2, putative, expressed
312			LOC_Os06g49750	30092166	30093513	kelch motif family protein, expressed
313			LOC_Os06g49760	30105871	30106833	invertase/pectin methylesterase inhibitor family protein, putative, expressed
314			LOC_Os06g49770	30113940	30115502	LTPL86 - Protease inhibitor/seed storage/LTP family protein precursor, expressed
315			LOC_Os06g49770	30113940	30115510	LTPL86 - Protease inhibitor/seed storage/LTP family protein precursor, expressed
316			LOC_Os06g49780	30117740	30118771	expressed protein
317			LOC_Os06g49790	30122819	30128027	acyltransferase, putative, expressed
318			LOC_Os06g49800	30128197	30134097	ubiquitin interaction motif family protein, expressed
319			LOC_Os06g49810	30136547	30141160	glycosyl transferase family 8, putative, expressed
320			LOC_Os06g49820	30151743	30155075	transposon protein, putative, CACTA, En/Spm sub-class, expressed
321			LOC_Os06g49830	30161499	30162653	SHI, putative, expressed
322			LOC_Os06g49840	30173485	30178066	OsMADS16 - MADS-box family gene with MIKCc type-box, expressed
323			LOC_Os06g49840	30173485	30177996	OsMADS16 - MADS-box family gene with MIKCc type-box, expressed
324			LOC_Os06g49850	30180081	30180834	expressed protein
325			LOC_Os06g49850	30180116	30180754	expressed protein
326			LOC_Os06g49860	30183274	30186939	methyltransferase, putative, expressed
327			LOC_Os06g49870	30187080	30189238	tRNA-dihydrouridine synthase, putative, expressed
328			LOC_Os06g49880	30196097	30197605	B-box zinc finger family protein, putative, expressed
329			LOC_Os06g49880	30196097	30197605	B-box zinc finger family protein, putative, expressed
330			LOC_Os06g49890	30202970	30207141	coiled-coil domain-containing protein 90A, mitochondrial precursor, putative, expressed
331			LOC_Os06g49900	30209774	30211219	retrotransposon protein, putative, unclassified, expressed
332			LOC_Os06g49910	30212914	30218091	retrotransposon protein, putative, unclassified
333			LOC_Os06g49920	30221418	30223862	expressed protein
334			LOC_Os06g49930	30225218	30230658	OsFBX207 - F-box domain containing protein, expressed
335			LOC_Os06g49930	30225270	30231310	OsFBX207 - F-box domain containing protein, expressed
336			LOC_Os06g49930	30225270	30231310	OsFBX207 - F-box domain containing protein, expressed
337			LOC_Os06g49940	30234847	30236214	retrotransposon protein, putative, unclassified, expressed
338			LOC_Os06g49950	30244635	30251399	retrotransposon protein, putative, unclassified, expressed
339			LOC_Os06g49960	30252028	30255275	retrotransposon protein, putative, unclassified, expressed
340			LOC_Os06g49970	30262778	30266915	alpha-amylase precursor, putative, expressed
341			LOC_Os06g49980	30269919	30272801	expressed protein
342			LOC_Os06g49990	30274469	30279002	UPF0183 protein, putative, expressed
343			LOC_Os06g49990	30274473	30279002	UPF0183 protein, putative, expressed
344			LOC_Os06g49990	30274475	30279002	UPF0183 protein, putative, expressed
345			LOC_Os06g50000	30279363	30281770	LYR motif containing protein, putative, expressed
346			LOC_Os06g50000	30281154	30281770	LYR motif containing protein, putative, expressed
347			LOC_Os06g50010	30282921	30287783	transposon protein, putative, CACTA, En/Spm sub-class, expressed
348			LOC_Os06g50020	30289320	30292651	transposon protein, putative, CACTA, En/Spm sub-class, expressed
349			LOC_Os06g50030	30301723	30308398	CAMK_CAMK_like.30 - CAMK includes calcium/calmodulin depedent protein kinases, expressed
350			LOC_Os06g50040	30314749	30315668	OsSAUR29 - Auxin-responsive SAUR gene family member, expressed
351			LOC_Os06g50050	30332479	30336110	AAA-type ATPase family protein, putative, expressed
352			LOC_Os06g50060	30336259	30336936	ras-related protein, putative, expressed
353			LOC_Os06g50070	30338357	30339335	expressed protein
354			LOC_Os06g50080	30340446	30341829	DUF581 domain containing protein, expressed
355			LOC_Os06g50090	30346014	30346328	expressed protein
356			LOC_Os06g50100	30346755	30350034	tyrosine protein kinase domain containing protein, putative, expressed
357			LOC_Os06g50110	30352994	30357039	expressed protein
358			LOC_Os06g50120	30357699	30361201	novel plant SNARE 11, putative, expressed
359			LOC_Os06g50120	30357699	30361201	novel plant SNARE 11, putative, expressed
360			LOC_Os06g50130	30362750	30363810	expressed protein
361			LOC_Os06g50140	30364054	30366662	endoglucanase, putative, expressed
362			LOC_Os06g50146	30367350	30370711	calcium-dependent protein kinase CPK1 adapter protein 2, putative, expressed
363			LOC_Os06g50154	30371093	30374533	translocon-associated protein subunit alpha precursor, putative, expressed
364			LOC_Os06g50170	30376239	30381348	BRE, putative, expressed
365			LOC_Os06g50180	30383137	30386890	DUF803 domain containing, putative, expressed
366			LOC_Os06g50190	30387917	30394173	retrotransposon protein, putative, unclassified, expressed
367			LOC_Os06g50200	30397267	30400162	retrotransposon protein, putative, unclassified, expressed
368			LOC_Os06g50210	30401326	30403074	expressed protein
369			LOC_Os06g50220	30408646	30414576	expressed protein
370			LOC_Os06g50220	30408646	30414576	expressed protein
371			LOC_Os06g50230	30417657	30418845	expressed protein
372			LOC_Os06g50240	30420078	30422998	thaumatin, putative, expressed
373			LOC_Os06g50250	30422607	30423505	conserved hypothetical protein
374			LOC_Os06g50260	30424966	30427907	retrotransposon protein, putative, Ty3-gypsy subclass, expressed
375			LOC_Os06g50270	30428224	30434334	retrotransposon protein, putative, Ty3-gypsy subclass, expressed
376			LOC_Os06g50280	30434754	30437760	OsFBL31 - F-box domain and LRR containing protein, expressed
377			LOC_Os06g50290	30439404	30443232	transposon protein, putative, Pong sub-class, expressed
378			LOC_Os06g50300	30444411	30450497	heat shock protein, putative, expressed
379			LOC_Os06g50310	30452438	30456222	E2F-related protein, putative, expressed
380			LOC_Os06g50320	30457261	30463308	transposon protein, putative, unclassified, expressed
381			LOC_Os06g50330	30464797	30468102	senescence-associated protein, putative, expressed
382			LOC_Os06g50340	30470045	30474473	receptor protein kinase CLAVATA1 precursor, putative, expressed
383			LOC_Os06g50350	30479410	30480798	expressed protein
384			LOC_Os06g50360	30480316	30485250	pseudouridine synthase family protein, putative, expressed
385			LOC_Os06g50360	30480316	30485250	pseudouridine synthase family protein, putative, expressed
386			LOC_Os06g50370	30492760	30496151	zinc finger, C3HC4 type, domain containing protein, expressed
387			LOC_Os06g50380	30496473	30500935	protein phosphatase 2C, putative, expressed
388			LOC_Os06g50380	30496473	30500934	protein phosphatase 2C, putative, expressed
389			LOC_Os06g50380	30496473	30501195	protein phosphatase 2C, putative, expressed
390			LOC_Os06g50390	30509418	30512323	eukaryotic aspartyl protease domain containing protein, expressed
391			LOC_Os06g50400	30520191	30521381	expansin precursor, putative, expressed
392			LOC_Os06g50410	30521808	30523034	DUF677 domain containing protein, putative, expressed
393			LOC_Os06g50420	30527970	30529070	plastocyanin-like domain containing protein, putative, expressed
394			LOC_Os06g50430	30529299	30530519	expressed protein
395			LOC_Os06g50440	30537132	30538525	expressed protein
396			LOC_Os06g50450	30542967	30550267	expressed protein
397			LOC_Os06g50460	30555601	30557078	expressed protein
398			LOC_Os06g50470	30559812	30560602	expressed protein
399			LOC_Os06g50480	30564131	30567036	bZIP transcription factor domain containing protein, expressed
400			LOC_Os06g50490	30568515	30571159	expressed protein
401			LOC_Os06g50490	30568515	30571159	expressed protein
402			LOC_Os06g50490	30568515	30571159	expressed protein
403			LOC_Os06g50490	30568532	30571159	expressed protein
404			LOC_Os06g50510	30574837	30583595	START domain containing protein, expressed
405			LOC_Os06g50520	30589162	30592998	expressed protein
406			LOC_Os06g50520	30589162	30592998	expressed protein
407			LOC_Os06g50530	30597582	30598058	expressed protein
408			LOC_Os06g50539	30600220	30602807	expressed protein
409			LOC_Os06g50539	30600220	30602807	expressed protein
410			LOC_Os06g50560	30606144	30612936	START domain containing protein, expressed
411			LOC_Os06g50499	30613986	30614432	expressed protein
412			LOC_Os06g50580	30616735	30618162	expressed protein
413			LOC_Os06g50590	30619787	30620220	expressed protein
414			LOC_Os06g50600	30620816	30624219	bZIP transcription factor domain containing protein, expressed
415			LOC_Os06g50600	30620816	30624219	bZIP transcription factor domain containing protein, expressed
416			LOC_Os06g50610	30633803	30634249	transposon protein, putative, unclassified, expressed
417			LOC_Os06g50620	30638237	30639753	expressed protein
418			LOC_Os06g50630	30645085	30652384	expressed protein
419			LOC_Os06g50650	30658367	30659202	plastocyanin-like domain containing protein, putative, expressed
420			LOC_Os06g50659	30664226	30664912	UPF0496 protein 2, putative, expressed
421			LOC_Os06g50670	30666876	30669454	expressed protein
422			LOC_Os06g50679	30670849	30677150	expressed protein
423			LOC_Os06g50706	30682362	30684922	expressed protein
424			LOC_Os06g50715	30686423	30687997	expressed protein
425			LOC_Os06g50724	30688275	30691819	START domain containing protein, expressed
426			LOC_Os06g50733	30695830	30696430	retrotransposon protein, putative, Ty3-gypsy subclass
427			LOC_Os06g50742	30697865	30700403	expressed protein
428			LOC_Os06g50760	30706865	30707323	transposon protein, putative, unclassified
429			LOC_Os06g50770	30718413	30719929	expressed protein
430			LOC_Os06g50780	30725255	30732556	expressed protein
431			LOC_Os06g50789	30736059	30738130	expressed protein
432			LOC_Os06g50800	30740029	30743265	transposon protein, putative, unclassified, expressed
433			LOC_Os06g50809	30748991	30749677	UPF0496 protein 2, putative, expressed
434			LOC_Os06g50818	30751187	30753740	expressed protein
435			LOC_Os06g50830	30754644	30758412	bZIP transcription factor domain containing protein, expressed
436			LOC_Os06g50830	30757599	30758408	bZIP transcription factor domain containing protein, expressed
437			LOC_Os06g50840	30762488	30768201	zinc finger family protein, putative, expressed
438			LOC_Os06g50850	30768267	30770456	expressed protein
439			LOC_Os06g50860	30770702	30773813	hydrolase, acting on carbon-nitrogen, putative, expressed
440			LOC_Os06g50860	30770702	30773820	hydrolase, acting on carbon-nitrogen, putative, expressed
441			LOC_Os06g50870	30774114	30776635	DNL zinc finger domain containing protein, putative, expressed
442			LOC_Os06g50880	30776898	30779652	WD domain, G-beta repeat domain containing protein, expressed
443			LOC_Os06g50890	30779924	30783639	RNA recognition motif containing protein, expressed
444			LOC_Os06g50910	30797112	30815783	Phosphatidylinositol kinase and FAT containing domain protein, putative, expressed
445			LOC_Os06g50900	30799405	30801417	expressed protein
446			LOC_Os06g50910	30802392	30815783	Phosphatidylinositol kinase and FAT containing domain protein, putative, expressed
447			LOC_Os06g50910	30803811	30815783	Phosphatidylinositol kinase and FAT containing domain protein, putative, expressed
448			LOC_Os06g50920	30817438	30823885	protein kinase family protein, putative, expressed
449			LOC_Os06g50930	30823392	30826114	rhodanese-like domain containing protein, putative, expressed
450			LOC_Os06g50930	30823392	30826114	rhodanese-like domain containing protein, putative, expressed
451			LOC_Os06g50940	30828271	30830434	GDSL-like lipase/acylhydrolase, putative, expressed
452			LOC_Os06g50950	30837989	30839952	GDSL-like lipase/acylhydrolase, putative, expressed
453			LOC_Os06g50960	30846360	30848025	expansin precursor, putative, expressed
454			LOC_Os06g50970	30848411	30850264	expressed protein
455			LOC_Os06g50980	30855270	30856121	expressed protein
456			LOC_Os06g50990	30857608	30859463	expressed protein
457			LOC_Os06g51000	30866013	30866879	carrier, putative, expressed
458			LOC_Os06g51010	30868978	30870035	expressed protein
459			LOC_Os06g51029	30870317	30877993	OsFtsH1 FtsH protease, homologue of AtFtsH1/5, expressed
460			LOC_Os06g51029	30875125	30877993	OsFtsH1 FtsH protease, homologue of AtFtsH1/5, expressed
461			LOC_Os06g51050	30887215	30888471	CHIT7 - Chitinase family protein precursor, expressed
462			LOC_Os06g51060	30890711	30892066	CHIT8 - Chitinase family protein precursor, expressed
463			LOC_Os06g51070	30893477	30894523	no apical meristem protein, putative, expressed
464			LOC_Os06g51084	30897376	30905815	1,4-alpha-glucan-branching enzyme, chloroplast precursor, putative, expressed

## Sheet: Table S3_Transporter activity
	List of putative candidate genes associated with Transport activity on Chr02, Chr06 and Chr09
S.No	QTL	chr	locus	start	stop	Gene Description
1	qZnBR.2.1	LG02	LOC_Os02g40090	24270234	24273675	transporter-related, putative, expressed
2			LOC_Os02g40090	24270234	24273561	transporter-related, putative, expressed
3			LOC_Os02g40090	24270234	24273525	transporter-related, putative, expressed
4			LOC_Os02g40090	24270239	24273674	transporter-related, putative, expressed
5			LOC_Os02g40710	24683633	24685205	ammonium transporter protein, putative, expressed
6			LOC_Os02g40730	24690884	24692884	ammonium transporter protein, putative, expressed
7			LOC_Os02g41780	25119033	25122992	transporter-related, putative, expressed
1	qZnBR.9.2	Chr 9	LOC_Os09g06499	3073884	3085958	sulfate transporter 4.1, chloroplast precursor, putative, expressed
2			LOC_Os09g06499	3073884	3092870	sulfate transporter 4.1, chloroplast precursor, putative, expressed
3			LOC_Os09g06970	3369499	3376004	transport protein particle component, Bet3, domain containing protein, expressed
4			LOC_Os09g06970	3369503	3376004	transport protein particle component, Bet3, domain containing protein, expressed
5			LOC_Os09g06970	3369503	3376004	transport protein particle component, Bet3, domain containing protein, expressed
6			LOC_Os09g09320	4988972	4990544	nuclear transport factor, putative, expressed
7			LOC_Os09g09320	4988974	4991687	nuclear transport factor, putative, expressed
8			LOC_Os09g09520	5137884	5142453	transporter family protein, putative, expressed
9			LOC_Os09g09830	5327470	5330178	heavy-metal-associated domain-containing protein, putative, expressed
10			LOC_Os09g09830	5327470	5330178	heavy-metal-associated domain-containing protein, putative, expressed
11			LOC_Os09g09850	5348275	5351915	heavy metal-associated domain containing protein
12			LOC_Os09g09930	5395173	5396935	heavy metal transport/detoxification protein, putative, expressed
13			LOC_Os09g11450	6373268	6383438	transporter, monovalent cation:proton antiporter-2 family, putative, expressed
14			LOC_Os09g11450	6374239	6383644	transporter, monovalent cation:proton antiporter-2 family, putative, expressed
15			LOC_Os09g12590	7218962	7220515	transporter family protein, putative, expressed
16			LOC_Os09g15170	9206558	9211740	nucleobase-ascorbate transporter, putative, expressed
17			LOC_Os09g15330	9366323	9370328	transporter family protein, putative, expressed
18			LOC_Os09g15330	9366323	9370327	transporter family protein, putative, expressed
1	qZnPR.6.2	LG06	LOC_Os06g48060	29072350	29076031	ABC transporter, ATP-binding protein, putative, expressed
2			LOC_Os06g48800	29534805	29536553	OsHKT2;4 - Na+ transporter, expressed
3			LOC_Os06g48810	29538934	29541219	OsHKT2;1 - Na+ transporter, expressed
4			LOC_Os06g49220	29824343	29826786	peptide transporter, putative, expressed
5			LOC_Os06g49230	29828470	29829090	peptide transporter, putative, expressed
6			LOC_Os06g49240	29829475	29831124	PTR-like peptide transporter, putatuve, expressed
7			LOC_Os06g49250	29838283	29841400	peptide transporter PTR2, putative, expressed
8			LOC_Os06g49250	29838283	29841400	peptide transporter PTR2, putative, expressed
9			LOC_Os06g49250	29838283	29841400	peptide transporter PTR2, putative, expressed
10			LOC_Os06g49250	29838298	29841400	peptide transporter PTR2, putative, expressed
11			LOC_Os06g49250	29838298	29841400	peptide transporter PTR2, putative, expressed

## Sheet: Table S4_308 lines Fe & Zn_data
CODE	Fe (ppm)	Zn (ppm)
I 1	8.1	20.4
I 2	7.5	16.4
I 3	8.2	23.9
I 4	10.8	25.7
I 5	9.9	19.6
I 6	8.1	21.3
I 7	7.2	17.6
I 8	9.8	22.2
I 9	9	18.6
I 10	10	27.8
I 11	10	22.7
I 12	9.7	20.8
I 13	8.5	19.9
I 14	8.5	20.9
I 15	10.1	22.3
I 16	8	20.7
I 17	8.3	27.3
I 18	12.5	29.1
I 19	9.2	18.3
I 20	10.7	21.4
I 21	9.8	22.6
I 22	8.7	23.2
I 23	9.9	27
I 24	10	24.2
I 25	10.3	24.8
I 26	10.1	26.1
I 27	9.3	21.8
I 28	8.3	23.5
I 29	9.5	24.9
I 30	11.7	27.1
I 31	10.6	26.3
I 32	9.7	26.1
I 33	8.9	22.6
I 34	8.1	22.5
I 35	10.5	25.6
I 36	11.1	24.1
I 37	11.1	22.8
I 38	10.6	23.1
I 39	9.6	23.4
I 40	10.2	26.8
I 41	10.4	26
I 42	10.6	26.8
I 43	9.6	24.1
I 44	10.3	23.6
I 45	9.3	29.5
I 46	7.9	21.6
I 47	9.5	23
I 48	9.2	21.6
I 49	13.2	25.4
I 50	9.5	21
I 51	9.4	20.2
I 52	10.3	21.8
I 53	11.4	24.6
I 54	8.9	22.2
I 55	8.3	19.7
I 56	8.6	22.8
I 57	8.8	19.4
I 58	11.2	22
I 59	9.1	18.3
I 60	12	24.2
I 61	12.3	37.8
I 62	8.9	21.5
I 63	8.2	20.2
I 64	7.7	18.5
I 65	7.7	18.8
I 66	7.5	19.7
I 67	8.2	20.3
I 68	9.7	20
I 69	9.6	27.7
I 70	10	23.1
I 71	8.4	22.3
I 72	10.7	25.7
I 73	10	20
I 74	9.7	20
I 75	10.8	24
I 76	8.2	25.7
I 77	8.7	19
I 78	8.4	18.5
I 79	9.4	28
I 80	9.7	21.7
I 81	9.1	22.5
I 82	8.5	23.5
I 83	7.5	16.1
I 84	9.7	19.8
I 85	10.2	25.8
I 86	9.9	22.9
I 87	7.9	23.6
I 88	9.5	21.7
I 89	7.6	22.2
I 90	11.2	25.4
I 91	11.2	27.1
I 92	8.3	16.9
I 93	11.9	28.8
I 94	8.4	19.6
I 95	9.4	24.9
I 96	7.2	18.7
I 97	9.3	23
I 98	7.6	17.6
I 99	7	17.5
I 100	8.3	20.9
I 101	9	21.2
I 102	9.9	17.6
I 103	8.1	19.1
I 104	8.6	22.6
I 105	8.1	21.8
I 106	9.4	21
I 107	8.4	20.4
I 108	9.8	19.6
I 109	8.5	17.8
I 110	9.8	23.9
I 111	7.7	19.3
I 112	9.1	21.6
I 113	7.8	20.3
I 114	11.2	32.7
I 115	11.5	36.5
I 116	8.4	19.7
I 117	9.2	21.4
I 118	7.3	19.7
I 119	7.4	17.3
I 120	8.1	20.5
I 121	9.6	20.4
I 122	8	20.1
I 123	7.8	20
I 124	-5.2	-5.1
I 125	8.9	23.5
I 126	8.3	20.1
I 127	7.8	19.3
I 128	9.9	18.4
I 129	9	22.7
I 130	8.6	20.2
I 131	8.9	22.1
I 132	7.1	19.5
I 133	9.7	22.2
I 134	8.6	23.7
I 135	9	23.8
I 136	9.3	23.3
I 137	10.5	24.9
I 138	8.8	21.1
I 139	8.8	25.8
I 140	10.4	23.4
I 141	9.8	26.3
I 142	10.3	19.5
I 143	11	24.5
I 144	8	20.1
I 145	8.9	22.6
I 146	12.3	25.1
I 147	10.5	22.5
I 148	10	22.9
I 149	10.3	22.1
I 150	8.6	24.7
I 151	9.3	23.7
I 152	8.5	21.5
I 153	10.5	23.6
I 154	9.3	23.1
I 155	7.4	17.9
I 156	9.5	24.4
I 157	8.8	22.9
I 158	-5.5	-5.3
I 159	6.6	19.1
I 160	-5	-3.3
I 161	8.7	23.1
I 162	8.7	26.3
I 163	11	22
I 164	8.2	22.6
I 165	9.9	25.3
I 166	8	18.2
I 167	9.9	19.8
I 168	9.7	18.3
I 169	9.4	27
I 170	9.5	20.8
I 171	8.9	20.6
I 172	9.1	22.1
I 173	9.7	22.2
I 174	10	20
I 175	7.4	19.4
I 176	8.4	22.8
I 177	8.9	21
I 178	7.5	18
I 179	7.9	18.7
I 180	11.6	21.6
I 181	9.9	21.4
I 182	9.5	20.1
I 183	9.9	19.4
I 184	8.6	23.3
I 185	7.4	19.4
I 186	9.7	23
I 187	7.9	19.4
I 188	10.6	20.8
I 189	8.2	20.5
I 190	10.3	26.3
I 191	9.5	26.5
I 192	8.6	19.9
I 193	12.8	21.2
I 194	7.9	17.4
I 195	7.9	15.7
I 196	10.9	23.8
I 197	7.7	23
I 198	7.5	17.6
I 199	8.1	17.4
I 200	7.4	19.2
I 201	11.1	21.1
I 202	8.8	19
I 203	8.9	17
I 204	8	20.9
I 205	7.5	20.9
I 206	7.5	20
I 207	10.6	32
I 208	8.8	21.3
I 209	7	21.1
I 210	8.3	22.3
I 211	7.3	19.5
I 212	8.2	20.8
I 213	6.5	17.9
I 214	5.6	20.5
I 215	8.9	26.2
I 216	8.7	23.2
I 217	7.7	20.9
I 218	6.4	18.6
I 219	6.8	15.5
I 220
I 221	9.6	20
I 222	10	20.4
I 223	7.6	18.8
I 224	9.1	17.9
I 225	9.2	20.4
I 226	8.2	22.7
I 227	9.9	22.8
I 228	10	21.8
I 229	8.5	23.5
I 230
I 231	10.8	23.1
I 232	8.1	18.2
I 233	7.6	19.8
I 234	9.2	23.3
I 235	7.3	17.7
I 236	7	16.7
I 237	9	20.8
I 238	8.3	19
I 239	6.4	18.3
I 240	9	23.3
I 241	7.3	20.7
I 242	8.5	18.6
I 243	9.8	20.1
I 244
I 245
I 246	9.4	23.2
I 247	8.4	19.4
I 248
I 249	9.4	19.1
I 250	7.9	22.1
I 251	9.2	18.2
I 252	9.2	19.9
I 253	10.6	20.1
I 254	8.9	19.4
I 255	8.3	20.9
I 256
I 257	10	20.1
I 258	9.8	21.2
I 259	8.2	23.7
I 260	8.7	26.7
I 261	9.4	23.1
I 262	8.1	20.4
I 263	9.4	20.2
I 264	7.6	19.6
I 265	8	19.7
I 266	8.6	20.1
I 267	7.3	21.4
I 268	8.1	17.5
I 269	7.9	19.7
I 270	8.5	22.3
I 271	7.3	19.9
I 272	8.5	16.8
I 273	7.3	18.9
I 274	10.7	20.6
I 275	8.4	20.8
I 276	8.5	21.9
I 277	9.8	22.9
I 278	8.8	22
I 279	7.5	19.7
I 280	8.9	19.1
I 281	7.3	20
I 282	7.2	17.3
I 283	10.1	23.4
I 284	8.2	21.7
I 285	9.2	20.4
I 286	9.1	19.7
I 287	9.4	24.7
I 288	9.2	21.8
I 289	7.3	19.7
I 290	8.5	23.8
I 291	7.7	21.2
I 292	6.7	20.6
I 293	8	18.8
I 294	8.8	19.7
I 295	8.2	16.8
I 296	8.6	17.5
I 297	8.2	20.2
I 298	7.1	18.1
I 299	7	17.6
I 300	11	21.4
I 301	8.3	18.6
I 302	8.4	16.2
I 303	10.5	22.2
I 304	11.6	20.4
I 305	7.8	19
I 306	12	22.6

## Sheet: Table S5_ANOVA
	Mean Square for ZnBR, ZnPR, FeBR, FePR
	Source	df	ZnBR	ZnPR	FeBR	FePR
	Season (S)	3	2695.8393***	2945.2663***	142.2138**	67.4312***
	rep within season	8	44.9465***	151.4598***	9.4924***	1.1855***
	Genotype (G)	93	163.3082***	110.5635***	11.4837***	4.5535***
	G x S	279	32.9698***	29.5423***	4.8369***	4.0481***
	Pooled Error	744	0.0356	0.5732	0.0324	0.0039
		df- Degrees of Freedom		*P < 0.05; **P < 0.05; ***P < 0.001
